# Supplementary material for: A multi-ice-core, annual-layer-counted Greenland ice-core chronology for the last 3800 years: GICC21
Source: Copernicus journal article supplement (doi:10.5194/cp-18-1125-2022), 2022-05-24
Supplement: Supplementary file 1 [file cp-18-1125-2022-supplement.zip]

Archive with 4 entries (4 files):
- GICC21-Straticounter_preprocessing_supplement.xlsx
- Sinnl_et_al_GICC21_Supplementary_Information.pdf
- GICC21-Timescale_supplement.xlsx
- cp-18-1125-2022-supplement-title-page.pdf
