# Supplementary material for: A multi-ice-core, annual-layer-counted Greenland ice-core chronology for the last 3800 years: GICC21
Source: Copernicus journal article supplement (doi:10.5194/cp-18-1125-2022), 2022-05-24
Supplement: Supplementary file 1 [file cp-18-1125-2022-supplement.zip › cp-18-1125-2022-supplement-title-page.pdf]

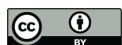

## *Supplement of*

# **A multi-ice-core, annual-layer-counted Greenland ice-core chronology for the last 3800 years: GICC21**

**Giulia Sinnl et al.**

*Correspondence to:* Giulia Sinnl ([giulia.sinnl@nbi.ku.dk](mailto:giulia.sinnl@nbi.ku.dk))

- [cp-18-1125-2022-supplement-title-page.pdf](#)
- [GICC21-Straticounter\\_preprocessing\\_supplement.xlsx](#)
- [GICC21-Timescale\\_supplement.xlsx](#)
- [Sinnl\\_et\\_al\\_GICC21\\_Supplementary\\_Information.pdf](#)

The copyright of individual parts of the supplement might differ from the article licence.
