# Supplementary material for: A multi-ice-core, annual-layer-counted Greenland ice-core chronology for the last 3800 years: GICC21
Source: Copernicus journal article supplement (doi:10.5194/cp-18-1125-2022), 2022-05-24
Supplement: Supplementary file 1 [file cp-18-1125-2022-supplement.zip › GICC21-Straticounter_preprocessing_supplement.xlsx]

## Sheet: Description
Straticounter Supplement for:
Sinnl, et al. "A multi-ice-core, annual-layer counted Greenland ice-core chronology for the last 3850 years: GICC21", 2021,
This information is intended for those who wish to reproduce our results or as an example for how to apply the StratiCounter algorithm by counting on an ice core or sedimentary data.
Released March 1st 2022
Please cite the accompanying paper when citing these data
Sinnl, et al. "A multi-ice-core, annual-layer counted Greenland ice-core chronology for the last 3850 years: GICC21"
When using StratiCounter, please cite: Winstrup, M., Svensson, A. M., Rasmussen, S. O., Winther, O., Steig, E. J., & Axelrod, A. E. (2012). An automated approach for annual layer counting in ice cores. Climate of the Past, 8(6), 1881-1895. https://doi.org/10.5194/cp-8-1881-2012
The algorithm can be found at https://github.com/maiwinstrup/StratiCounter
Please state the full timescale name (Greenlandic Ice Core Chronology 2021) at least once in data files and work based on this time scale.
This file contains 12 sheets:
1) This documentation
2) Manual gap correction
Gaps manually counted in the dataset between 742 and 3835 years b2k.
3) Straticounter modified
The algorithm was modified in this study by implementing a small alteration to the code, in order to be able to run adjacent sections of data without having to restart the algorithm from the top.
The modification is implemented by saving the probability information of the run and feeding the folder (Model.inputdir0) to the next adjacent run.
For more information, please contact the main author of GICC21.
4) Data for Fig.4: convolution means and deviations obtained from Straticounter
This data is intended as a verification to the content of figure 4 in the main paper. The convolutions are obtained by running SC on all ice cores for the intervals described and then convolving the obtained probability distributions.
5-11) Specific StratiCounter preprocessing settings for each ice core.

## Sheet: Manual gap correction
Manual calibration of the missing layers caused by data gaps and by the SC undercount.
Missing layers are manually added based on the layer thickness in the surrounding sections. EastGRIP and NEEM needed the most inserted layers, because small gaps arise as a consequence of the occasional core-quality problems, brittle ice, and trimming of the ice pieces. In other cases, wide data gaps occur due to ice-core breaks. For example, at 300 years after 742, EastGRIP lacked 11 layers, bec…
Manually inserted gap layers
Section		Start	EastGRIP			NorthGRIP1			NorthGRIP2			GRIP			NEEM			NEEM-S1-2011			DYE-3
		(yr b2k)	100	200	300	100	200	300	100	200	300	100	200	300	100	200	300	100	200	300	100	200	300
1	a	742	5	6	11	1	1	1	1	1	1	0	0	0	1	1	1	0	0	0	0	0	0
	b	842	1	6		0	0		0	0		0	0		0	0		0	0		0	0
	c	942	5			0			0			0			0			0			0
2	a	1700	0	0	1	0			0	0	0	0	0	1	2	2	3	0	0	0	0	0	0
	b	1800		0	1				0	0		0	1		0	1		0			0	0
	c	1900		1					0			1			1						0
3	a	2700	4	5	7				9	9	16	0	0	1	1	2	6				0	0	0
	b	2800	1	3					0	7		0	1		1	5					0	0
	c	2900	2									1			4						0
4	a	3500	0	0	0							1	1	1	3	11	18				1	1	1
	b	3600	0	0								0	0		8	15					0	0
	c	3700	0									0			7						0

## Sheet: Straticounter modified
A minor modification to the code of SC was made to allow for separate runs on adjacent parts of the data. This was deemed necessary as the layer pattern, layer thickness, and the data availability are not constant throughout each core. Hence, each core was divided into depth intervals which are counted subsequently. The probability information was transferred from one section to the next, however…
Ice core	Counted intervals [m]	Comment on whole run
EastGRIP	13-27, 27-61, 61-100, 100-250,	Not necessary
	250-300, 300-350, 350-450
NEEM	10 equal sections within [7-194] m, 20 equal sections within [194-750] m	A whole run was performed over [7-194] m;
NEEM-2011-S1	3 equal sections within [ 6-411] m	Not necessary
GRIP	5-100,100-200,200-300,300-700,700-800	Not necessary
NorthGRIP1	26 equal sections within [9-365] m	A whole run was performed on the entire data.
NorthGRIP2	5 equal sections within [159-526] m	A whole run was performed on the entire data.
DYE-3	A separate layer count for 0-100 (no ECM), 15 equal sections within [100-1600] m	A whole run was produced for the interval [450-1600] m

## Sheet: SC-convolution (fig. 4)
Delta (years)	Age years b2k	σ convolution	μ (convolution)	Ncores		Delta (years)	Age years b2k	σ convolution	μ (convolution)	Ncores		Delta (years)	Age years b2k	σ convolution	μ (convolution)	Ncores
100	742	1.76692	98.7926	6		200	742	197.651	2.17055	6		300	742	297.591	2.30962	6
100	842	1.31048	98.4025	6		200	842	198.405	2.09294	6		300	842	299.38	2.25511	6
100	942	1.91244	99.7967	6		200	942	200.165	1.96643	6		300	942	299.29	2.33023	6
100	1042	1.57619	98.9059	6		200	1042	199.118	2.10363	6		300	1042	298.554	2.30164	6
100	1142	1.63396	99.4618	6		200	1142	198.638	2.02613	6		300	1142	298.697	2.19003	6
100	1242	1.50985	99.4595	6		200	1242	198.506	1.96319	6		300	1242	299.192	2.6095	6
100	1342	1.72641	99.3117	6		200	1342	199.566	2.506	6		300	1342	299.016	2.62601	6
100	1442	2.15256	99.6375	6		200	1442	199.885	2.22141	6		300	1442	298.272	2.40762	6
100	1542	1.14517	99.8447	6		200	1542	197.813	1.79753	6		300	1542	296.99	2.02732	5
100	1642	1.68502	98.3624	6		200	1642	197.489	1.9569	5		300	1642	298.574	2.02844	4
100	1700	1.02508	99.3843	6		200	1700	197.985	1.85516	5		300	1700	300.208	1.85319	4
100	1800	1.57521	98.845	5		200	1800	200.14	1.61752	4		300	1800	300.467	1.95089	4
100	1900	1.16422	99.8743	4		200	1900	200.262	1.42423	4		300	1900	300.563	1.91659	4
100	2000	0.906983	99.4063	4		200	2000	200.003	1.59391	4		300	2000	298.552	2.01163	4
100	2100	1.72529	99.8326	4		200	2100	198.693	2.03334	4		300	2100	297.275	2.6233	4
100	2200	1.60441	98.9179	4		200	2200	196.999	2.29714	4		300	2200	296.221	2.68631	4
100	2300	1.22973	99.378	3		200	2300	198.541	1.83171	3		300	2300	299.009	2.44048	3
100	2400	1.35832	99.1368	3		200	2400	199.772	1.98909	3		300	2400	299.008	2.46136	3
100	2500	2.03305	97.7304	4		200	2500	198.154	2.01152	4		300	2500	299.374	2.51822	4
100	2600	1.034	100.459	3		200	2600	201.15	1.57931	4		300	2600	294.884	3.03125	4
100	2700	0.957052	99.274	3		200	2700	199.884	2.00971	4		300	2700	302.93	2.16268	4
100	2800	1.69134	99.1242	4		200	2800	200.405	3.48336	4		300	2800	295.971	3.43998	4
100	2900	2.56065	100.253	4		200	2900	203.881	2.20523	4		300	2900	302.664	2.6165	4
100	3000	1.39322	100.069	4		200	3000	199.39	2.14963	4		300	3000	302.392	2.3314	3
100	3100	1.64222	99.0031	4		200	3100	202.663	1.88531	3		300	3100	304.156	2.16858	3
100	3200	0.999006	100.842	2		200	3200	199.35	1.29248	2		300	3200	298.599	1.76674	2
100	3300	0.791824	97.3801	2		200	3300	197.02	1.50931	2		300	3300	297.032	2.10199	2
100	3400	1.45798	99.1533	2		200	3400	198.13	2.08196	2		300	3400	302.653	2.51053	2
100	3500	1.73838	99.7714	3		200	3500	203.168	2.1965	3		300	3500	303.99	2.41474	3
100	3600	1.89728	100.243	3		200	3600	201.037	2.70772	3
100	3700	1.99875	99.8934	3

## Sheet: EASTGRIP
EastGRIP GICC21 SC settings (Model.)
Run	icecore	dstart	dend	inputdir0	dx	dx_offset	nLayerBatch	manualtemplates		initialpar		nIter	nTemplate	species	preprocsteps{:,1}	preprocsteps{:,2}
1	Eastgrip	13.5	28.2	"	0.0095	0	40	13.5	24.777	13.5	28.2	4	2	Ca (CFA)	log minusmean	zscore,2
														Ca (ICP)	log minusmean	zscore,2
														DEP	log minusmean	zscore,2
														NH4	log minusmean	zscore,2
														NO3	log minusmean	zscore,2
														Na (CFA)	log minusmean	zscore,2
														Na (ICP)	log minusmean	zscore,2
2	Eastgrip	28.2	60.7	Output/Eastgrip/Timescale/13.5-28.2m/#5	0.0085	0	40	28.2	36.812	28.2	60.7	4	2	Ca (CFA)	log minusmean	zscore,2
														Ca (ICP)	log minusmean	zscore,2
														DEP	log minusmean	zscore,2
														NH4	log minusmean	zscore,2
														NO3	log minusmean	zscore,2
														Na (CFA)	log minusmean	zscore,2
														Na (ICP)	log minusmean	zscore,2
3	Eastgrip	60.7	100	Output/Eastgrip/Timescale/28.2-60.7m/#5	0.006	0	40	60.7	66.751	60.7	100	4	2	Ca (CFA)	log minusmean	zscore,2
														Ca (ICP)	log minusmean	zscore,2
														DEP	log minusmean	zscore,2
														NH4	log minusmean	zscore,2
														NO3	log minusmean	zscore,2
														Na (CFA)	log minusmean	zscore,2
														Na (ICP)	log minusmean	zscore,2
4	Eastgrip	100	250	Output/Eastgrip/Timescale/60.7-100m/#4	0.009	0	40	100	106.147	100	250	4	2	Ca (CFA)	log minusmean	zscore,2
														Ca (ICP)	log minusmean	zscore,2
														NH4	log minusmean	zscore,2
														NO3	log minusmean	zscore,2
														Na (CFA)	log minusmean	zscore,2
														Na (ICP)	log minusmean	zscore,2
5	Eastgrip	250	300	Output/Eastgrip/Timescale/100-250m/#2	0.0093	0	50	250	264.88	250	300	4	2	Ca (CFA)	log minusmean	zscore,2
														Ca (ICP)	log minusmean	zscore,2
														NH4	log minusmean	zscore,2
														NO3	log minusmean	zscore,2
														Na (CFA)	log minusmean	zscore,2
														Na (ICP)	log minusmean	zscore,2
6	Eastgrip	300	350	Output/Eastgrip/Timescale/250-300m/#1	0.0092	0	50	330.044	350	300	350	4	2	Ca (CFA)	log minusmean interpnans	zscore,2
														Ca (ICP)	log minusmean interpnans	zscore,2
														NH4	log minusmean interpnans	zscore,2
														NO3	log minusmean interpnans	zscore,2
														Na (CFA)	log minusmean interpnans	zscore,2
														Na (ICP)	log minusmean interpnans	zscore,2
7	Eastgrip	350	450	Output/Eastgrip/Timescale/300-350m/#1	0.006	0	40	350	383.967	350	450	4	2	Ca_350_905	log minusmean interpnans	zscore,2
														NH4+	log minusmean interpnans	zscore,2
														NO3-	log minusmean interpnans	zscore,2
														Na_350_905	log minusmean interpnans	zscore,2

## Sheet: NEEM
NEEM GICC21 SC settings (Model.)
Run	icecore	dstart	dend	inputdir0	dx	dx_offset	nLayerBatch	manualtemplates		initialpar		nIter	nTemplate	species	preprocsteps{:,1}	preprocsteps{:,2}
1	Neem	7.2	194	"	0.015	0	40	7.2	194	7.2	194	4	2	Ca	interpnans minusmean log	zscore, 2
														ECM	interpnans	zscore, 2
														NH4	interpnans minusmean log	zscore, 2
														NO3	interpnans minusmean log	zscore, 2
														Na	interpnans minusmean log	zscore, 2
2	Neem	194	242	Output/Neem/Timescale/7.2-194m/#1	0.015	0	40	197.651	199.805	194	242	4	2	Ca	interpnans minusmean log	zscore, 2
														ECM	interpnans	zscore, 2
														NH4	interpnans minusmean log	zscore, 2
														NO3	interpnans minusmean log	zscore, 2
														Na	interpnans minusmean log	zscore, 2
3	Neem	242	267.385	Output/Neem/Timescale/194-242m/#1	0.015	0	40	242	246.956	242	267.385	4	2	Ca	interpnans minusmean log	zscore, 2
														ECM	interpnans	zscore, 2
														NH4	interpnans minusmean log	zscore, 2
														NO3	interpnans minusmean log	zscore, 2
														Na	interpnans minusmean log	zscore, 2
4	Neem	267.385	292.769	Output/Neem/Timescale/242-267.3846m/#1	0.015	0	40	267.385	272.08	267.385	292.769	4	2	Ca	interpnans minusmean log	zscore, 2
														ECM	interpnans	zscore, 2
														NH4	interpnans minusmean log	zscore, 2
														NO3	interpnans minusmean log	zscore, 2
														Na	interpnans minusmean log	zscore, 2
5	Neem	292.769	318.154	Output/Neem/Timescale/267.3846-292.7692m/#1	0.015	0	40	292.769	297.546	292.769	318.154	4	2	Ca	interpnans minusmean log	zscore, 2
														ECM	interpnans	zscore, 2
														NH4	interpnans minusmean log	zscore, 2
														NO3	interpnans minusmean log	zscore, 2
														Na	interpnans minusmean log	zscore, 2
6	Neem	318.154	343.538	Output/Neem/Timescale/292.7692-318.1538m/#1	0.015	0	40	318.154	322.95	318.154	343.538	4	2	Ca	interpnans minusmean log	zscore, 2
														ECM	interpnans	zscore, 2
														NH4	interpnans minusmean log	zscore, 2
														NO3	interpnans minusmean log	zscore, 2
														Na	interpnans minusmean log	zscore, 2
7	Neem	343.538	368.923	Output/Neem/Timescale/318.1538-343.5385m/#1	0.015	0	40	343.538	348.446	343.538	368.923	4	2	Ca	interpnans minusmean log	zscore, 2
														ECM	interpnans	zscore, 2
														NH4	interpnans minusmean log	zscore, 2
														NO3	interpnans minusmean log	zscore, 2
														Na	interpnans minusmean log	zscore, 2
8	Neem	368.923	394.308	Output/Neem/Timescale/343.5385-368.9231m/#1	0.015	0	40	368.923	373.619	368.923	394.308	4	2	Ca	interpnans minusmean log	zscore, 2
														ECM	interpnans	zscore, 2
														NH4	interpnans minusmean log	zscore, 2
														NO3	interpnans minusmean log	zscore, 2
														Na	interpnans minusmean log	zscore, 2
9	Neem	394.308	419.692	Output/Neem/Timescale/368.9231-394.3077m/#1	0.015	0	40	394.308	399.026	394.308	419.692	4	2	Ca	interpnans minusmean log	zscore, 2
														ECM	interpnans	zscore, 2
														NH4	interpnans minusmean log	zscore, 2
														NO3	interpnans minusmean log	zscore, 2
														Na	interpnans minusmean log	zscore, 2
10	Neem	419.692	445.077	Output/Neem/Timescale/394.3077-419.6923m/#1	0.015	0	40	419.692	424.492	419.692	445.077	4	2	Ca	interpnans minusmean log	zscore, 2
														ECM	interpnans	zscore, 2
														NH4	interpnans minusmean log	zscore, 2
														NO3	interpnans minusmean log	zscore, 2
														Na	interpnans minusmean log	zscore, 2
11	Neem	445.077	470.462	Output/Neem/Timescale/419.6923-445.0769m/#1	0.015	0	40	445.077	449.837	445.077	470.462	4	2	Ca	interpnans minusmean log	zscore, 2
														ECM	interpnans	zscore, 2
														NH4	interpnans minusmean log	zscore, 2
														NO3	interpnans minusmean log	zscore, 2
														Na	interpnans minusmean log	zscore, 2
12	Neem	470.462	495.846	Output/Neem/Timescale/445.0769-470.4615m/#1	0.015	0	40	470.462	475.206	470.462	495.846	4	2	Ca	interpnans minusmean log	zscore, 2
														ECM	interpnans	zscore, 2
														NH4	interpnans minusmean log	zscore, 2
														NO3	interpnans minusmean log	zscore, 2
														Na	interpnans minusmean log	zscore, 2
13	Neem	495.846	521.231	Output/Neem/Timescale/470.4615-495.8462m/#1	0.015	0	40	495.846	500.718	495.846	521.231	4	2	Ca	interpnans minusmean log	zscore, 2
														ECM	interpnans	zscore, 2
														NH4	interpnans minusmean log	zscore, 2
														NO3	interpnans minusmean log	zscore, 2
														Na	interpnans minusmean log	zscore, 2
14	Neem	521.231	546.615	Output/Neem/Timescale/495.8462-521.2308m/#1	0.015	0	40	521.231	526.031	521.231	546.615	4	2	Ca	interpnans minusmean log	zscore, 2
														ECM	interpnans	zscore, 2
														NH4	interpnans minusmean log	zscore, 2
														NO3	interpnans minusmean log	zscore, 2
														Na	interpnans minusmean log	zscore, 2
15	Neem	546.615	572	Output/Neem/Timescale/521.2308-546.6154m/#1	0.015	0	40	546.615	551.354	546.615	572	4	2	Ca	interpnans minusmean log	zscore, 2
														ECM	interpnans	zscore, 2
														NH4	interpnans minusmean log	zscore, 2
														NO3	interpnans minusmean log	zscore, 2
														Na	interpnans minusmean log	zscore, 2
16	Neem	572	597.333	Output/Neem/Timescale/546.6154-572m/#1	0.015	0	40	572	578.912	572	597.333	4	2	Ca	interpnans minusmean log	zscore, 2
														ECM	interpnans	zscore, 2
														NH4	interpnans minusmean log	zscore, 2
														NO3	interpnans minusmean log	zscore, 2
														Na	interpnans minusmean log	zscore, 2
17	Neem	597.333	622.667	Output/Neem/Timescale/572-597.3333m/#1	0.015	0	40	597.333	603.338	597.333	622.667	4	2	Ca	interpnans minusmean log	zscore, 2
														ECM	interpnans	zscore, 2
														NH4	interpnans minusmean log	zscore, 2
														NO3	interpnans minusmean log	zscore, 2
														Na	interpnans minusmean log	zscore, 2
18	Neem	622.667	648	Output/Neem/Timescale/597.3333-622.6667m/#1	0.015	0	40	622.667	629.636	622.667	648	4	2	Ca	interpnans minusmean log	zscore, 2
														ECM	interpnans	zscore, 2
														NH4	interpnans minusmean log	zscore, 2
														NO3	interpnans minusmean log	zscore, 2
														Na	interpnans minusmean log	zscore, 2
19	Neem	648	673.333	Output/Neem/Timescale/622.6667-648m/#1	0.015	0	40	648	654.77	648	673.333	4	2	Ca	interpnans minusmean log	zscore, 2
														ECM	interpnans	zscore, 2
														NH4	interpnans minusmean log	zscore, 2
														NO3	interpnans minusmean log	zscore, 2
														Na	interpnans minusmean log	zscore, 2
20	Neem	673.333	698.667	Output/Neem/Timescale/648-673.3333m/#1	0.015	0	40	673.333	679.565	673.333	698.667	4	2	Ca	interpnans minusmean log	zscore, 2
														ECM	interpnans	zscore, 2
														NH4	interpnans minusmean log	zscore, 2
														NO3	interpnans minusmean log	zscore, 2
														Na	interpnans minusmean log	zscore, 2
21	Neem	698.667	724	Output/Neem/Timescale/673.3333-698.6667m/#1	0.015	0	40	711.933	715.411	698.667	724	4	2	Ca	interpnans minusmean log	zscore, 2
														ECM	interpnans	zscore, 2
														NH4	interpnans minusmean log	zscore, 2
														NO3	interpnans minusmean log	zscore, 2
														Na	interpnans minusmean log	zscore, 2
22	Neem	724	749.333	Output/Neem/Timescale/698.6667-724m/#1	0.015	0	40	724	728.848	724	749.333	4	2	Ca	interpnans minusmean log	zscore, 2
														ECM	interpnans	zscore, 2
														NH4	interpnans minusmean log	zscore, 2
														NO3	interpnans minusmean log	zscore, 2
														Na	interpnans minusmean log	zscore, 2

## Sheet: NorthGRIP1
NorthGRIP1 GICC21 SC settings (Model.)
Run	icecore	dstart	dend	inputdir0	dx	dx_offset	nLayerBatch	manualtemplates		initialpar		nIter	nTemplate	species	preprocsteps{:,1}	preprocsteps{:,2}
1	Northgrip1	9.8	365	""	0.01	0	50	9.8	365	9.8	365	4	1	Ca_ic	interpnans minusmean log	zscore, 2
														Cl_ic	interpnans minusmean	zscore, 2
														ECM	interpnans minusmean	zscore, 2
														Mg_ic	interpnans minusmean	zscore, 2
														NH4_ic	interpnans minusmean log	zscore, 2
														NO3_ic	interpnans minusmean log	zscore, 2
														Na_ic	interpnans minusmean log	zscore, 2
														SO4_ic	interpnans minusmean	zscore, 2
														d18O	interpnans minusmean	zscore, 2

## Sheet: NorthGRIP2
NorthGRIP2 GICC21 SC settings (Model.)
Run	icecore	dstart	dend	inputdir0	dx	dx_offset	nLayerBatch	manualtemplates		initialpar		nIter	nTemplate	species	preprocsteps{:,1}	preprocsteps{:,2}
1	Northgrip2	159	209	"	0.0155	0	50	165.033	178.381	159	209	4	2	Ca_DRI	log minusmean	zscore, 2
														HNO3_DRI	log minusmean	zscore, 2
														NH4_DRI	log minusmean	zscore, 2
														Na_DRI	log minusmean	zscore, 2
2	Northgrip2	209	350	Output/Northgrip2/Timescale/159-209m/#1	0.015	0	50	209	350	209	350	4	2	Ca_DRI	log minusmean	zscore, 2
														HNO3_DRI	log minusmean	zscore, 2
														NH4_DRI	log minusmean	zscore, 2
														Na_DRI	log minusmean	zscore, 2
3	Northgrip2	350	526	Output/Northgrip2/Timescale/209-350m/#1	0.014	0	50	350	526	350	526	4	2	Ca_DRI	log minusmean	zscore, 2
														HNO3_DRI	log minusmean	zscore, 2
														NH4_DRI	log minusmean	zscore, 2
														Na_DRI	log minusmean	zscore, 2

## Sheet: NEEM-2011-S1
NEEM-2011-S1 GICC21 SC settings (Model.)
Run	icecore	dstart	dend	inputdir0	dx	dx_offset	nLayerBatch	manualtemplates		initialpar		nIter	nTemplate	species	preprocsteps{:,1}	preprocsteps{:,2}
1	NEEM-2011-S1	6	156	"	0.03	0	40	6	39.511	6	156	4	2	BC_b	log minusmean interpnans	zscore, 1
														NH4_b	log minusmean interpnans	zscore, 1
														Na_b	log minusmean interpnans	zscore, 1
														nssCa_b	log minusmean interpnans	zscore, 1
														nssSNa_b	log minusmean interpnans	zscore, 1
2	NEEM-2011-S1	156	182.5	Output/NEEM-2011-S1/Timescale/6-156m/#1	0.0165	0	40	156	167.98	156	182.5	4	2	BC_b	log minusmean interpnans	zscore, 1
														NH4_b	log minusmean interpnans	zscore, 1
														Na_b	log minusmean interpnans	zscore, 1
														nssCa_b	log minusmean interpnans	zscore, 1
														nssSNa_b	log minusmean interpnans	zscore, 1
3	NEEM-2011-S1	182.5	411	Output/NEEM-2011-S1/Timescale/156-182.5m/#1	0.0165	0	40	190.171	210.962	182.5	411	4	2	BC_b	log minusmean interpnans	zscore, 1
														NH4_b	log minusmean interpnans	zscore, 1
														Na_b	log minusmean interpnans	zscore, 1
														nssCa_b	log minusmean interpnans	zscore, 1
														nssSNa_b	log minusmean interpnans	zscore, 1

## Sheet: GRIP
GRIP GICC21 SC settings (Model.)
Run	icecore	dstart	dend	inputdir0	dx	dx_offset	nLayerBatch	manualtemplates		initialpar		nIter	nTemplate	species	preprocsteps{:,1}	preprocsteps{:,2}
1	GRIP	5	100	"	0.03	0	50	5	28.78	5	100	4	2	ECM	minusmean	zscore, 25
														d18O	minusmean	zscore, 25
														d18O_deconv	minusmean	zscore, 25
2	GRIP	100	200	Output/GRIP/Timescale/5-100m/#2	0.03	0	50	105.356	118.841	100	200	4	2	ECM	minusmean	zscore, 25
														d18O	minusmean	zscore, 25
														d18O_deconv	minusmean	zscore, 25
3	GRIP	200	300	Output/GRIP/Timescale/100-200m/#2	0.03	0	50	205.315	220.854	200	300	4	2	ECM	minusmean	zscore, 25
														d18O	minusmean	zscore, 25
														d18O_deconv	minusmean	zscore, 25
4	GRIP	300	700	Output/GRIP/Timescale/200-300m/#2	0.0165	0	50	300	314.193	300	700	4	2	ECM	minusmean	zscore, 25
														d18O	minusmean	zscore, 25
														d18O_deconv	minusmean	zscore, 25
5	GRIP	700	800	Output/GRIP/Timescale/300-700m/#1	0.01245	0	50	700	705.853	700	800	4	2	ECM	minusmean	zscore, 25
														d18O	minusmean	zscore, 25
														d18O_deconv	minusmean	zscore, 25

[truncated: 1 more sheets: DYE-3]
