# Supplementary material for: A multi-ice-core, annual-layer-counted Greenland ice-core chronology for the last 3800 years: GICC21
Source: Copernicus journal article supplement (doi:10.5194/cp-18-1125-2022), 2022-05-24
Supplement: Supplementary file 1 [file cp-18-1125-2022-supplement.zip › GICC21-Timescale_supplement.xlsx]

## Sheet: 1) Description + age conversion
The GICC21 Timescale back to 3835 years b2k
Released XXX YYth 2022
Please cite the accompanying paper when citing these data:
Sinnl, et al. "A multi-ice-core, annual-layer counted Greenland ice-core chronology for the last 3850 years: GICC21"
Please state the full timescale name (Greenlandic Ice Core Chronology 2021) at least once in data files and work based on this time scale.
This file contains 5 sheets:
1) This documentation and an age conversion aid between CE/BCE and years b2k
Conversion used in this study between b2k and CE/BCE (for years BP see McConnell et al., 2020)
Although, for convenience, years b2k have decimal point ages, for the year CE/BCE we prefer keeping a rounded year and a date in months. To recover an approximate b2k age from a CE/BCE date, or viceversa, a date fraction D is defined as D=(365-d)/365; d being the day of the year. If D is unknown or irrelevant, set D=1.		Example CONVERTED ages around year +/-1:
		Age CE/BCE (+/1)	Approx. Date	d (day)	D=(365-d)/365	Age b2k
from b2k to CE	from CE to b2k	2	2022-12-31	364	0.00273973	1997
t_CE=2000-ceiling(t_b2k)	t_b2k=2000-t_CE-1+D	2	2022-12-28	362	0.01	1997.01
		2	2022-11-01	305	0.164384	1997.16
from b2k to BCE	from BCE to b2k	2	2022-06-01	152	0.583562	1997.58
t_BCE=2000-ceiling(t_b2k)-1	t_b2k=2000-t_BCE-2+D	2	2022-02-01	32	0.912329	1997.91
		2	2022-01-02	1	0.99726	1998
		2	2022-01-01	0	1	1998
		1	2022-12-31	364	0.00273973	1998
		1	2022-12-28	362	0.01	1998.01
		1	2022-11-01	305	0.164384	1998.16
		1	2022-06-01	152	0.583562	1998.58
		1	2022-02-01	32	0.912329	1998.91
		1	2022-01-02	1	0.99726	1999
		1	2022-01-01	0	1	1999
		-1	2022-12-31	364	0.00273973	1999
		-1	2022-12-28	362	0.01	1999.01
		-1	2022-11-01	305	0.164384	1999.16
		-1	2022-06-01	152	0.583562	1999.58
		-1	2022-02-01	32	0.912329	1999.91
		-1	2022-01-02	1	0.99726	2000
		-1	2022-01-01	0	1	2000
		-2	2022-12-31	364	0.00273973	2000
		-2	2022-12-28	362	0.01	2000.01
		-2	2022-11-01	305	0.164384	2000.16
		-2	2022-06-01	152	0.583562	2000.58
		-2	2022-02-01	32	0.912329	2000.91
		-2	2022-01-02	1	0.99726	2001
		-2	2022-01-01	0	1	2001
		-3	2022-12-31	364	0.00273973	2001
2) Depth vs. Age GICC21: Layer boundaries for all ice cores involved in this study, reported on each ice core's depth and on the common agescale GICC21.
The layer boundary is defined at January 1st of year b2k and at December 31st of year CE/BCE
Uncertainty on the timescale age is reported as the value of δt according to the formula provided in the paper, to be interpreted as 1 σ.
GICC21 terminates at 3835 years b2k, after which we refer to GICC05 until the reviewing process completes GICC21 in the Holocene. As a result, a rigid offset towards younger ages must be included when working on GICC05 ages older than 3835 years b2k. The amount of calibration needed is 14 years for DYE-3, 12 years for EastGRIP, 11 years for GRIP, and 12 years for any other ice core based on the a…
3) Matchpoints between all ice cores involved in this study.
Matchpoints are classified according to: Volcanic match or Ammonium match. The tie-points were used for aligning the ice cores independently from the layer count.
The matchpoints are reported on each ice core's depth and age. The ages are averaged with a standard deviation, which indicates the spread of the peak with respect to adjacent layer boundaries, i.e. the seasonality of the event.
Matchpoints with no assigned age are matched outside the annually resolved data (see sheet 4).
4) Transferred GICC21 ages for the remaining NorthGRIP1 and NorthGRIP2 data sections without annual layers
For the age ranges [1800-3835] years b2k (NorthGRIP1) and [39-730; 3244-3835] years b2k (NorthGRIP2) there is no annually resolved impurity data for annual layer counting, however both ice cores have acidity records for inter-core matching.
GICC21 was tranferred making use of the acidity records, which were matched to the other ice cores using major tie points.
Ages for matched horizons were set equal to the averages found in the "Matchpoints" sheet in the "Age average" column.
Ages between the horizons were interpolated linearly.
5) Transfer function GICC21-GICC05
The transfer function was calculated by, first, acquiring the timescale offsets of each of the ice cores involved in this study. Then, we computed the uncertainty using equation (1). For each year between 0 and 3835 years b2k, a weighted mean of the offset and the corresponding weighted uncertainty is calculated. The transfer function is reported in the Timescale Supplement. For the ice cores Eas…

## Sheet: 2) Depth vs. Age GICC21
GICC21 Layer boundaries (Dec 31st of year b2k; 1 Jan of year CE/BCE)			EastGRIP	NEEM	NorthGRIP1	NorthGRIP2	NEEM-2011-S1	GRIP	DYE-3 79	DYE-3 4B	DYE-3 18C
Age, years b2k	δt, years	Age, years CE/BCE	Depth, m	Depth, m	Depth, m	Depth, m	Depth, m	Depth, m	Depth, m	Depth, m	Depth, m
1	2	1999					6.3
2	2	1998					6.735
3	2	1997					7.185
4	2	1996					7.665
5	2	1995		7.6			8.085
6	2	1994		7.9225			8.685
7	2	1993		8.4175			9.465
8	2	1992		8.8075			9.885
9	2	1991		9.1075			10.215
10	2	1990		9.4375			10.515
11	2	1989		9.8575			10.845
12	2	1988		10.3675			11.325
13	2	1987		10.7125			11.745
14	2	1986		11.1025			12.105
15	2	1985		11.4925			12.585
16	2	1984		11.8375			12.885
17	2	1983		12.1675			13.095
18	2	1982		12.4375			13.395			1.845
19	2	1981		12.7975			13.725			2.733
20	2	1980		13.1275			14.084	5.325		3.879
21	2	1979		13.4575			14.343	5.825	0.934	4.984
22	2	1978		13.8175			14.805	6.15	1.994	6.053
23	2	1977		14.1775			15.225	6.75	3.455	7.213	7.339
24	2	1976		14.5825			15.615	7.05	4.85	8.333	8.089
25	2	1975		14.9875			16.035	7.725	6.053	9.416	9.06
26	2	1974		15.3775			16.425	8.075	7.087	10.233	9.772
27	2	1973		15.8275	9.9		16.815	8.55	8.578	11.596	10.807
28	2	1972		16.1275	10.257		17.145	8.95	9.653	12.928	11.596
29	2	1971		16.4725	10.647		17.535	9.425	10.579	13.698	12.486
30	2	1970		16.884	10.919		17.865	9.85	11.818	14.572	13.259
31	2	1969		17.2525	11.226		18.195	10.2	12.597	15.224	13.808
32	2	1968	13.82	17.6875	11.675		18.615	10.6	13.149	15.872	14.355
33	2	1967	14	17.9875	11.982		18.945	10.975	14.137	16.837	15.116
34	2	1966	14.15	18.3775	12.254		19.305	11.225	14.681	17.369	15.872
35	2	1965	14.304	18.6925	12.573		19.605	11.7	15.44	18.11	16.194
36	2	1964	14.464	19.0525	12.974		19.935	12.1	16.73	19.267	17.156
37	2	1963	14.608	19.4875	13.311		20.325	12.475	17.582	19.892	17.688
38	2	1962	14.864	19.7575	13.609		20.715	12.85	18.11	20.515	18.216
39	2	1961	15.024	20.0425	13.87		20.955	13.25	19.057	21.134	18.847
40	2	1960	15.184	20.2825	14.152		21.225	13.625	20.205	21.955	19.788
41	2	1959	15.472	20.5675	14.488		21.465	14.025	21.134	23.277	20.515
42	2	1958	15.616	20.8375	14.814		21.765	14.625	22.261	24.184	21.237
43	2	1957	15.84	21.1975	15.129		22.065	14.85	23.176	24.984	21.751
44	2	1956	16.048	21.5575	15.425		22.425	15.375	23.781	25.78	22.363
45	2	1955	16.24	21.8575	15.807		22.815	15.775	24.784	26.668	23.176
46	2	1954	16.48	22.3525	16.198		23.175	16.15	25.78	27.648	23.882
47	2	1953	16.736	22.6825	16.425		23.535	16.5	26.274	28.038	24.385
48	2	1952	16.928	23.0575	16.801		23.865	16.975	27.061	29.007	25.084
49	2	1951	17.104	23.2975	17.065		24.165	17.225	27.745	29.585	25.78
50	2	1950	17.328	23.5975	17.365		24.495	17.6	28.62	30.447	26.372
51	2	1949	17.536	23.9425	17.649		24.825	17.825	29.2	31.209	26.963
52	2	1948	17.664	24.3325	17.975		25.155	18.225	29.873	31.871	27.453
53	2	1947	17.888	24.5425	18.285		25.365	18.625	31.113	32.718	28.135
54	2	1946	18.064	24.8725	18.625		25.695	19.075	32.06	33.653	28.91
55	2	1945	18.272	25.2325	18.984		26.055	19.575	33.186	34.765	29.969
56	2	1944	18.384	25.4575	19.293		26.295	20	34.024	35.318	30.447
57	2	1943	18.48	25.6975	19.548		26.535	20.275	34.858	36.052	31.018
58	2	1942	18.608	26.0125	19.735		26.835	20.625	35.41	36.873	31.776
59	2	1941	18.784	26.3425	20.118		27.105	21.05	36.509	37.869	32.436
60	2	1940	19.024	26.6875	20.427		27.465	21.275	37.236	38.68	33.092
61	2	1939	19.2	27.0775	20.758		27.885	21.725	38.59	39.752	34.024
62	2	1938	19.424	27.3775	20.975		28.155	22.15	39.127	40.196	34.488
63	2	1937	19.568	27.6475	21.235		28.395	22.425	40.108	41.081	35.226
64	2	1936	19.696	27.9625	21.573		28.695	22.825	40.728	41.873	35.869
65	2	1935	19.856	28.2025	21.801		28.995	23.25	41.345	42.311	36.418
66	2	1934	20.064	28.5325	22.075		29.325	23.5	42.048	42.922	36.964
67	2	1933	20.288	28.9375	22.398		29.715	24	43.182	44.049	37.689
68	2	1932	20.432	29.3425	22.815		30.075	24.5	44.049	44.825	38.41
69	2	1931	20.592	29.7625	23.135		30.405	24.75	44.567	45.425	38.859
70	2	1930	20.752	30.0325	23.375		30.765	25.025	45.254	46.024	39.396
71	2	1929	20.96	30.4	23.678		31.065	25.425	46.194	46.959	40.196
72	2	1928	21.12	30.7825	24.085		31.545	25.725	46.874	47.72	40.728
73	2	1927	21.264	31.15	24.351		31.815	26.075	47.72	48.309	41.169
74	2	1926	21.368	31.3525	24.601		32.085	26.425	48.393	48.98	41.873
75	2	1925	21.536	31.6825	24.815		32.355	26.725	49.064	49.565	42.398
76	2	1924	21.728	31.9525	25.055		32.655	26.975	49.481	50.147	42.922
77	2	1923	21.904	32.3	25.285		32.955	27.275	50.313	50.81	43.443
78	2	1922	22.048	32.5	25.575		33.255	27.575	51.058	51.553	44.049
79	2	1921	22.192	32.7025	25.765		33.495	27.9	51.8	52.292	44.653
80	2	1920	22.368	33.0325	26.065		33.705	28.225	52.374	52.783	45.168
81	2	1919	22.496	33.4	26.295		34.065	28.525	53.029	53.517	45.682
82	2	1918	22.648	33.625	26.575		34.335	28.825	53.761	54.329	46.279
83	2	1917	22.8	33.9775	26.815		34.635	29.175	54.653	55.056	47.044
84	2	1916	22.976	34.3075	27.145		34.935	29.6	55.137	55.54	47.467
85	2	1915	23.2	34.7275	27.475		35.355	29.9	55.861	56.342	47.973
86	2	1914	23.392	34.9825	27.755		35.655	30.275	56.502	56.822	48.561
87	2	1913	23.616	35.2225	28.055		35.925	30.55	57.3	57.618	49.064
88	2	1912	23.8	35.5375	28.275		36.225	30.825	58.094	58.094	49.648
89	2	1911	23.92	35.7475	28.525		36.435	31.275	58.728	58.964	50.23
90	2	1910	24.032	35.9425	28.765		36.645	31.575	59.201	59.594	50.727
91	2	1909	24.192	36.2425	29.025		36.885	31.9	59.83	60.066	51.223
92	2	1908	24.336	36.5725	29.327		37.155	32.15	60.614	60.926	51.882
93	2	1907	24.528	36.8125	29.522		37.395	32.45	61.082	61.394	52.456
94	2	1906	24.72	37.0375	29.826		37.665	32.775	61.628	61.861	52.701
95	2	1905	24.928	37.2925	30.072		37.935	33.05	62.249	62.482	53.273
96	2	1904	25.04	37.5475	30.364		38.235	33.325	62.791	63.023	53.761
97	2	1903	25.168	37.8175	30.543		38.475	33.55	63.332	63.563	54.167
98	2	1902	25.328	38.1325	30.944		38.745	33.975	64.178	64.255	54.733
99	2	1901	25.472	38.4025	31.255		39.05	34.375	64.868	64.945	55.379
100	2	1900	25.6	38.85	31.574		39.3	34.675	65.556	65.709	55.941
101	2	1899	25.84	39.1225	31.775		39.765	34.975	66.089	66.242	56.422
102	2	1898	26.016	39.3925	31.995		40.005	35.275	67	67.076	57.141
103	2	1897	26.224	39.6025	32.235		40.215	35.575	67.606	67.606	57.698
104	2	1896	26.368	39.8875	32.525		40.545	35.975	68.36	68.435	58.332
105	2	1895	26.56	40.2325	32.825		40.875	36.275	68.961	69.036	58.885
106	2	1894	26.704	40.5175	33.121		41.175	36.625	69.561	69.486	59.28
107	2	1893	26.928	40.7875	33.365		41.475	36.9	70.159	70.234	59.752
108	2	1892	27.12	41.1475	33.685		41.805	37.175	70.682	70.607	60.222
109	2	1891	27.28	41.4925	33.965		42.135	37.575	71.128	71.128	60.692
110	2	1890	27.456	41.7775	34.195		42.405	37.825	71.797	71.723	61.16
111	2	1889	27.648	42.0775	34.445		42.705	38.125	72.611	72.463	61.706
112	2	1888	27.776	42.3625	34.745		43.035	38.6	73.128	73.201	62.327
113	2	1887	27.92	42.6925	35.085		43.305	38.85	73.643	73.57	62.714
114	2	1886	28.128	42.9775	35.387		43.605	39.125	74.158	74.085	63.1
115	2	1885	28.308	43.2625	35.575		43.875	39.425	74.525	74.525	63.563
116	2	1884	28.455	43.4275	35.825		44.055	39.75	75.257	75.038	64.025
117	2	1883	28.595	43.7275	36.035		44.325	40.05	75.768	75.768	64.485
118	2	1882	28.721	44.0425	36.299		44.595	40.35	76.279	76.133	64.945
119	2	1881	28.861	44.3275	36.526		44.895	40.625	76.933	76.788	65.48
120	2	1880	29.071	44.6275	36.775		45.285	40.925	77.514	77.441	65.937
121	2	1879	29.267	44.9425	37.123		45.5	41.175	77.948	77.731	66.318
122	2	1878	29.435	45.4	37.465		46.005	41.575	78.598	78.382	66.925
123	2	1877	29.631	45.6925	37.742		46.305	41.825	78.959	78.743	67.228
124	2	1876	29.841	46.1125	38.03		46.635	42.175	79.535	79.391	67.757
125	2	1875	29.995	46.3675	38.252		46.935	42.475	80.469	79.966	68.36
126	2	1874	30.149	46.6525	38.573		47.235	42.725	80.97	80.684	68.736
127	2	1873	30.303	46.8625	38.817		47.5	42.975	81.613	81.328	69.187
128	2	1872	30.457	47.1475	39.085		47.685	43.4	82.255	81.97	69.786
129	2	1871	30.639	47.4625	39.345		48.105	43.675	82.967	82.825	70.533
130	2	1870	30.863	47.7325	39.653		48.405	43.95	83.464	83.109	70.831
131	2	1869	31.003	48.0175	39.87		48.645	44.275	83.96	83.748	71.351
132	2	1868	31.185	48.2125	40.055		48.825	44.525	84.597	84.102	71.797
133	2	1867	31.395	48.4675	40.325		49.065	44.825	85.021	84.668	72.167
134	2	1866	31.591	48.7375	40.543		49.365	45.075	85.374	84.951	72.537
135	2	1865	31.801	48.9775	40.745		49.635	45.325	85.797	85.515	72.906
136	2	1864	31.941	49.2625	41.015		49.875	45.6	86.43	86.008	73.275
137	2	1863	32.081	49.4575	41.295		50.085	45.9	86.851	86.5	73.643
138	2	1862	32.277	49.7275	41.514		50.325	46.25	87.342	87.062	74.085
139	2	1861	32.389	50.1025	41.744		50.655	46.525	87.763	87.483	74.598
140	2	1860	32.543	50.3575	42.043		50.925	46.8	88.252	87.973	75.038
141	2	1859	32.753	50.6125	42.301		51.195	47.1	88.741	88.392	75.403
142	2	1858	32.921	50.9125	42.518		51.435	47.375	89.229	88.951	75.914
143	2	1857	33.103	51.2575	42.789		51.795	47.675	89.787	89.369	76.279
144	2	1856	33.257	51.5275	43.115		52.095	48.025	90.482	90.065	76.788
145	2	1855	33.439	51.8425	43.311		52.395	48.275	90.898	90.551	77.368
146	2	1854	33.579	52.0375	43.596		52.635	48.55	91.522	91.037	77.876
147	2	1853	33.761	52.2775	43.874		52.875	48.85	92.006	91.591	78.237
148	2	1852	33.929	52.5325	44.193		53.175	49.15	92.559	92.214	78.743
149	2	1851	34.125	52.7725	44.417		53.415	49.4	93.111	92.697	79.103
150	2	1850	34.307	53.0425	44.614		53.625	49.75	93.731	93.387	79.751
151	2	1849	34.475	53.2675	44.818		53.895	50	94.212	93.937	80.253
152	2	1848	34.671	53.5975	45.123		54.165	50.275	94.624	94.281	80.612
153	2	1847	34.853	53.8075	45.421		54.375	50.575	95.516	95.173	81.185
154	2	1846	35.035	54.0775	45.618		54.615	50.85	96.064	95.722	81.685
155	2	1845	35.189	54.2875	45.842		54.855	51.1	96.611	96.269	82.113
156	2	1844	35.371	54.5725	46.052		55.065	51.35	97.02	96.747	82.683
157	2	1843	35.532	54.8275	46.276		55.365	51.6	97.498	97.225	83.109
158	2	1842	35.707	55.0975	46.485		55.605	51.85	97.975	97.634	83.464
159	2	1841	35.861	55.2775	46.655		55.785	52.1	98.655	98.315	84.031
160	2	1840	36.043	55.4725	46.905		55.995	52.375	99.131	98.995	84.527
161	2	1839	36.239	55.7875	47.165		56.325	52.675	99.538	99.267	84.809
162	2	1838	36.421	56.0425	47.491		56.595	52.95	100.148	99.877	85.303
163	2	1837	36.603	56.2975	47.685		56.895	53.225	100.487	100.216	85.586
164	2	1836	36.785	56.4925	47.875		57.1	53.425	100.825	100.69	86.008
165	2	1835	36.981	56.7175	48.065		57.285	53.675	101.298	101.163	86.43
166	2	1834	37.177	56.9875	48.365		57.555	53.95	101.839	101.636	86.781
167	2	1833	37.331	57.2275	48.645		57.765	54.225	102.378	102.176	87.272
168	2	1832	37.527	57.4375	48.825		57.945	54.5	102.917	102.917	87.763
169	2	1831	37.737	57.6325	49.045		58.155	54.875	103.724	103.59	88.462
170	2	1830	37.877	57.9175	49.305		58.485	55.125	104.329	104.06	88.811
171	2	1829	38.073	58.2175	49.565		58.785	55.375	104.799	104.53	89.229
172	2	1828	38.213	58.4875	49.875		59.055	55.6	105.268	105.067	89.856
173	2	1827	38.423	58.7875	50.125		59.325	56	106.205	106.071	90.343
174	2	1826	38.605	59.0275	50.325		59.655	56.275	106.807	106.673	90.898
175	2	1825	38.787	59.2225	50.505		59.835	56.55	107.274	107.14	91.383
176	2	1824	38.983	59.5225	50.785		60.075	56.825	107.674	107.541	91.729
177	2	1823	39.151	59.7475	50.985		60.255	57.05	108.274	108.141	92.214
178	2	1822	39.347	59.9725	51.225		60.525	57.325	108.74	108.673	92.628
179	2	1821	39.501	60.2425	51.465		60.765	57.55	109.338	109.272	93.18
180	2	1820	39.627	60.4225	51.695		60.975	57.8	110.003	109.671	93.593
181	2	1819	39.753	60.6625	51.915		61.185	58.1	110.467	110.467	94.212
182	2	1818	39.977	60.8725	52.145		61.425	58.35	110.931	110.799	94.556
183	2	1817	40.159	61.0525	52.345		61.665	58.575	111.461	111.395	95.036
184	2	1816	40.313	61.2475	52.535		61.845	58.825	112.123	112.057	95.585
185	2	1815	40.495	61.4425	52.765		62.055	59.075	112.718	112.586	96.064
186	2	1814	40.607	61.6825	52.995		62.295	59.3	113.312	113.378	96.611
187	2	1813	40.761	61.9675	53.225		62.565	59.55	113.708	113.708	96.884
188	2	1812	40.971	62.2825	53.509		62.865	59.85	114.235	114.169	97.293
189	2	1811	41.139	62.5225	53.685		63.105	60.1	114.63	114.63	97.634
190	2	1810	41.265	62.7925	53.885		63.345	60.375	115.157	115.157	98.111
191	2	1809	41.433	63.0025	54.115		63.555	60.6	115.815	115.88	98.663
192	2	1808	41.643	63.2425	54.398		63.825	60.925	116.274	116.471	99.063
193	2	1807	41.811	63.6175	54.661		64.155	61.2	116.668	116.799	99.674
194	2	1806	41.965	63.9175	54.921		64.455	61.45	117.127	117.259	100.08
195	2	1805	42.119	64.1725	55.111		64.725	61.725	117.521	117.717	100.487
196	2	1804	42.259	64.4725	55.34		65.055	62	118.372	118.503	100.96
197	2	1803	42.427	64.7725	55.652		65.385	62.275	118.83	118.961	101.434
198	2	1802	42.609	65.0875	55.877		65.595	62.525	119.092	119.223	101.771
199	2	1801	42.763	65.3125	56.085		65.775	62.85	119.549	119.68	102.176
200	2	1800	42.945	65.5375	56.325		66.015	63.1	120.202	120.333	102.648
201	2	1799	43.141	65.7775	56.575		66.285	63.325	120.529	120.659	103.052
202	2	1798	43.267	65.9875	56.792		66.525	63.55	121.05	121.246	103.523
203	2	1797	43.463	66.2125	56.995		66.765	63.775	121.702	121.962	103.993
204	2	1796	43.6	66.4375	57.253		67.005	64.15	122.288	122.548	104.597
205	2	1795	43.757	66.6625	57.45		67.245	64.375	122.808	123.068	105
206	2	1794	43.897	66.9175	57.728		67.515	64.675	123.133	123.458	105.402
207	2	1793	44.079	67.1875	57.904		67.755	64.95	123.588	124.042	105.871
208	2	1792	44.177	67.4125	58.142		68.025	65.175	124.172	124.367	106.205
209	2	1791	44.317	67.6825	58.375		68.235	65.4	124.561	124.886	106.606
210	2	1790	44.485	67.8775	58.583		68.475	65.625	125.145	125.728	107.074
211	2	1789	44.611	68.1475	58.841		68.745	65.85	125.728	126.052	107.607
212	2	1788	44.737	68.4325	59.003		68.985	66.075	126.116	126.44	108.007
213	2	1787	44.905	68.7175	59.275		69.285	66.325	126.699	127.022	108.474
214	2	1786	45.052	68.9725	59.526		69.555	66.65	127.668	128.055	109.272
215	2	1785	45.157	69.2425	59.804		69.795	67.05	128.185	128.701	109.737
216	2	1784	45.367	69.5125	60.021		70.035	67.275	128.636	129.023	110.135
217	2	1783	45.521	69.7375	60.175		70.305	67.525	128.959	129.41	110.401
218	2	1782	45.675	69.9775	60.345		70.485	67.75	129.346	129.668	110.865
219	2	0	45.787	70.2025	60.605		70.725	68	129.797	130.247	111.196
220	2	1780	45.913	70.4275	60.775		70.935	68.25	130.247	130.698	111.527
221	2	1779	46.095	70.7125	61.015		71.205	68.5	130.698	131.084	111.958
222	2	1778	46.207	70.9375	61.165		71.445	68.75	131.019	131.47	112.255
223	2	1777	46.3	71.1625	61.415		71.655	69	131.598	132.112	112.718
224	2	1776	46.4	71.3875	61.635		71.955	69.25	132.176	132.497	113.006
225	2	1775	46.599	71.6725	61.835		72.165	69.5	132.626	133.011
226	2	1774	46.697	71.89	62.065		72.405	69.825	133.139	133.652
227	2	1773	46.865	72.05	62.275		72.585	70.075	133.524	134.037
228	2	1772	47.005	72.3475	62.475		72.855	70.3	133.844	134.549
229	2	1771	47.117	72.6025	62.765		73.155	70.575	134.485	135.061
230	2	1770	47.23	72.8725	62.925		73.395	70.875	134.933	135.509
231	2	1769	47.327	73.1275	63.145		73.665	71.125	135.317	136.021
232	2	1768	47.467	73.4875	63.385		74.025	71.35	136.021	136.66
233	2	1767	47.621	73.6975	63.565		74.235	71.55	136.468	137.107
234	2	1766	47.789	73.9825	63.775		74.505	71.8	136.852	137.618
235	2	1765	47.873	74.2675	63.995		74.745	72	137.235	138.065
236	2	1764	47.999	74.4775	64.245		74.955	72.275	137.682	138.511
237	2	1763	48.097	74.7625	64.485		75.285	72.55	138.001	138.83
238	2	1762	48.209	75.0175	64.625		75.495	72.775	138.702	139.594
239	2	1761	48.307	75.1825	64.815		75.675	73	139.148	140.04
240	2	1760	48.419	75.4225	65.115		75.915	73.25	139.785	140.613
241	2	1759	48.545	75.6925	65.325		76.215	73.6	140.231	141.121
242	2	1758	48.671	75.9625	65.555		76.515	73.825	140.74	141.82
243	2	1757	48.797	76.1575	65.715		76.755	74.025	141.249	142.138
244	2	1756	48.909	76.3375	65.895		76.905	74.25	141.884	142.773
245	2	1755	49.021	76.55	66.125		77.175	74.475	142.392	143.344
246	2	1754	49.119	76.72	66.305		77.355	74.775	142.836	143.788
247	2	1753	49.259	76.8775	66.493		77.505	75	143.281	144.105
248	2	1752	49.357	77.1175	66.625		77.715	75.2	143.661	144.422
249	2	1751	49.483	77.4325	66.92		77.985	75.425	144.105	145.055
250	2	1750	49.623	77.7175	67.115		78.345	75.775	144.422	145.372
251	2	1749	49.763	77.9725	67.305		78.555	76.025	144.929	145.941
252	2	1748	49.87	78.1675	67.475		78.735	76.25	145.688	146.574
253	2	1747	50	78.4075	67.695		78.945	76.475	146.068	147.016
254	2	1746	50.218	78.6325	67.865		79.155	76.775	146.763	147.838
255	2	1745	50.35	78.8575	68.074		79.365	77.025	147.016	148.09
256	2	1744	50.491	79.0975	68.275		79.635	77.275	147.395	148.658
257	2	1743	50.589	79.3675	68.535		79.875	77.525	147.964	149.163
258	2	1742	50.715	79.5775	68.725		80.085	77.775	148.595	149.793
259	2	1741	50.883	79.8475	68.983		80.433	78.075	149.037	150.171
260	2	1740	51.037	80.1625	69.363		80.715	78.375	149.667	150.864
261	2	1739	51.177	80.4325	69.661		80.955	78.725	150.045	151.431
262	2	1738	51.303	80.6275	69.851		81.165	78.95	150.486	151.745
263	2	1737	51.415	80.8525	70.035		81.405	79.2	150.864	152.123
264	2	1736	51.52	81.1375	70.245		81.645	79.425	151.305	152.626
265	2	1735	51.597	81.288	70.445		81.82	79.75	151.871	153.066
266	2	1734	51.709	81.453	70.632		81.975	79.975	152.249	153.568
267	2	1733	51.835	81.6	70.836		82.185	80.225	152.752	154.134
268	2	1732	51.961	81.9025	71.025		82.455	80.5	153.317	154.636
269	2	1731	52.073	82.0975	71.195		82.665	80.75	153.694	155.075
270	2	1730	52.171	82.2925	71.475		82.875	80.975	154.259	155.702
271	2	1729	52.339	82.5775	71.695		83.115	81.325	154.761	156.329
272	2	1728	52.451	82.8025	71.925		83.355	81.575	155.263	156.83
273	2	1727	52.591	82.9825	72.115		83.535	81.825	155.639	157.143
274	2	1726	52.717	83.2675	72.375		83.805	82.05	156.015	157.456
275	2	1725	52.815	83.5675	72.585		84.105	82.325	156.517	158.082
276	2	1724	52.941	83.8075	72.715		84.315	82.55	156.955	158.52
277	2	1723	53.053	84.0475	72.955		84.555	82.8	157.393	159.02
278	2	1722	53.193	84.2425	73.165		84.765	83.025	157.957	159.52
279	2	1721	53.305	84.4075	73.315		84.945	83.275	158.394	159.957
280	2	1720	53.431	84.6325	73.555		85.155	83.5	158.895	160.457
281	2	1719	53.529	84.8125	73.715		85.335	83.75	159.395	161.018
282	2	1718	53.655	85.0525	73.935		85.575	84	159.77	161.517
283	2	1717	53.753	85.2475	74.135		85.785	84.2	160.269	161.892
284	2	1716	53.921	85.5025	74.395		86.025	84.45	160.706	162.39
285	2	1715	54.019	85.6825	74.585		86.235	84.675	161.205	162.889
286	2	1714	54.131	85.9075	74.765		86.415	84.85	161.58	163.325
287	2	1713	54.243	86.1625	74.975		86.655	85.15	162.141	163.823
288	2	1712	54.425	86.3725	75.225		86.895	85.45	162.577	164.197
289	2	1711	54.593	86.5375	75.405		87.075	85.7	163.013	164.819
290	2	1710	54.719	86.7325	75.635		87.285	85.95	163.636	165.441
291	2	1709	54.831	86.9275	75.855		87.465	86.2	164.072	165.938
292	2	1708	54.929	87.1525	76.065		87.705	86.4	164.632	166.559
293	2	1707	55.013	87.3175	76.185		87.885	86.6	165.005	166.808
294	2	1706	55.111	87.5275	76.355		88.065	86.8	165.441	167.242
295	2	1705	55.251	87.7525	76.515		88.275	87.025	165.814	167.801
296	2	1704	55.391	87.9925	76.775		88.545	87.25	166.186	168.111
297	2	1703	55.489	88.2025	76.915		88.725	87.475	166.683	168.669
298	2	1702	55.615	88.4575	77.145		88.995	87.725	167.056	169.103
299	2	1701	55.741	88.7725	77.385		89.235	87.925	167.428	169.351
300	2	1700	55.853	88.9825	77.535		89.475	88.15	167.863	169.847
301	2	1699	55.937	89.2225	77.685		89.715	88.35	168.297	170.281
302	2	1698	56.035	89.4325	77.895		89.895	88.575	168.917	170.9
303	2	1697	56.231	89.6725	78.155		90.135	88.875	169.475	171.519
304	2	1696	56.371	89.9575	78.335		90.405	89.05	169.847	172.013
305	2	1695	56.497	90.1525	78.495		90.585	89.3	170.219	172.323
306	2	1694	56.602	90.4075	78.755		90.855	89.5	170.9	172.755
307	2	1693	56.679	90.6025	78.985		91.065	89.725	171.209	173.188
308	2	1692	56.819	90.8425	79.165		91.275	89.925	171.642	173.559
309	2	1691	56.959	91.0825	79.395		91.485	90.3	171.828
310	2	1690	57.085	91.2775	79.595		91.725	90.55	172.261
311	2	1689	57.253	91.4575	79.825		91.905	90.75	172.632
312	2	1688	57.379	91.6225	80.025		92.085	91	173.126
313	2	1687	57.505	91.8325	80.185		92.295	91.225	173.682
314	2	1686	57.603	92.0425	80.445		92.505	91.45	174.115
315	2	1685	57.771	92.3125	80.585		92.685	91.775	174.423
316	2	1684	57.911	92.5375	80.825		92.955	92	174.979
317	2	1683	57.995	92.7175	80.985		93.195	92.25	175.411
318	2	1682	58.121	92.8975	81.245		93.375	92.55	175.966
319	2	1681	58.275	93.1525	81.475		93.675	92.775	176.335
320	2	1680	58.415	93.4075	81.695		93.885	92.975	176.828
321	2	1679	58.513	93.7075	81.885		94.215	93.225	177.506
322	2	1678	58.653	93.9625	82.145		94.425	93.55	177.876
323	2	1677	58.737	94.1875	82.285		94.575	93.775	178.43
324	2	1676	58.891	94.4275	82.535		94.845	93.975	178.799
325	2	1675	59.017	94.6525	82.715		95.025	94.325	179.291
326	2	1674	59.143	94.8625	82.935		95.235	94.525	179.721
327	2	1673	59.255	95.0725	83.115		95.535	94.75	180.152
328	2	1672	59.367	95.3125	83.345		95.775	94.95	180.582
329	2	1671	59.465	95.5675	83.575		96.015	95.2	181.012
330	2	1670	59.591	95.7775	83.735		96.225	95.475	181.503
331	2	1669	59.745	96.0475	83.975		96.465	95.7	181.81
332	2	1668	59.871	96.212	84.145		96.675	95.875	182.178
333	2	1667	59.997	96.3925	84.415		96.855	96.1	182.547
334	2	1666	60.095	96.6175	84.535		97.035	96.35	182.915
335	2	1665	60.179	96.8425	84.695		97.215	96.55	183.344
336	2	1664	60.305	97.0825	84.865		97.545	96.775	183.773
337	2	1663	60.403	97.2775	85.025		97.755	97	184.325
338	2	1662	60.515	97.4725	85.215		97.935	97.225	184.815
339	2	1661	60.627	97.6525	85.395		98.115	97.45	185.121
340	2	1660	60.7474	97.8925	85.605		98.325	97.775	185.55
341	2	1659	60.8736	98.1775	85.825		98.565	98	186.162
342	2	1658	61.0251	98.3425	86.015		98.775	98.225	186.791
343	2	1657	61.1463	98.5525	86.235		99.015	98.525	187.201
344	2	1656	61.3383	98.8075	86.465		99.225	98.8	187.813
345	2	1655	61.4393	98.9725	86.625		99.375	99.025	188.118
346	2	1654	61.5705	99.1975	86.805		99.645	99.225	188.668
347	2	1653	61.7221	99.3775	86.965		99.855	99.425	189.401
348	2	1652	61.8635	99.6175	87.155		100.065	99.65	189.828
349	2	1651	61.9543	99.7975	87.355		100.245	99.9	190.316
350	2	1650	62.0654	100.037	87.535		100.485	100.15	190.926
351	2	1649	62.1968	100.293	87.745		100.695	100.4	191.353
352	2	1648	62.2978	100.578	87.985		100.965	100.6	191.84
353	2	1647	62.4594	100.787	88.175		101.175	100.825	192.693
354	2	1646	62.5806	101.028	88.365		101.475	101.125	193.12
355	2	1645	62.6917	101.252	88.585		101.655	101.35	193.546
356	2	1644	62.8128	101.493	88.805		101.895	101.575	193.85
357	2	1643	62.9038	101.718	89.015		102.105	101.8	194.308
358	2	1642	63.0451	101.905	89.185		102.285	102.125	194.823
359	2	1641	63.126	102.047	89.335		102.495	102.325	195.492
360	2	1640	63.2876	102.272	89.545		102.705	102.55	195.978
361	2	1639	63.4087	102.543	89.725		102.975	102.8	196.646
362	2	1638	63.5502	102.797	89.955		103.245	103	197.011
363	2	1637	63.7017	103.022	90.175		103.485	103.225	197.375
364	2	1636	63.8026	103.233	90.325		103.695	103.425	197.848
365	2	1635	63.9138	103.532	90.485		103.965	103.7	198.103
366	2	1634	64.0349	103.713	90.635		104.175	103.925	198.467
367	2	1633	64.1763	103.922	90.865		104.355	104.15	199.027
368	2	1632	64.3076	104.162	91.065		104.535	104.35	199.733
369	2	1631	64.449	104.388	91.265		104.745	104.55	200.112
370	2	1630	64.54	104.582	91.475		105.015	104.775	200.736
371	2	1629	64.651	104.793	91.645		105.195	104.975	201.375
372	2	1628	64.7823	105.002	91.865		105.405	105.2	201.726
373	2	1627	64.8632	105.257	92.075		105.705	105.425	202.162
374	2	1626	65.0045	105.481	92.285		105.915	105.625	202.888
375	2	1625	65.1055	105.671	92.465		106	105.825	203.251
376	2	1624	65.2167	105.805	92.635		106.215	106.025	203.613
377	2	1623	65.3581	106.007	92.835		106.455	106.25	204.157
378	2	1622	65.4792	106.188	93.025		106.635	106.45	204.64
379	2	1621	65.6106	106.427	93.225		106.875	106.725	205.059
380	2	1620	65.7216	106.653	93.425		107.085	106.975	205.425
381	2	1619	65.8328	106.862	93.635		107.295	107.2	205.908
382	2	1618	65.9438	107.058	93.825		107.505	107.475	206.27
383	2	1617	66.065	107.328	94.065		107.805	107.675	206.752
384	2	1616	66.166	107.507	94.255		107.985	107.875	207.114
385	2	1615	66.3075	107.778	94.435		108.195	108.1	207.536
386	2	1614	66.4085	108.062	94.715		108.495	108.325	208.184
387	2	1613	66.5397	108.317	94.925		108.765	108.6	208.681
388	2	1612	66.6509	108.513	95.055		108.945	108.825	209.033
389	2	1611	66.7519	108.752	95.265		109.155	109.05	209.343
390	2	1610	66.8932	108.9	95.455		109.335	109.25	209.945
391	2	1609	66.9942	109.082	95.695		109.545	109.45	210.486
392	2	1608	67.0952	109.278	95.8		109.695	109.675	210.787
393	2	1607	67.2164	109.517	95.955		109.965	109.925	211.388
394	2	1606	67.2973	109.757	96.165		110.205	110.15	211.869
395	2	1605	67.4083	110.028	96.375		110.475	110.35	212.169
396	2	1604	67.5498	110.252	96.535		110.685	110.55	212.538
397	2	1603	67.6205	110.478	96.785		110.925	110.775	213.01
398	2	1602	67.7315	110.7	96.996		111.105	110.95	213.502
399	2	1601	67.8325	110.912	97.165		111.315	111.275	214.09
400	2	1600	67.974	111.183	97.375		111.615	111.5	214.45
401	2	1599	68.075	111.438	97.575		111.855	111.675	214.81
402	2	1598	68.2365	111.618	97.735		112.065	111.9	215.29
403	2	1597	68.3477	111.873	97.935		112.305	112.1	215.769
404	2	1596	68.4689	112.149	98.125		112.515	112.325	216.308
405	2	1595	68.5496	112.334	98.325		112.725	112.55	216.603
406	2	1594	68.7011	112.547	98.535		112.995	112.825	217.207
407	2	1593	68.8426	112.728	98.785		113.205	113.1	217.805
408	2	1592	68.9536	112.983	98.995		113.445	113.325	218.284
409	2	1591	69.1051	113.162	99.195		113.625	113.55	218.702
410	2	1590	69.2365	113.403	99.375		113.835	113.775	219.061
411	2	1589	69.4183	113.612	99.605		114.045	114.025	219.42
412	2	1588	69.5395	113.868	99.775		114.255	114.275	220.077
413	2	1587	69.6607	114.108	99.995		114.525	114.55	220.495
414	2	1586	69.7819	114.317	100.225		114.765	114.75	221.152
415	2	1585	69.8929	114.543	100.425		115.035	115	221.63
416	2	1584	70.0242	114.752	100.615		115.215	115.225	221.988
417	2	1583	70.15	114.963	100.795		115.425	115.475	222.346
418	2	1582	70.201	115.127	100.955		115.6	115.675	222.883
419	2	1581	70.3273	115.353	101.185		115.755	115.9	223.479
420	2	1580	70.4686	115.562	101.475		115.965	116.125	223.717
421	2	1579	70.585	115.847	101.635		116.235	116.35	224.313
422	2	1578	70.653	116.073	101.785		116.505	116.6	224.73
423	2	1577	70.802	116.343	102.025		116.745	116.85	225.087
424	2	1576	70.8828	116.522	102.225		116.955	117.05	225.564
425	2	1575	71.0443	116.763	102.365		117.165	117.3	226.218
426	2	1574	71.1555	117.002	102.595		117.435	117.55	226.754
427	2	1573	71.2665	117.213	102.805		117.615	117.775	227.17
428	2	1572	71.4079	117.468	102.985		117.915	118	227.527
429	2	1571	71.5292	117.707	103.175		118.155	118.225	228.002
430	2	1570	71.6302	117.873	103.345		118.335	118.425	228.418
431	2	1569	71.8019	118.082	103.535		118.515	118.65	229.071
432	2	1568	71.9331	118.263	103.725		118.665	118.85	229.546
433	2	1567	72.0443	118.457	103.895		118.845	119.05	229.962
434	2	1566	72.1655	118.653	104.075		118.995	119.3	230.436
435	2	1565	72.3068	118.907	104.265		119.295	119.5	230.789
436	2	1564	72.4381	119.147	104.475		119.535	119.725	231.267
437	2	1563	72.5392	119.328	104.625		119.745	119.95	231.86
438	2	1562	72.6705	119.597	104.835		119.985	120.15	232.334
439	2	1561	72.7613	119.808	105.045		120.225	120.325	232.689
440	2	1560	72.8927	120.078	105.235		120.465	120.525	233.163
441	2	1559	73.034	120.243	105.415		120.675	120.725	233.518
442	2	1558	73.1249	120.468	105.595		120.855	120.95	234.169
443	2	1557	73.2159	120.632	105.775		121.035	121.225	234.642
444	2	1556	73.3067	120.828	106.015		121.245	121.45	234.997
445	2	1555	73.4279	121.067	106.175		121.545	121.65	235.352
446	2	1554	73.5694	121.278	106.395		121.695	121.875	235.707
447	2	1553	73.6703	121.502	106.605		121.905	122.15	236.121
448	2	1552	73.826	121.668	106.775		122.115	122.35	236.711
449	2	1551	73.965	121.907	106.975		122.355	122.575	237.125
450	2	1550	74.0845	122.147	107.135		122.595	122.825	237.774
451	2	1549	74.18	122.373	107.345		122.805	123.075	238.305
452	2	1548	74.2865	122.582	107.545		123.015	123.325	238.895
453	2	1547	74.3875	122.778	107.725		123.195	123.55	239.367
454	2	1546	74.5289	122.972	107.925		123.405	123.8	239.957
455	2	1545	74.7107	123.153	108.065		123.585	124.025	240.369
456	2	1544	74.8521	123.332	108.225		123.795	124.225	241.135
457	2	1543	74.9429	123.588	108.425		124.065	124.45	241.488
458	2	1542	75.0641	123.843	108.665		124.305	124.65	242.018
459	2	1541	75.1853	124.082	108.855		124.515	124.95	242.842
460	2	1540	75.2863	124.323	109.035		124.755	125.125	243.312
461	2	1539	75.4378	124.472	109.215		124.935	125.325	243.959
462	2	1538	75.5793	124.698	109.395		125.115	125.55	244.312
463	2	1537	75.7105	124.922	109.585		125.325	125.775	244.84
464	2	1536	75.852	125.207	109.825		125.595	126.025	245.252
465	2	1535	75.9327	125.373	110.005		125.835	126.225	245.959
466	2	1534	76.0742	125.567	110.215		126.015	126.475	246.367
467	2	1533	76.1852	125.793	110.415		126.225	126.7	246.954
468	2	1532	76.2862	125.987	110.585		126.405	126.95	247.247
469	2	1531	76.3974	126.168	110.815		126.645	127.15	247.716
470	2	1530	76.5489	126.422	110.985		126.885	127.375	248.302
471	2	1529	76.6701	126.618	111.125		127.095	127.6	248.83
472	2	1528	76.8316	126.888	111.335		127.305	127.875	249.415
473	2	1527	76.9428	127.112	111.545		127.515	128.075	249.825
474	2	1526	77.1145	127.338	111.775		127.755	128.275	250.235
475	2	1525	77.2155	127.532	111.985		127.965	128.5	250.644
476	2	1524	77.3568	127.713	112.165		128.115	128.775	251.288
477	2	1523	77.4477	127.892	112.295		128.325	128.975	251.743
478	2	1522	77.5487	128.102	112.485		128.535	129.15	252.142
479	2	1521	77.68	128.357	112.715		128.775	129.35	252.707
480	2	1520	77.7709	128.493	112.855		128.925	129.6	253.1
481	2	1519	77.8719	128.688	113.035		129.135	129.85	253.801
482	2	1518	77.9931	128.898	113.195		129.345	130.075	254.209
483	2	1517	78.1346	129.137	113.405		129.555	130.275	254.618
484	2	1516	78.2456	129.287	113.575		129.735	130.475	255.318
485	2	1515	78.3264	129.542	113.765		129.975	130.725	255.668
486	2	1514	78.4376	129.768	113.985		130.185	130.975	256.309
487	2	1513	78.5486	130.053	114.195		130.425	131.15	256.659
488	2	1512	78.68	130.232	114.355		130.635	131.375	257.125
489	2	1511	78.8213	130.458	114.575		130.845	131.675	257.532
490	2	1510	78.9627	130.647	114.765		131.115	131.875	258.056
491	2	1509	79.084	130.885	114.925		131.325	132.125	258.58
492	2	1508	79.2152	131.058	115.145		131.505	132.375	258.987
493	2	1507	79.3364	131.343	115.365		131.745	132.6	259.511
494	2	1506	79.4274	131.55	115.535		131.925	132.8	260.034
495	2	1505	79.5687	131.725	115.715		132.135	133.025	260.615
496	2	1504	79.6899	131.966	115.875		132.315	133.3	261.08
497	2	1503	79.8213	132.182	116.075		132.555	133.55	261.487
498	2	1502	79.9323	132.391	116.225		132.825	133.75	261.835
499	2	1501	80.0738	132.578	116.425		133.005	133.975	262.474
500	2	1500	80.1848	132.812	116.655		133.245	134.25	262.938
501	2	1499	80.306	133.067	116.885		133.485	134.525	263.634
502	2	1498	80.42	133.278	117.085		133.665	134.75	264.04
503	2	1497	80.493	133.442	117.275		133.845	134.95	264.562
504	2	1496	80.609	133.623	117.415		134.025	135.15	265.025
505	2	1495	80.7605	133.817	117.615		134.235	135.375	265.431
506	2	1494	80.8615	134.042	117.815		134.415	135.6	266.01
507	2	1493	80.9625	134.208	117.965		134.595	135.8	266.531
508	2	1492	81.0636	134.387	118.125		134.835	136	266.878
509	2	1491	81.1847	134.597	118.325		135.015	136.325	267.283
510	2	1490	81.3059	134.822	118.525		135.225	136.55	267.746
511	2	1489	81.4373	134.988	118.745		135.405	136.875	268.324
512	2	1488	81.5686	135.227	118.945		135.645	137.075	268.613
513	2	1487	81.7301	135.438	119.205		135.855	137.325	269.248
514	2	1486	81.8615	135.602	119.365		136.035	137.575	269.537
515	2	1485	81.9827	135.812	119.535		136.215	137.775	270.114
516	2	1484	82.0938	135.963	119.685		136.395	137.975	270.461
517	2	1483	82.2452	136.202	119.865		136.635	138.175	270.922
518	2	1482	82.3462	136.382	120.005		136.815	138.35	271.326
519	2	1481	82.4472	136.577	120.175		136.995	138.6	271.845
520	2	1480	82.5684	136.773	120.395		137.205	138.8	272.191
521	2	1479	82.6796	136.968	120.555		137.385	139.025	272.768
522	2	1478	82.8209	137.208	120.795		137.625	139.225	273.229
523	2	1477	82.9523	137.387	120.965		137.805	139.45	273.689
524	2	1476	83.094	137.597	121.175		138.045	139.675	274.035
525	2	1475	83.225	137.808	121.355		138.255	139.875	274.611
526	2	1474	83.3461	138.032	121.575		138.465	140.125	274.956
527	2	1473	83.437	138.198	121.735		138.645	140.3	275.301
528	2	1472	83.5683	138.377	121.885		138.825	140.5	275.704
529	2	1471	83.7097	138.542	122.025		139.035	140.7	276.164
530	2	1470	83.831	138.782	122.205		139.245	140.9	276.738
531	2	1469	83.9522	139.023	122.405		139.485	141.125	277.313
532	2	1468	84.0734	139.262	122.595		139.695	141.35	277.772
533	2	1467	84.1844	139.472	122.825		139.905	141.575	278.117
534	2	1466	84.2956	139.667	123.025		140.085	141.775	278.519
535	2	1465	84.4066	139.877	123.235		140.295	142.025	278.863
536	2	1464	84.5076	140.058	123.375		140.505	142.225	279.379
537	2	1463	84.6188	140.282	123.535		140.745	142.425	279.838
538	2	1462	84.7601	140.523	123.735		140.985	142.625	280.24
539	2	1461	84.8713	140.702	123.915		141.135	142.9	280.768
540	2	1460	84.9823	140.871	124.085		141.345	143.125	281.214
541	2	1459	85.1238	141.183	124.325		141.645	143.35	281.615
542	2	1458	85.245	141.438	124.555		141.885	143.55	282.13
543	2	1457	85.356	141.678	124.725		142.185	143.825	282.588
544	2	1456	85.4874	141.993	124.935		142.395	144.05	282.989
545	2	1455	85.5984	142.218	125.125		142.635	144.25	283.389
546	2	1454	85.6994	142.488	125.285		142.935	144.45	283.79
547	2	1453	85.8409	142.683	125.485		143.115	144.675	284.361
548	2	1452	85.9924	142.938	125.715		143.385	144.9	284.761
549	2	1451	86.1136	143.162	125.945		143.655	145.15	285.333
550	2	1450	86.2549	143.343	126.125		143.835	145.425	285.733
551	2	1449	86.3661	143.553	126.315		144.015	145.625	286.075
552	2	1448	86.4873	143.762	126.475		144.195	145.8	286.532
553	2	1447	86.5983	143.972	126.645		144.405	146.025	286.988
554	2	1446	86.77	144.213	126.865		144.675	146.275	287.331
555	2	1445	86.871	144.438	127.055		144.915	146.475	287.844
556	2	1444	87.0125	144.678	127.255		145.125	146.775	288.243
557	2	1443	87.1437	144.887	127.445		145.335	147	288.756
558	2	1442	87.275	145.097	127.645		145.515	147.2	289.269
559	2	1441	87.3761	145.3	127.955		145.725	147.425	289.668
560	2	1440	87.5376	145.51	128.105		145.905	147.625	290.123
561	2	1439	87.6589	145.667	128.315		146.115	147.875	290.692
562	2	1438	87.7901	145.938	128.515		146.385	148.1	291.091
563	2	1437	87.9013	146.192	128.695		146.595	148.3	291.489
564	2	1436	88.0123	146.417	128.865		146.805	148.5	292.171
565	2	1435	88.1235	146.657	129.035		147.045	148.725	292.74
566	2	1434	88.275	146.898	129.195		147.315	149	293.251
567	2	1433	88.386	147.107	129.355		147.495	149.225	293.649
568	2	1432	88.5072	147.317	129.515		147.735	149.475	294.16
569	2	1431	88.6285	147.588	129.725		147.979	149.675	294.671
570	2	1430	88.7597	147.843	129.915		148.15	149.875	295.408
571	2	1429	88.8911	148.015	130.095		148.365	150.2	295.805
572	2	1428	89.0224	148.2	130.325		148.665	150.4	296.429
573	2	1427	89.1739	148.458	130.475		148.935	150.6	296.769
574	2	1426	89.3354	148.697	130.675		149.145	150.875	297.279
575	2	1425	89.4869	148.907	130.875		149.385	151.1	297.902
576	2	1424	89.6486	149.102	131.085		149.565	151.3	298.298
577	2	1423	89.7596	149.312	131.265		149.745	151.65	298.864
578	2	1422	89.8505	149.523	131.475		149.955	151.85	299.26
579	2	1421	89.9718	149.702	131.665		150.165	152.025	299.713
580	2	1420	90.1333	149.928	131.865		150.435	152.225	299.946
581	2	1419	90.305	150.123	132.065		150.62	152.55	300.391
582	2	1418	90.406	150.317	132.275		150.788	152.775	301.182
583	2	1417	90.5576	150.558	132.515		151.035	153	301.521
584	2	1416	90.7191	150.768	132.725		151.275	153.225	301.917
585	2	1415	90.8404	151.053	132.955		151.485	153.475	302.481
586	2	1414	90.9514	151.262	133.115		151.695	153.675	302.933
587	2	1413	91.0524	151.502	133.315		151.935	153.925	303.553
588	2	1412	91.1636	151.683	133.475		152.115	154.15	304.004
589	2	1411	91.2645	151.847	133.625		152.355	154.375	304.568
590	2	1410	91.3958	152.028	133.815		152.46	154.575	305.132
591	2	1409	91.4868	152.174	133.975		152.625	154.8	305.751
592	2	1408	91.5877	152.327	134.125		152.805	155	306.089
593	2	1407	91.7392	152.583	134.325		152.985	155.3	306.821
594	2	1406	91.8807	152.762	134.495		153.195	155.525	307.158
595	2	1405	92.0119	153.032	134.675		153.435	155.725	307.44
596	2	1404	92.1231	153.257	134.895		153.645	156.075	308.058
597	2	1403	92.2442	153.468	135.085		153.855	156.325	308.62
598	2	1402	92.3554	153.632	135.285		154.065	156.55	309.182
599	2	1401	92.4968	153.827	135.425		154.275	156.775	309.575
600	2	1400	92.6381	154.113	135.635		154.515	156.975	310.193
601	2	1399	92.7291	154.292	135.825		154.695	157.2	310.586
602	2	1398	92.8705	154.518	136.025		154.965	157.425	311.035
603	2	1397	92.9715	154.7	136.215		155.175	157.625	311.708
604	2	1396	93.1028	154.952	136.425		155.355	157.925	312.437
605	2	1395	93.2542	155.208	136.645		155.625	158.175	312.829
606	2	1394	93.3552	155.447	136.815		155.895	158.45	313.389
607	2	1393	93.5067	155.657	137.035		156.115	158.7	314.005
608	2	1392	93.6077	155.822	137.245		156.272	158.925	314.733
609	2	1391	93.7592	155.988	137.425		156.437	159.15	315.124
610	2	1390	93.8804	156.153	137.565		156.619	159.325	315.628
611	2	1389	93.9613	156.347	137.725		156.817	159.55	316.075
612	2	1388	94.0724	156.588	137.885		157.015	159.825	316.466
613	2	1387	94.1733	156.857	138.075		157.279	160	316.969
614	2	1386	94.2541	157.037	138.295		157.477	160.2	317.304
615	2	1385	94.3551	157.202	138.475		157.675	160.4	317.807
616	2	1384	94.4865	157.442	138.655		157.856	160.625	318.253
617	2	1383	94.648	157.593	138.855		158.038	160.925	318.756
618	2	1382	94.7692	157.757	139.015		158.236	161.1	319.146
619	2	1381	94.8602	157.968	139.185		158.417	161.3	319.4
620	2	1380	94.9612	158.162	139.325		158.648	161.475	319.76
621	2	1379	95.0924	158.417	139.515		158.879	161.675	320.206
622	2	1378	95.2036	158.657	139.705		159.11	161.875	320.763
623	2	1377	95.3147	158.898	139.895		159.391	162.05	321.097
624	2	1376	95.4359	159.153	140.105		159.638	162.225	321.543
625	2	1375	95.5268	159.363	140.275		159.82	162.4	321.877
626	2	1374	95.6681	159.588	140.465		160.034	162.575	322.322
627	2	1373	95.7893	159.782	140.655		160.232	162.925	322.767
628	2	1372	95.8903	160.007	140.865		160.43	163.15	323.268
629	2	1371	96.0216	160.232	141.085		160.628	163.35	323.657
630	2	1370	96.1428	160.428	141.275		160.843	163.575	324.102
631	2	1369	96.254	160.623	141.505		161.074	163.8	324.547
632	2	1368	96.3448	160.847	141.695		161.305	164	324.991
633	2	1367	96.4357	161.028	141.855		161.486	164.2	325.38
634	2	1366	96.5267	161.222	142.045		161.651	164.4	325.768
635	2	1365	96.668	161.417	142.225		161.833	164.575	326.268
636	2	1364	96.7994	161.583	142.425		162.031	164.8	326.656
637	2	1363	96.9004	161.778	142.625		162.229	165.025	326.934
638	2	1362	97.0014	162.002	142.805		162.427	165.225	327.488
639	2	1361	97.1529	162.183	142.965		162.625	165.425	327.877
640	2	1360	97.2336	162.407	143.155		162.823	165.6	328.375
641	2	1359	97.3246	162.618	143.325		163.037	165.825	328.763
642	2	1358	97.4558	162.798	143.515		163.235	166.125	329.262
643	2	1357	97.567	162.993	143.695		163.433	166.325	329.594
644	2	1356	97.6881	163.218	143.905		163.598	166.525	330.092
645	2	1355	97.8093	163.412	144.075		163.796	166.7	330.424
646	2	1354	97.9305	163.607	144.265		163.978	167	330.811
647	2	1353	98.0517	163.803	144.465		164.209	167.225	331.199
648	2	1352	98.183	164.012	144.635		164.44	167.425	331.53
649	2	1351	98.3144	164.238	144.825		164.72	167.625	332.028
650	2	1350	98.3952	164.447	145.005		164.902	167.875	332.415
651	2	1349	98.4861	164.643	145.175		165.1	168.075	332.801
652	2	1348	98.6072	164.868	145.405		165.347	168.3	333.354
653	2	1347	98.7284	165.107	145.615		165.562	168.5	333.851
654	2	1346	98.8194	165.317	145.815		165.743	168.775	334.292
655	2	1345	98.9406	165.512	146.015		165.925	169.025	334.789
656	2	1344	99.0921	165.738	146.195		166.123	169.25	335.064
657	2	1343	99.193	165.903	146.365		166.354	169.45	335.835
658	2	1342	99.3143	166.097	146.515		166.535	169.675	336.222
659	2	1341	99.385	166.292	146.715		166.733	169.85	336.663
660	2	1340	99.496	166.488	146.895		166.948	170.075	337.324
661	2	1339	99.6072	166.697	147.075		167.129	170.3	337.679
662	2	1338	99.7082	166.877	147.285		167.311	170.525	338.094
663	2	1337	99.8294	167.148	147.485		167.575	170.85	338.369
664	2	1336	99.9506	167.327	147.675		167.723	171.025	338.754
665	2	1335	100.063	167.583	147.865		167.971	171.25	339.249
666	2	1334	100.13	167.792	148.045		168.218	171.425	339.689
667	2	1333	100.23	167.958	148.215		168.383	171.625	340.184
668	2	1332	100.32	168.167	148.415		168.614	171.85	340.623
669	2	1331	100.418	168.333	148.615		168.812	172.05	341.063
670	2	1330	100.517	168.468	148.736		168.994	172.25	341.612
671	2	1329	100.612	168.632	148.875		169.05	172.45	342.105
672	2	1328	100.689	168.798	149.065		169.175	172.65	342.599
673	2	1327	100.796	168.993	149.235		169.39	172.875	343.202
674	2	1326	100.886	169.188	149.486		169.588	173.125	343.476
675	2	1325	100.977	169.442	149.653		169.868	173.35	343.97
676	2	1324	101.076	169.653	149.765		170.099	173.65	344.353
677	2	1323	101.192	169.817	149.975		170.248	173.875	344.737
678	2	1322	101.3	170	150.133		170.429	174.075	345.175
679	2	1321	101.409	170.11	150.293		170.561	174.25	345.448
680	2	1320	101.516	170.298	150.497		170.759	174.45	345.722
681	2	1319	101.624	170.523	150.654		170.974	174.65	346.16
682	2	1318	101.724	170.702	150.869		171.139	174.9	346.597
683	2	1317	101.814	170.912	151.015		171.353	175.125	346.871
684	2	1316	101.921	171.137	151.225		171.551	175.325	347.253
685	2	1315	102.038	171.303	151.425		171.749	175.525	347.855
686	2	1314	102.174	171.528	151.605		171.931	175.725	348.182
687	2	1313	102.263	171.722	151.785		172.162	175.975	348.729
688	2	1312	102.362	171.917	151.965		172.343	176.175	349.056
689	2	1311	102.462	172.097	152.175		172.558	176.375	349.329
690	2	1310	102.552	172.278	152.335		172.723	176.6	349.766
691	2	1309	102.65	172.502	152.515		172.97	176.8	350.311
692	2	1308	102.749	172.713	152.695		173.185	177	350.693
693	2	1307	102.876	172.952	152.905		173.366	177.2	351.075
694	2	1306	102.984	173.118	153.075		173.515	177.425	351.511
695	2	1305	103.08	173.282	153.215		173.729	177.675	351.947
696	2	1304	103.15	173.477	153.425		173.911	177.85	352.437
697	2	1303	103.245	173.718	153.585		174.158	178.025	352.763
698	2	1302	103.362	173.898	153.755		174.34	178.25	353.308
699	2	1301	103.487	174.077	153.925		174.488	178.45	353.58
700	2	1300	103.578	174.257	154.105		174.703	178.725	354.341
701	2	1299	103.695	174.468	154.305		174.917	179	354.776
702	2	1298	103.847	174.662	154.505		175.115	179.25	355.103
703	2	1297	103.938	174.873	154.725		175.33	179.4	355.537
704	2	1296	104.01	175.053	154.865		175.511	179.6	355.972
705	2	1295	104.118	175.232	155.015		175.693	179.8	356.406
706	2	1294	104.207	175.442	155.175		175.907	180	356.624
707	2	1293	104.306	175.637	155.325		176.122	180.175	357.275
708	2	1292	104.451	175.847	155.495		176.336	180.375	357.655
709	2	1291	104.54	176.088	155.675		176.534	180.55	357.98
710	2	1290	104.639	176.343	155.835		176.782	180.75	358.306
711	2	1289	104.739	176.537	156.015		176.996	180.925	358.739
712	2	1288	104.856	176.748	156.165		177.194	181.125	358.956
713	2	1287	104.936	176.972	156.355		177.425	181.325	359.39
714	2	1286	105.053	177.227	156.525		177.673	181.525	359.769
715	2	1285	105.171	177.452	156.765		177.854	181.775	360.04
716	2	1284	105.243	177.692	156.925		178.085	181.975	360.419
717	2	1283	105.35	177.903	157.125		178.316	182.175	360.852
718	2	1282	105.459	178.127	157.365		178.58	182.375	361.285
719	2	1281	105.567	178.368	157.515		178.828	182.575	361.718
720	2	1280	105.647	178.683	157.715		179.158	182.825	362.15
721	2	1279	105.764	178.847	157.865		179.339	183.05	362.529
722	2	1278	105.873	179.058	158.075		179.521	183.225	362.961
723	2	1277	105.972	179.268	158.265		179.719	183.45	363.555
724	2	1276	106.07	179.477	158.415		179.933	183.65	363.771
725	2	1275	106.142	179.718	158.605		180.181	183.925	364.149
726	2	1274	106.269	179.942	158.795		180.412	184.15	364.581
727	2	1273	106.385	180.183	158.985		180.659	184.325	365.121
728	2	1272	106.493	180.363	159.175		180.874	184.625	365.445
729	2	1271	106.611	180.618	159.345		181.105	184.825	365.768
730	2	1270	106.674	180.782	159.515	159.628	181.237	185	366.146
731	2	1269	106.763	180.963	159.705	159.829	181.418	185.2	366.577
732	2	1268	106.889	181.143	159.865	159.984	181.633	185.375	366.793
733	2	1267	107.043	181.382	160.065	160.217	181.88	185.625	367.17
734	2	1266	107.159	181.562	160.255	160.403	182.062	185.85	367.493
735	2	1265	107.258	181.713	160.415	160.558	182.21	186.025	368.031
736	2	1264	107.394	181.907	160.575	160.752	182.375	186.225	368.408
737	2	1263	107.484	182.102	160.745	160.961	182.553	186.45	368.839
738	2	1262	107.609	182.298	160.955	161.178	182.784	186.725	369.162
739	2	1261	107.7	182.507	161.125	161.302	182.965	186.925	369.484
740	2	1260	107.817	182.718	161.315	161.472	183.13	187.1	369.861
741	2	1259	107.906	182.928	161.495	161.713	183.312	187.325	370.291
742	2	1258	107.996	183.123	161.685	161.875	183.493	187.6	370.667
743	2.1	1257	108.177	183.333	161.915	162.092	183.741	187.8	371.043
744	2.14142	1256	108.257	183.558	162.105	162.263	183.988	188	371.473
745	2.17321	1255	108.338	183.782	162.285	162.464	184.236	188.2	371.762
746	2.2	1254	108.456	183.993	162.475	162.619	184.434	188.475	372.117
747	2.22361	1253	108.6	184.232	162.695	162.836	184.648	188.65	372.439
748	2.24495	1252	108.689	184.382	162.875	163.007	184.83	188.875	372.707
749	2.26458	1251	108.788	184.532	163.045	163.146	185.011	189.05	373.19
750	2.28284	1250	108.888	184.787	163.215	163.363	185.242	189.35	373.673
751	2.3	1249	109.004	184.998	163.375	163.596	185.49	189.55	374.048
752	2.31623	1248	109.112	185.178	163.585	163.782	185.655	189.75	374.477
753	2.33166	1247	109.23	185.403	163.775	163.95	185.869	189.95	375.066
754	2.34641	1246	109.32	185.613	163.955	164.123	186.1	190.2	375.548
755	2.36056	1245	109.436	185.838	164.155	164.309	186.265	190.4	375.816
756	2.37417	1244	109.526	186.032	164.315	164.479	186.48	190.6	376.137
757	2.3873	1243	109.626	186.273	164.515	164.681	186.76	190.8	376.618
758	2.4	1242	109.743	186.542	164.675	164.836	186.991	191.05	376.993
759	2.41231	1241	109.859	186.768	164.865	165.022	187.173	191.275	377.421
760	2.42426	1240	109.977	187.023	165.065	165.208	187.371	191.475	377.848
761	2.43589	1239	110.103	187.278	165.275	165.425	187.546	191.675	378.329
762	2.44721	1238	110.201	187.488	165.435	165.611	187.684	191.875	378.703
763	2.45826	1237	110.319	187.653	165.635	165.781	187.932	192.15	379.184
764	2.46904	1236	110.427	187.847	165.785	165.983	188.08	192.35	379.558
765	2.47958	1235	110.525	188.072	165.975	166.169	188.295	192.575	379.985
766	2.4899	1234	110.669	188.298	166.135	166.37	188.526	192.775	380.251
767	2.5	1233	110.75	188.523	166.295	166.525	188.773	192.975	380.625
768	2.5099	1232	110.83	188.718	166.475	166.649	188.991	193.225	380.945
769	2.51962	1231	110.95	188.942	166.635	166.82	189.153	193.4	381.371
770	2.52915	1230	111.05	189.093	166.805	166.975	189.45	193.625	381.851
771	2.53852	1229	111.129	189.287	166.965	167.13	189.681	193.8	382.171
772	2.54772	1228	111.237	189.512	167.205	167.347	189.97	194.025	382.544
773	2.55678	1227	111.3	189.708	167.355	167.502	190.209	194.2	383.023
774	2.56569	1226	111.398	189.887	167.535	167.688	190.456	194.4	383.342
775	2.57446	1225	111.516	190.067	167.715	167.827	190.654	194.675	383.768
776	2.5831	1224	111.641	190.292	167.895	168.06	190.836	194.875	384.141
777	2.59161	1223	111.767	190.577	168.165	168.323	191.017	195.1	384.566
778	2.6	1222	111.912	190.787	168.365	168.571	191.265	195.275	384.885
779	2.60828	1221	112.019	190.998	168.585	168.742	191.496	195.45	385.31
780	2.61644	1220	112.136	191.238	168.805	168.959	191.743	195.65	385.629
781	2.6245	1219	112.263	191.477	168.995	169.114	191.991	195.85	386.426
782	2.63246	1218	112.371	191.732	169.185	169.331	192.205	196.075	386.851
783	2.64031	1217	112.469	192.018	169.345	169.486	192.42	196.325	387.276
784	2.64807	1216	112.569	192.213	169.525	169.656	192.634	196.525	387.806
785	2.65574	1215	112.668	192.393	169.705	169.873	192.832	196.725	388.231
786	2.66332	1214	112.802	192.618	169.885	170.044	193.03	196.95	388.549
787	2.67082	1213	112.919	192.827	170.095	170.245	193.261	197.25	388.92
788	2.67823	1212	113.046	193.053	170.295	170.478	193.492	197.45	389.397
789	2.68557	1211	113.189	193.232	170.505	170.679	193.641	197.75	389.768
790	2.69282	1210	113.27	193.442	170.695	170.85	193.888	197.95	390.192
791	2.7	1209	113.361	193.653	170.865	170.974	194.119	198.125	390.774
792	2.70711	1208	113.504	193.877	171.075	171.222	194.334	198.35	391.197
793	2.71414	1207	113.59	194.173	171.225	171.392	194.598	198.6	391.515
794	2.72111	1206	113.775	194.442	171.495	171.64	195	198.975	391.832
795	2.72801	1205	113.891	194.607	171.645	171.78	195.1	199.175	392.308
796	2.73485	1204	113.981	194.847	171.785	171.981	195.258	199.35	392.784
797	2.74162	1203	114.081	195.072	171.945	172.136	195.439	199.525	393.101
798	2.74833	1202	114.162	195.208	172.125	172.291	195.621	199.725	393.471
799	2.75498	1201	114.269	195.403	172.275	172.462	195.835	199.925	393.788
800	2.76158	1200	114.359	195.627	172.465	172.632	196.066	200.125	394.158
801	2.76811	1199	114.495	195.822	172.665	172.818	196.248	200.325	394.422
802	2.7746	1198	114.594	196.048	172.825	172.973	196.479	200.5	394.686
803	2.78102	1197	114.719	196.213	173.015	173.144	196.66	200.7	395.16
804	2.7874	1196	114.837	196.407	173.215	173.345	196.842	200.875	395.688
805	2.79373	1195	114.963	196.572	173.375	173.516	197.007	201.2	395.952
806	2.8	1194	115.088	196.782	173.585	173.717	197.221	201.375	396.268
807	2.80623	1193	115.188	196.977	173.785	173.903	197.436	201.575	396.637
808	2.8124	1192	115.26	197.188	173.915	174.105	197.617	201.75	397.059
809	2.81854	1191	115.403	197.412	174.105	174.26	197.815	201.9	397.269
810	2.82462	1190	115.502	197.653	174.335	174.492	198.079	202.225	397.796
811	2.83066	1189	115.602	197.863	174.495	174.663	198.277	202.425	398.217
812	2.83666	1188	115.71	198.118	174.645	174.88	198.541	202.6	398.586
813	2.84261	1187	115.862	198.312	174.875	175.066	198.723	202.775	398.849
814	2.84853	1186	115.953	198.523	175.035	175.221	198.987	202.975	399.217
815	2.8544	1185	116.05	198.657	175.205	175.36	199.1	203.15	399.48
816	2.86023	1184	116.132	198.898	175.365	175.577	199.317	203.475	399.901
817	2.86603	1183	116.25	199.062	175.555	175.732	199.498	203.65	400.268
818	2.87178	1182	116.358	199.243	175.725	175.872	199.68	203.85	400.479
819	2.8775	1181	116.45	199.468	175.875	176.073	199.813	204.025	400.741
820	2.88318	1180	116.546	199.632	176.055	176.244	199.977	204.225	401.214
821	2.88882	1179	116.663	199.812	176.245	176.383	200.175	204.45	401.687
822	2.89443	1178	116.808	200.067	176.515	176.585	200.505	204.675	401.99
823	2.9	1177	116.978	200.262	176.665	176.802	200.719	205	402.264
824	2.90554	1176	117.078	200.488	176.845	177.003	200.884	205.225	402.789
825	2.91104	1175	117.222	200.667	177.115	177.236	201.115	205.4	403.313
826	2.91652	1174	117.302	200.847	177.265	177.391	201.346	205.625	403.628
827	2.92195	1173	117.438	201.058	177.425	177.577	201.528	205.825	404.047
828	2.92736	1172	117.573	201.235	177.605	177.757	201.693	206.025	404.414
829	2.93274	1171	117.671	201.343	177.775	177.883	201.85	206.225	404.833
830	2.93808	1170	117.761	201.507	177.915	178.011	201.95	206.425	405.409
831	2.9434	1169	117.861	201.702	178.075	178.197	202.122	206.625	405.985
832	2.94868	1168	117.96	202.002	178.215	178.367	202.336	206.85	406.456
833	2.95394	1167	118.085	202.183	178.415	178.553	202.534	207.125	406.77
834	2.95917	1166	118.212	202.393	178.675	178.786	202.782	207.325	407.136
835	2.96437	1165	118.32	202.602	178.875	178.972	203.029	207.5	407.397
836	2.96954	1164	118.427	202.812	179.035	179.158	203.26	207.825	407.659
837	2.97468	1163	118.572	203.037	179.235	179.344	203.541	208.025	408.024
838	2.9798	1162	118.671	203.218	179.375	179.53	203.722	208.225	408.286
839	2.98489	1161	118.796	203.382	179.585	179.716	203.904	208.425	408.808
840	2.98995	1160	118.904	203.607	179.832	179.902	204.069	208.675	409.226
841	2.99499	1159	119.013	203.787	179.968	180.072	204.267	208.875	409.8
842	3	1158	119.156	204.001	180.115	180.243	204.481	209.075	410.165
843	3.00499	1157	119.246	204.121	180.235	180.398	204.63	209.275	410.478
844	3.00995	1156	119.363	204.298	180.405	180.584	204.811	209.475	410.843
845	3.01489	1155	119.516	204.567	180.605	180.77	205.026	209.675	411.26
846	3.0198	1154	119.615	204.778	180.755	180.925	205.207	209.875	411.625
847	3.0247	1153	119.715	205.032	180.965	181.126	205.422	210.15	411.99
848	3.02956	1152	119.814	205.183	181.095	181.25	205.587	210.375	412.458
849	3.03441	1151	119.912	205.377	181.275	181.436	205.801	210.575	412.875
850	3.03923	1150	120.011	205.512	181.485	181.576	205.966	210.75	413.343
851	3.04403	1149	120.12	205.738	181.625	181.777	206.197	210.975	413.864
852	3.04881	1148	120.254	205.917	181.805	181.932	206.379	211.3	414.124
853	3.05357	1147	120.371	206.127	182.065	182.118	206.593	211.5	414.488
854	3.0583	1146	120.489	206.442	182.325	182.366	206.89	211.725	414.955
855	3.06301	1145	120.579	206.667	182.485	182.583	207.154	211.925	415.267
856	3.06771	1144	120.713	206.893	182.635	182.8	207.352	212.15	415.631
857	3.07238	1143	120.817	207.088	182.785	183.002	207.567	212.325	415.995
858	3.07703	1142	120.9	207.343	182.975	183.141	207.765	212.525	416.41
859	3.08167	1141	120.984	207.537	183.165	183.304	207.979	212.7	416.721
860	3.08628	1140	121.073	207.748	183.315	183.45	208.194	212.9	417.033
861	3.09087	1139	121.245	208.032	183.525	183.653	208.458	213.175	417.344
862	3.09545	1138	121.388	208.197	183.755	183.87	208.656	213.425	417.707
863	3.1	1137	121.487	208.377	183.935	184.04	208.821	213.65	418.07
864	3.10454	1136	121.614	208.602	184.145	184.335	209.068	213.85	418.537
865	3.10905	1135	121.766	208.812	184.345	184.505	209.266	214.075	418.744
866	3.11355	1134	121.874	209.037	184.535	184.676	209.464	214.325	419.159
867	3.11803	1133	121.965	209.218	184.735	184.877	209.662	214.55	419.625
868	3.1225	1132	122.073	209.354	184.895	185.017	209.844	214.7	419.987
869	3.12694	1131	122.18	209.559	185.065	185.203	210.025	214.925	420.402
870	3.13137	1130	122.325	209.743	185.245	185.42	210.207	215.2	420.764
871	3.13578	1129	122.406	209.982	185.425	185.59	210.438	215.375	421.333
872	3.14018	1128	122.513	210.268	185.645	185.792	210.685	215.575	421.643
873	3.14455	1127	122.621	210.507	185.875	185.978	210.949	215.8	422.005
874	3.14891	1126	122.73	210.718	186.065	186.148	211.114	216.1	422.47
875	3.15326	1125	122.865	210.942	186.285	186.365	211.411	216.3	422.677
876	3.15758	1124	122.981	211.183	186.465	186.582	211.626	216.5	423.09
877	3.1619	1123	123.081	211.438	186.665	186.799	211.89	216.7	423.4
878	3.16619	1122	123.189	211.602	186.875	186.97	212.045	216.9	423.916
879	3.17047	1121	123.278	211.782	187.075	187.156	212.137	217.125	424.226
880	3.17473	1120	123.395	211.977	187.265	187.357	212.368	217.375	424.691
881	3.17898	1119	123.495	212.143	187.455	187.543	212.566	217.6	425.103
882	3.18322	1118	123.612	212.308	187.625	187.683	212.731	217.8	425.567
883	3.18743	1117	123.701	212.532	187.775	187.853	212.961	218	425.928
884	3.19164	1116	123.828	212.803	187.945	188.055	213.181	218.25	426.237
885	3.19583	1115	123.909	213.042	188.125	188.241	213.378	218.475	426.443
886	3.2	1114	124.007	213.222	188.315	188.396	213.54	218.675	426.752
887	3.20416	1113	124.097	213.417	188.465	188.582	213.843	218.875	427.216
888	3.2083	1112	124.206	213.643	188.655	188.752	214.018	219.05	427.576
889	3.21244	1111	124.278	213.838	188.815	188.907	214.192	219.275	427.885
890	3.21655	1110	124.368	213.98	189.015	189.093	214.375	219.533	428.348
891	3.22066	1109	124.466	214.287	189.225	189.326	214.728	219.75	428.708
892	3.22474	1108	124.575	214.498	189.425	189.512	214.926	219.975	429.12
893	3.22882	1107	124.719	214.65	189.575	189.713	215.091	220.225	429.428
894	3.23288	1106	124.808	214.8	189.775	189.899	215.338	220.425	429.993
895	3.23693	1105	124.934	214.963	189.965	190.101	215.52	220.625	430.25
896	3.24097	1104	125.061	215.127	190.125	190.287	215.718	220.825	430.815
897	3.24499	1103	125.168	215.398	190.285	190.473	215.965	221.1	431.277
898	3.249	1102	125.294	215.637	190.575	190.674	216.246	221.3	431.636
899	3.253	1101	125.403	215.877	190.735	190.845	216.444	221.5	431.996
900	3.25698	1100	125.51	216.072	190.955	191	216.675	221.7	432.406
901	3.26095	1099	125.609	216.252	191.125	191.201	216.906	221.9	432.816
902	3.26491	1098	125.691	216.493	191.285	191.372	217.087	222.125	433.226
903	3.26886	1097	125.776	216.688	191.475	191.589	217.351	222.325	433.79
904	3.27279	1096	125.885	216.972	191.657	191.775	217.665	222.5	434.046
905	3.27671	1095	126.014	217.213	191.836	191.93	217.813	222.725	434.353
906	3.28062	1094	126.132	217.347	192.02	192.131	217.995	222.925	434.814
907	3.28452	1093	126.266	217.618	192.215	192.364	218.242	223.1	435.223
908	3.28841	1092	126.383	217.843	192.415	192.534	218.457	223.3	435.479
909	3.29228	1091	126.501	218.186	192.575	192.705	218.622	223.575	435.786
910	3.29615	1090	126.635	218.428	192.795	192.906	218.803	223.8	436.144
911	3.3	1089	126.761	218.653	193.015	193.108	219.018	224.05	436.451
912	3.30384	1088	126.861	218.863	193.235	193.325	219.232	224.275	436.911
913	3.30767	1087	126.996	219.088	193.415	193.557	219.43	224.475	437.422
914	3.31149	1086	127.112	219.268	193.575	193.697	219.612	224.65	437.779
915	3.31529	1085	127.221	219.463	193.775	193.867	219.81	224.95	438.137
916	3.31909	1084	127.365	219.643	193.965	194.084	220.041	225.15	438.749
917	3.32288	1083	127.436	219.822	194.125	194.239	220.206	225.325	439.056
918	3.32665	1082	127.562	219.975	194.265	194.394	220.371	225.525	439.464
919	3.33041	1081	127.653	220.062	194.395	194.534	220.519	225.7	439.77
920	3.33417	1080	127.75	220.287	194.565	194.658	220.684	225.875	440.228
921	3.33791	1079	127.823	220.498	194.687	194.828	220.866	226.05	440.483
922	3.34164	1078	127.922	220.692	194.902	194.983	221.08	226.225	440.891
923	3.34536	1077	128.04	220.873	195.006	195.154	221.278	226.425	441.197
924	3.34907	1076	128.166	221.067	195.265	195.324	221.509	226.625	441.604
925	3.35277	1075	128.292	221.292	195.415	195.495	221.691	226.775	441.96
926	3.35647	1074	128.391	221.502	195.585	195.696	221.872	226.975	442.418
927	3.36015	1073	128.499	221.713	195.815	195.929	222.169	227.2	442.622
928	3.36382	1072	128.651	221.893	195.965	196.115	222.334	227.45	443.181
929	3.36748	1071	128.75	222.118	196.125	196.285	222.532	227.675	443.537
930	3.37113	1070	128.85	222.327	196.305	196.44	222.747	227.85	443.842
931	3.37477	1069	128.966	222.537	196.505	196.611	222.945	228.05	444.198
932	3.3784	1068	129.075	222.748	196.695	196.766	223.126	228.25	444.554
933	3.38203	1067	129.173	222.928	196.885	196.952	223.275	228.45	444.909
934	3.38564	1066	129.299	223.123	197.025	197.107	223.489	228.675	445.265
935	3.38924	1065	129.435	223.317	197.185	197.262	223.621	228.875	445.722
936	3.39284	1064	129.516	223.528	197.325	197.417	223.885	229.05	446.28
937	3.39642	1063	129.614	223.738	197.475	197.603	224.067	229.25	446.635
938	3.4	1062	129.758	223.963	197.655	197.758	224.248	229.45	446.99
939	3.40357	1061	129.885	224.1	197.825	197.944	224.446	229.7	447.345
940	3.40712	1060	130.019	224.28	197.985	198.068	224.578	229.975	447.598
941	3.41067	1059	130.19	224.45	198.175	198.3	224.842	230.225	447.953
942	3.41421	1058	130.316	224.577	198.365	198.471	225.007	230.45	448.358
943	3.41774	1057	130.434	224.803	198.535	198.61	225.205	230.675	448.814
944	3.42127	1056	130.524	224.998	198.715	198.796	225.42	230.9	449.32
945	3.42478	1055	130.659	225.222	198.895	198.951	225.601	231.125	449.776
946	3.42829	1054	130.785	225.433	199.085	199.153	225.832	231.325	450.13
947	3.43178	1053	130.893	225.643	199.265	199.308	226.063	231.5	450.383
948	3.43527	1052	130.992	225.852	199.415	199.509	226.311	231.725	450.888
949	3.43875	1051	131.118	226.062	199.595	199.695	226.476	231.95	451.394
950	3.44222	1050	131.27	226.287	199.886	199.866	226.657	232.2	451.899
951	3.44568	1049	131.387	226.512	200.016	200.067	226.855	232.4	452.151
952	3.44914	1048	131.541	226.708	200.164	200.315	227.053	232.625	452.606
953	3.45258	1047	131.667	226.873	200.335	200.532	227.251	232.975	453.009
954	3.45602	1046	131.756	227.053	200.585	200.672	227.4	233.15	453.464
955	3.45945	1045	131.9	227.262	200.785	200.811	227.581	233.375	453.817
956	3.46287	1044	132.018	227.472	200.925	201.013	227.812	233.6	454.17
957	3.46629	1043	132.135	227.697	201.125	201.23	228.06	233.85	454.623
958	3.46969	1042	132.243	227.907	201.305	201.385	228.258	234.1	455.127
959	3.47309	1041	132.333	228.132	201.475	201.602	228.489	234.25	455.53
960	3.47648	1040	132.468	228.343	201.685	201.803	228.67	234.55	455.983
961	3.47986	1039	132.62	228.553	201.865	201.958	228.868	234.75	456.285
962	3.48324	1038	132.728	228.748	202.035	202.16	229.067	234.975	456.587
963	3.48661	1037	132.873	228.972	202.235	202.361	229.275	235.175	456.99
964	3.48997	1036	132.971	229.303	202.385	202.516	229.443	235.375	457.543
965	3.49332	1035	133.053	229.512	202.575	202.671	229.644	235.575	458.096
966	3.49666	1034	133.145	229.692	202.735	202.857	229.842	235.775	458.498
967	3.5	1033	133.286	229.857	202.925	203.028	230.007	235.95	458.8
968	3.50333	1032	133.448	230.057	203.065	203.214	230.188	236.15	459.252
969	3.50665	1031	133.52	230.232	203.215	203.384	230.37	236.35	459.653
970	3.50997	1030	133.655	230.4	203.41	203.555	230.518	236.55	460.055
971	3.51327	1029	133.773	230.55	203.565	203.694	230.716	236.75	460.456
972	3.51658	1028	133.863	230.697	203.705	203.849	230.848	236.95	460.757
973	3.51987	1027	134.034	230.893	203.905	204.004	231.046	237.2	461.159
974	3.52315	1026	134.15	231.088	204.025	204.159	231.211	237.425	461.459
975	3.52643	1025	134.294	231.312	204.245	204.361	231.442	237.7	461.76
976	3.52971	1024	134.421	231.424	204.435	204.562	231.657	237.9	462.061
977	3.53297	1023	134.555	231.594	204.615	204.733	231.855	238.1	462.612
978	3.53623	1022	134.655	231.718	204.815	204.919	232.069	238.325	462.962
979	3.53948	1021	134.772	231.898	204.985	205.074	232.251	238.525	463.413
980	3.54272	1020	134.88	232.048	205.135	205.229	232.383	238.75	463.713
981	3.54596	1019	134.996	232.197	205.255	205.399	232.531	238.95	464.113
982	3.54919	1018	135.113	232.377	205.425	205.57	232.696	239.15	464.363
983	3.55242	1017	135.221	232.602	205.635	205.756	232.894	239.375	464.714
984	3.55563	1016	135.329	232.768	205.835	205.957	233.059	239.6	465.113
985	3.55885	1015	135.429	232.947	205.995	206.143	233.323	239.825	465.663
986	3.56205	1014	135.536	233.157	206.175	206.298	233.521	239.975	465.913
987	3.56525	1013	135.654	233.352	206.365	206.453	233.719	240.175	466.362
988	3.56844	1012	135.77	233.562	206.565	206.67	233.917	240.375	466.712
989	3.57162	1011	135.923	233.773	206.725	206.856	234.099	240.55	467.111
990	3.5748	1010	136.005	233.952	206.915	207.027	234.28	240.725	467.56
991	3.57797	1009	136.121	234.148	207.115	207.213	234.511	240.925	467.86
992	3.58114	1008	136.22	234.387	207.305	207.507	234.742	241.125	468.308
993	3.5843	1007	136.302	234.597	207.485	207.662	234.94	241.425	468.608
994	3.58745	1006	136.41	234.822	207.675	207.817	235.171	241.6	468.807
995	3.5906	1005	136.526	235.002	207.865	207.957	235.336	241.825	469.255
996	3.59374	1004	136.653	235.227	208.045	208.158	235.534	242	469.604
997	3.59687	1003	136.779	235.452	208.215	208.298	235.782	242.2	469.953
998	3.6	1002	136.869	235.662	208.375	208.499	235.98	242.425	470.301
999	3.60312	1001	136.994	235.903	208.565	208.685	236.211	242.625	470.799
1000	3.60624	1000	137.112	236.067	208.735	208.856	236.376	242.825	471.097
1001	3.60935	999	137.174	236.292	208.905	209.05	236.557	243.006	471.495
1002	3.61245	998	137.319	236.488	209.085	209.2	236.772	243.15	471.893
1003	3.61555	997	137.409	236.727	209.255	209.412	237.003	243.375	472.44
1004	3.61864	996	137.543	236.893	209.445	209.562	237.184	243.575	472.788
1005	3.62173	995	137.696	237.132	209.655	209.803	237.415	243.825	473.036
1006	3.62481	994	137.768	237.373	209.825	209.968	237.679	244.025	473.483
1007	3.62788	993	137.868	237.597	210.005	210.12	237.927	244.225	473.93
1008	3.63095	992	137.976	237.792	210.195	210.312	238.125	244.425	474.426
1009	3.63401	991	138.111	238.002	210.385	210.507	238.372	244.625	474.724
1010	3.63707	990	138.245	238.197	210.605	210.702	238.537	244.825	475.12
1011	3.64012	989	138.363	238.347	210.775	210.882	238.735	245.125	475.616
1012	3.64317	988	138.48	238.558	210.965	211.048	238.933	245.35	475.963
1013	3.64621	987	138.632	238.738	211.125	211.26	239.082	245.525	476.508
1014	3.64924	986	138.75	238.963	211.315	211.41	239.28	245.7	476.954
1015	3.65227	985	138.885	239.157	211.485	211.602	239.527	245.95	477.3
1016	3.65529	984	139.047	239.352	211.655	211.798	239.709	246.15	477.746
1017	3.65831	983	139.173	239.577	211.885	212.037	239.94	246.475	478.141
1018	3.66132	982	139.308	239.817	212.075	212.188	240.204	246.7	478.438
1019	3.66433	981	139.406	239.998	212.255	212.352	240.369	246.975	478.883
1020	3.66733	980	139.514	240.192	212.415	212.518	240.534	247.175	479.13
1021	3.67033	979	139.595	240.387	212.6	212.667	240.732	247.35	479.476
1022	3.67332	978	139.7	240.583	212.775	212.863	240.93	247.55	479.921
1023	3.67631	977	139.819	240.778	212.945	213.058	241.128	247.8	480.267
1024	3.67929	976	139.915	240.972	213.145	213.222	241.309	248	480.76
1025	3.68226	975	140.027	241.183	213.325	213.433	241.491	248.2	481.205
1026	3.68523	974	140.136	241.377	213.495	213.613	241.738	248.475	481.649
1027	3.68819	973	140.25	241.588	213.675	213.808	241.903	248.75	481.895
1028	3.69115	972	140.32	241.827	213.875	213.988	242.101	248.95	482.438
1029	3.69411	971	140.405	242.035	214.085	214.167	242.349	249.125	482.684
1030	3.69706	970	140.509	242.278	214.275	214.333	242.547	249.35	483.029
1031	3.7	969	140.649	242.472	214.465	214.542	242.778	249.6	483.571
1032	3.70294	968	140.792	242.637	214.635	214.738	242.992	249.8	483.916
1033	3.70587	967	140.928	242.877	214.815	214.933	243.223	250.025	484.211
1034	3.7088	966	141.044	243.148	214.985	215.067	243.438	250.25	484.506
1035	3.71172	965	141.143	243.312	215.155	215.292	243.586	250.65	484.998
1036	3.71464	964	141.269	243.493	215.325	215.472	243.751	250.825	485.294
1037	3.71756	963	141.382	243.702	215.475	215.653	243.966	251.025	485.638
1038	3.72047	962	141.486	243.942	215.665	215.787	244.213	251.325	486.031
1039	3.72337	961	141.584	244.167	215.895	215.968	244.428	251.525	486.375
1040	3.72627	960	141.692	244.363	216.115	216.208	244.626	251.725	486.67
1041	3.72916	959	141.792	244.602	216.265	216.343	244.84	251.9	487.063
1042	3.73205	958	141.963	244.752	216.425	216.523	245.022	252.125	487.456
1043	3.73494	957	142.089	244.933	216.615	216.718	245.236	252.425	487.848
1044	3.73781	956	142.224	245.143	216.825	216.898	245.434	252.625	488.241
1045	3.74069	955	142.304	245.412	217.025	217.062	245.698	252.925	488.584
1046	3.74356	954	142.412	245.607	217.165	217.273	245.88	253.125	489.026
1047	3.74642	953	142.601	245.803	217.345	217.468	246.078	253.4	489.418
1048	3.74929	952	142.683	245.982	217.525	217.678	246.259	253.625	489.761
1049	3.75214	951	142.78	246.178	217.735	217.843	246.424	253.85	490.104
1050	3.75499	950	142.845	246.373	217.925	218.067	246.639	254.1	490.545
1051	3.75784	949	142.944	246.537	218.075	218.173	246.804	254.3	490.79
1052	3.76068	948	143.07	246.748	218.275	218.398	247.002	254.475	491.133
1053	3.76352	947	143.186	246.942	218.465	218.562	247.2	254.7	491.377
1054	3.76635	946	143.294	247.107	218.625	218.713	247.365	254.875	491.769
1055	3.76918	945	143.385	247.333	218.795	218.877	247.563	255.1	492.062
1056	3.772	944	143.519	247.498	219.005	219.072	247.744	255.375	492.502
1057	3.77482	943	143.619	247.692	219.185	219.252	247.959	255.6	492.796
1058	3.77764	942	143.744	247.827	219.315	219.387	248.206	255.775	493.382
1059	3.78045	941	143.826	247.993	219.465	219.523	248.404	255.975	493.773
1060	3.78326	940	143.942	248.248	219.685	219.748	248.619	256.15	494.213
1061	3.78606	939	144.069	248.502	219.905	219.988	248.866	256.425	494.506
1062	3.78885	938	144.159	248.727	220.105	220.197	249.13	256.625	494.896
1063	3.79165	937	144.239	248.907	220.265	220.333	249.312	256.8	495.335
1064	3.79444	936	144.357	249.118	220.405	220.542	249.576	257	495.725
1065	3.79722	935	144.51	249.282	220.575	220.648	249.652	257.225	496.115
1066	3.8	934	144.672	249.477	220.795	220.887	249.906	257.425	496.359
1067	3.80278	933	144.788	249.732	220.975	221.053	250.087	257.6	496.798
1068	3.80555	932	144.897	249.912	221.145	221.232	250.285	257.8	497.188
1069	3.80831	931	144.995	250.123	221.285	221.398	250.5	258	497.577
1070	3.81108	930	145.139	250.287	221.445	221.607	250.681	258.3	497.821
1071	3.81384	929	145.248	250.452	221.635	221.743	250.863	258.5	498.113
1072	3.81659	928	145.392	250.632	221.825	221.923	251.028	258.7	498.551
1073	3.81934	927	145.536	250.857	222.005	222.118	251.226	258.9	498.94
1074	3.82209	926	145.635	251.037	222.165	222.268	251.424	259.1	499.28
1075	3.82483	925	145.769	251.232	222.385	222.493	251.605	259.35	499.669
1076	3.82757	924	145.859	251.398	222.535	222.657	251.77	259.575	500.01
1077	3.8303	923	146.004	251.623	222.725	222.852	252.018	259.775	500.35
1078	3.83303	922	146.12	251.787	222.885	223.018	252.2	259.975	500.69
1079	3.83576	921	146.246	251.998	223.035	223.183	252.4	260.175	501.03
1080	3.83848	920	146.373	252.192	223.195	223.377	252.562	260.4	501.321
1081	3.8412	919	146.499	252.387	223.435	223.572	252.76	260.625	501.758
1082	3.84391	918	146.589	252.597	223.575	223.738	252.975	260.825	502.049
1083	3.84662	917	146.679	252.808	223.765	223.887	253.189	261.05	502.356
1084	3.84932	916	146.814	253.032	223.985	224.127	253.437	261.3	502.631
1085	3.85203	915	146.912	253.213	224.215	224.308	253.602	261.475	503.019
1086	3.85472	914	147.02	253.452	224.375	224.472	253.8	261.7	503.455
1087	3.85742	913	147.165	253.648	224.565	224.683	254.064	261.9	503.794
1088	3.86011	912	147.309	253.827	224.775	224.877	254.245	262.075	504.037
1089	3.86279	911	147.425	254.007	224.915	225.012	254.427	262.3	504.376
1090	3.86548	910	147.524	254.202	225.095	225.208	254.608	262.475	504.763
1091	3.86815	909	147.596	254.382	225.275	225.403	254.773	262.7	505.199
1092	3.87083	908	147.664	254.607	225.475	225.523	254.988	262.875	505.586
1093	3.8735	907	147.768	254.817	225.595	225.688	255.169	263.1	505.876
1094	3.87617	906	147.875	255.028	225.755	225.868	255.384	263.3	506.263
1095	3.87883	905	148.011	255.222	226.005	226.123	255.615	263.525	506.649
1096	3.88149	904	148.083	255.433	226.145	226.317	255.796	263.7	507.036
1097	3.88414	903	148.17	255.597	226.275	226.452	255.994	263.9	507.423
1098	3.8868	902	148.334	255.852	226.525	226.618	256.209	264.1	507.857
1099	3.88944	901	148.465	256.048	226.695	226.782	256.489	264.375	508.099
1100	3.89209	900	148.55	256.243	226.845	226.947	256.687	264.575	508.485
1101	3.89473	899	148.667	256.452	227.035	227.143	256.902	264.8	509.112
1102	3.89737	898	148.739	256.678	227.235	227.322	257.083	265.025	509.401
1103	3.9	897	148.893	256.933	227.435	227.532	257.314	265.225	509.691
1104	3.90263	896	148.974	257.173	227.635	227.713	257.611	265.4	509.98
1105	3.90526	895	149.108	257.368	227.825	227.907	257.793	265.7	510.269
1106	3.90788	894	149.198	257.517	227.975	228.102	257.974	265.9	510.703
1107	3.9105	893	149.298	257.772	228.175	228.282	258.189	266.075	511.04
1108	3.91311	892	149.451	257.998	228.345	228.463	258.42	266.25	511.473
1109	3.91572	891	149.549	258.178	228.505	228.643	258.618	266.575	511.81
1110	3.91833	890	149.657	258.387	228.705	228.822	258.799	266.775	512.147
1111	3.92094	889	149.82	258.567	228.875	228.972	258.964	266.95	512.532
1112	3.92354	888	149.91	258.777	229.015	229.183	259.162	267.125	512.965
1113	3.92614	887	150.026	258.928	229.185	229.35	259.327	267.325	513.253
1114	3.92873	886	150.117	259.092	229.355	229.45	259.492	267.5	513.686
1115	3.93132	885	150.207	259.243	229.545	229.588	259.657	267.7	514.022
1116	3.93391	884	150.323	259.423	229.685	229.782	259.855	267.95	514.311
1117	3.93649	883	150.468	259.647	229.885	229.993	260.07	268.2	514.743
1118	3.93907	882	150.576	259.842	230.075	230.157	260.218	268.425	515.079
1119	3.94165	881	150.702	260.067	230.295	230.368	260.433	268.625	515.367
1120	3.94422	880	150.8	260.248	230.465	230.532	260.614	268.825	515.847
1121	3.94679	879	150.899	260.473	230.635	230.727	260.862	269.025	516.326
1122	3.94936	878	151.053	260.728	230.825	230.923	261.093	269.225	516.71
1123	3.95192	877	151.125	260.923	230.985	231.058	261.34	269.45	517.141
1124	3.95448	876	151.278	261.132	231.135	231.238	261.538	269.65	517.476
1125	3.95704	875	151.376	261.327	231.335	231.433	261.753	269.825	517.907
1126	3.95959	874	151.476	261.553	231.475	231.613	261.951	270.025	518.243
1127	3.96214	873	151.637	261.733	231.725	231.808	262.132	270.275	518.673
1128	3.96469	872	151.809	262.033	231.885	231.988	262.413	270.5	519.008
1129	3.96723	871	151.935	262.228	232.075	232.197	262.644	270.7	519.391
1130	3.96977	870	152.034	262.452	232.275	232.363	262.842	270.9	519.726
1131	3.97231	869	152.168	262.632	232.475	232.528	263.056	271.1	519.965
1132	3.97484	868	152.286	262.798	232.615	232.678	263.221	271.325	520.299
1133	3.97737	867	152.385	263.022	232.775	232.843	263.436	271.525	520.682
1134	3.9799	866	152.537	263.202	232.95	233.023	263.584	271.725	520.921
1135	3.98242	865	152.655	263.473	233.125	233.202	263.881	271.925	521.207
1136	3.98494	864	152.79	263.668	233.285	233.368	264.063	272.175	521.541
1137	3.98746	863	152.906	263.817	233.475	233.548	264.244	272.35	521.971
1138	3.98997	862	153.006	264.004	233.615	233.713	264.442	272.575	522.257
1139	3.99249	861	153.113	264.172	233.785	233.923	264.69	272.85	522.782
1140	3.99499	860	153.213	264.327	233.98	234.088	264.871	273.05	523.116
1141	3.9975	859	153.303	264.562	234.1	234.282	265.053	273.225	523.402
1142	4	858	153.411	264.74	234.275	234.403	265.218	273.4	523.688
1143	4.0025	857	153.492	264.942	234.465	234.553	265.35	273.55	524.022
1144	4.00499	856	153.59	265.108	234.635	234.702	265.515	273.7	524.403
1145	4.00749	855	153.698	265.317	234.825	234.868	265.696	273.875	524.736
1146	4.00998	854	153.798	265.483	234.975	235.048	265.878	274.075	524.974
1147	4.01246	853	153.915	265.692	235.115	235.213	266.076	274.25	525.307
1148	4.01494	852	154.005	265.887	235.265	235.393	266.29	274.425	525.736
1149	4.01742	851	154.103	266.053	235.455	235.572	266.472	274.65	525.973
1150	4.0199	850	154.248	266.233	235.625	235.738	266.62	274.875	526.449
1151	4.02237	849	154.382	266.382	235.785	235.903	266.752	275.1	526.829
1152	4.02485	848	154.454	266.548	235.965	236.113	266.95	275.275	527.162
1153	4.02731	847	154.562	266.743	236.155	236.291	267.132	275.5	527.59
1154	4.02978	846	154.689	266.923	236.365	236.488	267.346	275.725	528.112
1155	4.03224	845	154.797	267.118	236.525	236.62	267.511	276	528.587
1156	4.0347	844	154.95	267.283	236.715	236.817	267.676	276.25	528.966
1157	4.03715	843	155.066	267.45	236.875	237.012	267.924	276.475	529.346
1158	4.03961	842	155.166	267.65	237.065	237.148	268.1	276.675	529.725
1159	4.04206	841	155.292	267.795	237.235	237.298	268.237	276.875	530.057
1160	4.0445	840	155.381	268.012	237.415	237.507	268.419	277.1	530.247
1161	4.04695	839	155.471	268.207	237.565	237.657	268.584	277.275	530.579
1162	4.04939	838	155.571	268.373	237.755	237.808	268.765	277.5	531.147
1163	4.05183	837	155.706	268.613	237.965	238.062	268.98	277.7	531.479
1164	4.05426	836	155.84	268.837	238.165	238.257	269.26	277.9	531.905
1165	4.0567	835	155.976	269.033	238.325	238.438	269.442	278.125	532.189
1166	4.05913	834	156.093	269.183	238.515	238.618	269.64	278.4	532.52
1167	4.06155	833	156.183	269.392	238.715	238.782	269.821	278.6	532.898
1168	4.06398	832	156.353	269.647	238.915	238.977	270.052	278.8	533.371
1169	4.0664	831	156.435	269.827	239.055	239.157	270.267	279.025	533.702
1170	4.06882	830	156.552	269.978	239.225	239.308	270.399	279.25	533.985
1171	4.07123	829	156.642	270.158	239.375	239.458	270.564	279.4	534.334
1172	4.07364	828	156.768	270.337	239.525	239.653	270.696	279.6	534.505
1173	4.07605	827	156.885	270.548	239.7	239.847	270.894	279.875	534.788
1174	4.07846	826	156.993	270.743	239.915	240.028	271.092	280.1	535.166
1175	4.08087	825	157.109	270.983	240.105	240.192	271.356	280.3	535.638
1176	4.08327	824	157.226	271.192	240.305	240.417	271.554	280.55	536.015
1177	4.08567	823	157.352	271.447	240.515	240.627	271.818	280.75	536.346
1178	4.08806	822	157.46	271.658	240.725	240.852	272.049	280.95	536.676
1179	4.09045	821	157.605	271.913	240.925	241.032	272.263	281.15	537.053
1180	4.09284	820	157.731	272.077	241.115	241.197	272.412	281.325	537.382
1181	4.09523	819	157.865	272.243	241.265	241.393	272.593	281.6	537.806
1182	4.09762	818	157.982	272.363	241.425	241.528	272.758	281.8	538.042
1183	4.1	817	158.118	272.543	241.585	241.692	272.94	281.975	538.371
1184	4.10238	816	158.252	272.723	241.725	241.843	273.105	282.175	538.654
1185	4.10476	815	158.369	272.902	241.885	241.993	273.303	282.45	539.03
1186	4.10713	814	158.477	273.053	242.085	242.157	273.451	282.625	539.313
1187	4.1095	813	158.567	273.233	242.225	242.322	273.616	282.8	539.548
1188	4.11187	812	158.657	273.397	242.425	242.502	273.798	283	539.783
1189	4.11424	811	158.802	273.577	242.565	242.637	273.963	283.175	540.065
1190	4.1166	810	158.936	273.772	242.715	242.803	274.144	283.375	540.488
1191	4.11896	809	159.054	273.923	242.875	242.998	274.309	283.575	540.723
1192	4.12132	808	159.189	274.103	243.045	243.118	274.474	283.775	541.052
1193	4.12368	807	159.265	274.283	243.195	243.312	274.672	283.95	541.427
1194	4.12603	806	159.351	274.418	243.355	243.447	274.87	284.125	541.709
1195	4.12838	805	159.468	274.627	243.505	243.613	275.1	284.325	541.991
1196	4.13073	804	159.576	274.808	243.715	243.792	275.25	284.5	542.225
1197	4.13307	803	159.702	275.002	243.915	243.988	275.441	284.675	542.601
1198	4.13542	802	159.845	275.243	244.115	244.183	275.629	284.95	542.835
1199	4.13776	801	159.963	275.483	244.325	244.423	275.844	285.15	543.163
1200	4.14009	800	160.097	275.663	244.475	244.558	276.042	285.325	543.445
1201	4.14243	799	160.206	275.902	244.615	244.678	276.256	285.5	543.82
1202	4.14476	798	160.314	276.082	244.775	244.843	276.438	285.675	544.054
1203	4.14709	797	160.404	276.293	244.935	245.007	276.652	285.875	544.382
1204	4.14942	796	160.502	276.502	245.135	245.173	276.85	286.1	544.616
1205	4.15174	795	160.619	276.668	245.325	245.398	277.048	286.325	544.923
1206	4.15407	794	160.727	276.848	245.495	245.562	277.246	286.5	545.271
1207	4.15639	793	160.809	277.043	245.665	245.727	277.444	286.675	545.693
1208	4.1587	792	160.944	277.238	245.815	245.923	277.626	286.9	546.067
1209	4.16102	791	161.052	277.447	246.015	246.118	277.791	287.125	546.394
1210	4.16333	790	161.196	277.673	246.225	246.343	278.005	287.325	546.862
1211	4.16564	789	161.312	277.868	246.435	246.523	278.203	287.575	547.235
1212	4.16795	788	161.403	278.077	246.625	246.702	278.418	287.8	547.609
1213	4.17025	787	161.511	278.288	246.825	246.882	278.632	288	547.983
1214	4.17256	786	161.645	278.452	246.975	247.018	278.814	288.2	548.263
1215	4.17486	785	161.762	278.632	247.135	247.213	279.012	288.4	548.543
1216	4.17715	784	161.898	278.842	247.305	247.377	279.193	288.575	548.776
1217	4.17945	783	162.042	279.067	247.505	247.632	279.424	288.75	549.243
1218	4.18174	782	162.141	279.293	247.735	247.812	279.622	289.05	549.662
1219	4.18403	781	162.257	279.517	247.957	248.037	279.886	289.25	549.989
1220	4.18632	780	162.375	279.757	248.115	248.232	280.134	289.45	550.315
1221	4.18861	779	162.51	279.983	248.315	248.428	280.348	289.75	550.828
1222	4.19089	778	162.644	280.223	248.535	248.653	280.629	289.925	551.2
1223	4.19317	777	162.77	280.402	248.725	248.817	280.81	290.125	551.573
1224	4.19545	776	162.869	280.598	248.885	249.012	280.992	290.325	551.852
1225	4.19773	775	163.041	280.808	249.085	249.208	281.173	290.6	552.271
1226	4.2	774	163.157	280.988	249.265	249.387	281.338	290.8	552.689
1227	4.20227	773	163.274	281.168	249.475	249.567	281.536	291.025	553.108
1228	4.20454	772	163.4	281.377	249.635	249.718	281.767	291.225	553.526
1229	4.20681	771	163.5	281.543	249.775	249.868	281.932	291.425	554.084
1230	4.20907	770	163.589	281.738	249.935	250.032	282.114	291.625	554.455
1231	4.21133	769	163.679	281.947	250.105	250.197	282.361	291.8	554.966
1232	4.21359	768	163.815	282.1	250.265	250.35	282.52	292.025	555.337
1233	4.21585	767	163.923	282.225	250.425	250.468	282.65	292.2	555.662
1234	4.21811	766	164.03	282.413	250.565	250.632	282.823	292.4	555.94
1235	4.22036	765	164.156	282.623	250.725	250.798	283.054	292.625	556.265
1236	4.22261	764	164.264	282.803	250.885	250.963	283.252	292.875	556.728
1237	4.22486	763	164.381	283.027	251.095	251.173	283.434	293.075	557.145
1238	4.22711	762	164.517	283.238	251.295	251.382	283.632	293.275	557.423
1239	4.22935	761	164.615	283.418	251.505	251.562	283.846	293.5	557.655
1240	4.23159	760	164.742	283.642	251.685	251.757	284.044	293.675	558.118
1241	4.23383	759	164.876	283.853	251.875	251.938	284.242	294	558.349
1242	4.23607	758	164.976	284.048	252.015	252.088	284.44	294.2	558.766
1243	4.2383	757	165.083	284.257	252.175	252.282	284.638	294.425	558.951
1244	4.24054	756	165.209	284.438	252.375	252.493	284.869	294.6	559.275
1245	4.24277	755	165.345	284.663	252.595	252.657	285.067	294.775	559.598
1246	4.24499	754	165.462	284.798	252.775	252.852	285.265	295	560.014
1247	4.24722	753	165.614	285.098	252.945	253.018	285.48	295.2	560.476
1248	4.24944	752	165.74	285.293	253.135	253.213	285.694	295.4	560.8
1249	4.25167	751	165.839	285.479	253.285	253.347	285.876	295.575	561.123
1250	4.25389	750	165.947	285.623	253.465	253.542	286.074	295.825	561.4
1251	4.2561	749	166.065	285.803	253.635	253.708	286.239	296.025	561.862
1252	4.25832	748	166.181	286.027	253.825	253.903	286.437	296.25	562.323
1253	4.26053	747	166.316	286.238	253.975	254.097	286.635	296.525	562.6
1254	4.26274	746	166.416	286.447	254.165	254.278	286.833	296.725	562.922
1255	4.26495	745	166.542	286.613	254.355	254.472	287.031	296.9	563.245
1256	4.26716	744	166.677	286.822	254.515	254.637	287.212	297.1	563.522
1257	4.26936	743	166.829	287.017	254.725	254.803	287.41	297.275	564.028
1258	4.27156	742	166.964	287.212	254.915	255.028	287.625	297.5	564.305
1259	4.27376	741	167.1	287.392	255.165	255.252	287.823	297.775	564.627
1260	4.27596	740	167.262	287.603	255.325	255.433	288.004	297.975	565.041
1261	4.27816	739	167.397	287.798	255.525	255.597	288.202	298.2	565.409
1262	4.28035	738	167.477	288.007	255.685	255.762	288.4	298.425	565.823
1263	4.28254	737	167.603	288.173	255.845	255.928	288.598	298.625	566.191
1264	4.28473	736	167.7	288.413	256.035	256.123	288.796	298.85	566.467
1265	4.28692	735	167.797	288.668	256.225	256.332	289.06	299.075	566.742
1266	4.2891	734	167.946	288.923	256.475	256.558	289.341	299.3	567.064
1267	4.29129	733	168.071	289.147	256.665	256.767	289.555	299.525	567.34
1268	4.29347	732	168.197	289.327	256.805	256.947	289.753	299.75	567.753
1269	4.29565	731	168.297	289.522	257.065	257.127	289.935	299.975	568.12
1270	4.29783	730	168.44	289.688	257.215	257.322	290.133	300.2	568.441
1271	4.3	729	168.576	289.882	257.375	257.473	290.314	300.375	568.808
1272	4.30217	728	168.71	290.062	257.525	257.652	290.496	300.575	569.221
1273	4.30434	727	168.827	290.228	257.715	257.788	290.677	300.775	569.588
1274	4.30651	726	168.953	290.408	257.905	257.952	290.842	300.95	569.817
1275	4.30868	725	169.071	290.603	258.05	258.087	291.024	301.15	570.183
1276	4.31084	724	169.151	290.783	258.2	258.252	291.205	301.3	570.412
1277	4.31301	723	169.286	290.962	258.375	258.447	291.37	301.5	570.825
1278	4.31517	722	169.386	291.158	258.525	258.613	291.568	301.675	571.145
1279	4.31733	721	169.502	291.308	258.695	258.777	291.717	301.9	571.42
1280	4.31948	720	169.583	291.517	258.865	258.942	291.898	302.1	571.74
1281	4.32164	719	169.727	291.668	259.065	259.168	292.08	302.35	572.197
1282	4.32379	718	169.835	291.877	259.265	259.332	292.261	302.575	572.517
1283	4.32594	717	169.962	292.072	259.435	259.498	292.459	302.775	572.883
1284	4.32809	716	170.06	292.207	259.565	259.647	292.624	302.95	573.203
1285	4.33024	715	170.15	292.342	259.715	259.798	292.789	303.15	573.66
1286	4.33238	714	170.276	292.522	259.875	259.962	292.971	303.375	573.934
1287	4.33452	713	170.439	292.725	260.105	260.158	293.169	303.6	574.208
1288	4.33666	712	170.537	292.948	260.285	260.352	293.409	303.775	574.482
1289	4.3388	711	170.655	293.17	260.465	260.548	293.581	303.975	574.801
1290	4.34094	710	170.78	293.402	260.635	260.712	293.796	304.175	575.212
1291	4.34307	709	170.888	293.598	260.795	260.892	293.994	304.375	575.44
1292	4.34521	708	171.006	293.748	260.975	261.058	294.175	304.625	575.85
1293	4.34734	707	171.105	293.882	261.113	261.207	294.324	304.8	576.215
1294	4.34947	706	171.231	294.033	261.225	261.342	294.472	304.975	576.534
1295	4.3516	705	171.365	294.228	261.405	261.538	294.687	305.15	576.853
1296	4.35372	704	171.474	294.467	261.575	261.717	294.868	305.35	577.171
1297	4.35584	703	171.6	294.618	261.775	261.882	295.083	305.55	577.536
1298	4.35797	702	171.762	294.827	261.935	262.077	295.281	305.75	577.763
1299	4.36008	701	171.887	294.993	262.125	262.243	295.462	305.95	578.082
1300	4.3622	700	171.969	295.217	262.255	262.423	295.644	306.15	578.537
1301	4.36432	699	172.095	295.473	262.515	262.618	295.891	306.35	578.9
1302	4.36643	698	172.194	295.637	262.665	262.767	296.056	306.5	579.264
1303	4.36854	697	172.274	295.788	262.815	262.933	296.205	306.7	579.719
1304	4.37065	696	172.41	295.983	263.005	263.082	296.403	306.9	579.991
1305	4.37276	695	172.508	296.178	263.175	263.262	296.617	307.075	580.4
1306	4.37487	694	172.617	296.433	263.395	263.488	296.815	307.3	580.718
1307	4.37697	693	172.779	296.627	263.575	263.668	297.046	307.525	580.99
1308	4.37908	692	172.913	296.913	263.715	263.863	297.277	307.7	581.444
1309	4.38118	691	173.022	297.137	263.955	264.072	297.525	307.975	581.716
1310	4.38328	690	173.174	297.332	264.1	264.207	297.723	308.1	581.988
1311	4.38537	689	173.264	297.558	264.305	264.402	297.97	308.3	582.441
1312	4.38747	688	173.355	297.812	264.462	264.553	298.185	308.475	582.804
1313	4.38956	687	173.463	297.962	264.561	264.688	298.366	308.65	583.393
1314	4.39165	686	173.553	298.106	264.725	264.822	298.531	308.825	583.71
1315	4.39374	685	173.661	298.226	264.845	264.957	298.663	309	584.072
1316	4.39583	684	173.786	298.397	264.985	265.108	298.812	309.225	584.389
1317	4.39792	683	173.894	298.577	265.155	265.288	298.993	309.475	584.66
1318	4.4	682	174.02	298.728	265.335	265.438	299.158	309.675	585.022
1319	4.40208	681	174.119	298.892	265.495	265.587	299.323	309.9	585.338
1320	4.40416	680	174.227	299.163	265.645	265.777	299.604	310.15	585.655
1321	4.40624	679	174.345	299.342	265.775	265.979	299.785	310.325	585.971
1322	4.40832	678	174.452	299.478	265.975	266.167	299.917	310.525	586.649
1323	4.41039	677	174.588	299.702	266.105	266.35	300.099	310.7	586.829
1324	4.41247	676	174.686	299.868	266.275	266.557	300.264	310.925	587.236
1325	4.41454	675	174.804	300.092	266.455	266.703	300.511	311.125	587.461
1326	4.41661	674	174.929	300.288	266.645	266.892	300.676	311.325	587.642
1327	4.41868	673	175.019	300.498	266.825	267.141	300.907	311.5	587.913
1328	4.42074	672	175.145	300.738	266.985	267.353	301.122	311.725	588.409
1329	4.42281	671	175.28	300.993	267.185	267.522	301.402	311.975	588.769
1330	4.42487	670	175.388	301.188	267.375	267.688	301.6	312.175	589.04
1331	4.42693	669	175.514	301.397	267.545	267.853	301.848	312.325	589.445
1332	4.42899	668	175.623	301.562	267.705	268.002	301.996	312.525	589.67
1333	4.43105	667	175.739	301.728	267.905	268.183	302.178	312.7	590.121
1334	4.43311	666	175.839	301.938	268.085	268.332	302.409	312.9	590.436
1335	4.43516	665	175.956	302.132	268.245	268.483	302.557	313.125	590.751
1336	4.43721	664	176.09	302.312	268.375	268.692	302.755	313.325	591.021
1337	4.43926	663	176.19	302.493	268.575	268.91	302.953	313.525	591.425
1338	4.44131	662	176.306	302.658	268.765	269.173	303.118	313.725	591.74
1339	4.44336	661	176.387	302.822	268.925	269.353	303.283	313.925	592.145
1340	4.4454	660	176.505	303.062	269.065	269.517	303.481	314.175	592.594
1341	4.44745	659	176.595	303.257	269.255	269.683	303.712	314.4	593.178
1342	4.44949	658	176.694	303.483	269.425	269.923	303.927	314.575	593.402
1343	4.45153	657	176.828	303.752	269.625	270.087	304.207	314.8	593.717
1344	4.45357	656	176.946	303.962	269.845	270.207	304.372	314.975	593.986
1345	4.45561	655	177.036	304.098	270.005	270.387	304.521	315.15	594.255
1346	4.45764	654	177.153	304.277	270.175	270.613	304.653	315.35	594.569
1347	4.45967	653	177.279	304.533	270.295	270.733	304.917	315.55	594.793
1348	4.46171	652	177.405	304.697	270.5	270.853	305.115	315.725	595.152
1349	4.46374	651	177.494	304.892	270.705	271.018	305.313	315.925	595.51
1350	4.46577	650	177.602	305.072	270.975	271.173	305.461	316.175	596.048
1351	4.46779	649	177.728	305.198	271.115	271.377	305.61	316.375	596.361
1352	4.46982	648	177.873	305.4	271.315	271.603	305.791	316.55	596.63
1353	4.47184	647	177.989	305.613	271.535	271.738	306.022	316.8	596.898
1354	4.47386	646	178.115	305.808	271.688	271.858	306.22	317.025	597.212
1355	4.47588	645	178.232	306.062	271.849	272.098	306.468	317.175	597.569
1356	4.4779	644	178.332	306.243	271.975	272.248	306.649	317.375	597.838
1357	4.47992	643	178.43	306.438	272.215	272.413	306.864	317.6	598.24
1358	4.48193	642	178.556	306.632	272.375	272.637	307.062	317.9	598.598
1359	4.48395	641	178.655	306.887	272.595	272.772	307.309	318.125	599.044
1360	4.48596	640	178.763	307.082	272.765	272.923	307.491	318.3	599.446
1361	4.48797	639	178.881	307.293	272.945	273.058	307.672	318.525	599.982
1362	4.48998	638	179.006	307.488	273.125	273.207	307.837	318.775	600.294
1363	4.49199	637	179.13	307.683	273.265	273.373	308.019	318.975	600.607
1364	4.49399	636	179.222	307.908	273.435	273.553	308.25	319.175	600.963
1365	4.496	635	179.357	308.087	273.625	273.733	308.431	319.425	601.365
1366	4.498	634	179.475	308.312	273.825	273.913	308.629	319.625	601.721
1367	4.5	633	179.601	308.45	273.975	274.048	308.811	319.825	602.122
1368	4.502	632	179.69	308.6	274.125	274.212	308.992	320	602.701
1369	4.504	631	179.79	308.793	274.325	274.392	309.174	320.2	603.057
1370	4.50599	630	179.924	308.973	274.525	274.632	309.372	320.425	603.324
1371	4.50799	629	180.069	309.183	274.721	274.858	309.57	320.625	603.636
1372	4.50998	628	180.149	309.348	274.875	274.967	309.718	320.825	603.947
1373	4.51197	627	180.257	309.512	275.05	275.1	309.867	321.025	604.214
1374	4.51396	626	180.329	309.718	275.175	275.233	310.032	321.2	604.525
1375	4.51595	625	180.446	309.881	275.335	275.413	310.197	321.4	604.836
1376	4.51794	624	180.51	310.093	275.505	275.577	310.395	321.6	605.147
1377	4.51992	623	180.626	310.21	275.675	275.757	310.593	321.775	605.68
1378	4.5219	622	180.78	310.382	275.9	275.952	310.807	322	606.168
1379	4.52389	621	180.915	310.623	276.075	276.118	310.972	322.275	606.346
1380	4.52587	620	181.049	310.877	276.255	276.327	311.236	322.5	606.745
1381	4.52784	619	181.135	311.103	276.425	276.478	311.434	322.7	607.1
1382	4.52982	618	181.202	311.252	276.575	276.658	311.632	322.875	607.455
1383	4.5318	617	181.31	311.433	276.765	276.837	311.797	323.1	607.765
1384	4.53377	616	181.436	311.627	276.915	277.062	311.962	323.35	608.12
1385	4.53574	615	181.562	311.853	277.125	277.257	312.243	323.55	608.385
1386	4.53772	614	181.653	312.048	277.325	277.438	312.441	323.725	608.828
1387	4.53969	613	181.743	312.257	277.565	277.663	312.639	323.95	609.182
1388	4.54165	612	181.859	312.452	277.725	277.812	312.82	324.15	609.492
1389	4.54362	611	181.986	312.663	277.875	277.993	312.985	324.375	609.935
1390	4.54558	610	182.094	312.887	278.075	278.173	313.2	324.6	610.377
1391	4.54755	609	182.21	313.067	278.235	278.382	313.414	324.825	610.775
1392	4.54951	608	182.31	313.277	278.435	278.533	313.629	325.075	611.04
1393	4.55147	607	182.427	313.488	278.615	278.712	313.86	325.25	611.482
1394	4.55343	606	182.553	313.712	278.815	278.923	314.091	325.475	611.703
1395	4.55539	605	182.706	313.938	279.035	279.132	314.322	325.675	612.012
1396	4.55734	604	182.78	314.118	279.145	279.252	314.487	325.875	612.453
1397	4.5593	603	182.886	314.342	279.335	279.447	314.734	326.075	612.806
1398	4.56125	602	183.038	314.553	279.545	279.658	314.965	326.325	613.027
1399	4.5632	601	183.191	314.777	279.705	279.822	315.18	326.55	613.424
1400	4.56515	600	183.309	314.988	279.935	280.048	315.378	326.8	613.732
1401	4.5671	599	183.407	315.152	280.115	280.228	315.543	327.025	613.997
1402	4.56905	598	183.524	315.348	280.285	280.392	315.724	327.2	614.305
1403	4.57099	597	183.632	315.558	280.465	280.52	315.906	327.375	614.569
1404	4.57294	596	183.714	315.767	280.605	280.707	316.153	327.575	615.054
1405	4.57488	595	183.812	315.933	280.735	280.842	316.318	327.75	615.362
1406	4.57682	594	183.921	316.098	280.905	281.022	316.5	327.925	615.758
1407	4.57876	593	184.019	316.322	281.102	281.188	316.698	328.125	616.11
1408	4.5807	592	184.119	316.517	281.3	281.382	316.912	328.325	616.506
1409	4.58263	591	184.226	316.728	281.46	281.577	317.127	328.525	616.814
1410	4.58457	590	184.308	316.952	281.635	281.728	317.341	328.7	617.209
1411	4.5865	589	184.406	317.147	281.835	281.923	317.523	328.925	617.473
1412	4.58844	588	184.524	317.342	281.995	282.072	317.704	329.15	617.912
1413	4.59037	587	184.677	317.507	282.185	282.267	317.902	329.325	618.263
1414	4.5923	586	184.803	317.688	282.345	282.418	318.1	329.525	618.571
1415	4.59422	585	184.911	317.837	282.535	282.598	318.232	329.825	618.834
1416	4.59615	584	185.028	318.033	282.685	282.748	318.397	330	619.185
1417	4.59808	583	185.136	318.186	282.825	282.868	318.546	330.175	619.492
1418	4.6	582	185.234	318.35	282.935	283.033	318.711	330.325	619.799
1419	4.60192	581	185.325	318.57	283.105	283.168	318.892	330.525	620.281
1420	4.60384	580	185.441	318.743	283.275	283.348	319.107	330.775	620.544
1421	4.60576	579	185.567	318.923	283.475	283.527	319.305	330.975	621.07
1422	4.60768	578	185.667	319.087	283.625	283.723	319.47	331.15	621.464
1423	4.6096	577	185.81	319.283	283.785	283.873	319.668	331.325	621.814
1424	4.61151	576	185.928	319.478	284.015	284.082	319.932	331.6	622.033
1425	4.61343	575	186.018	319.688	284.185	284.293	320.113	331.8	622.47
1426	4.61534	574	186.117	319.853	284.335	284.442	320.278	332	622.732
1427	4.61725	573	186.233	320.048	284.495	284.637	320.46	332.2	623.213
1428	4.61916	572	186.341	320.197	284.685	284.788	320.608	332.4	623.519
1429	4.62107	571	186.458	320.363	284.835	284.938	320.757	332.65	623.912
1430	4.62298	570	186.566	320.543	285.005	285.058	320.922	332.85	624.436
1431	4.62488	569	186.674	320.738	285.185	285.252	321.136	333.05	624.917
1432	4.62679	568	186.782	320.978	285.385	285.447	321.351	333.25	625.135
1433	4.62869	567	186.881	321.158	285.555	285.598	321.565	333.425	625.484
1434	4.63059	566	186.981	321.353	285.685	285.777	321.73	333.65	625.789
1435	4.63249	565	187.089	321.533	285.905	285.973	321.928	333.875	626.094
1436	4.63439	564	187.25	321.697	286.075	286.183	322.093	334.075	626.574
1437	4.63629	563	187.376	321.908	286.265	286.377	322.291	334.3	626.922
1438	4.63818	562	187.494	322.118	286.505	286.572	322.555	334.525	627.096
1439	4.64008	561	187.637	322.342	286.675	286.738	322.753	334.725	627.532
1440	4.64197	560	187.755	322.582	286.875	286.933	322.935	334.9	627.924
1441	4.64386	559	187.853	322.777	287.065	287.142	323.1	335.2	628.228
1442	4.64575	558	187.988	322.957	287.245	287.337	323.343	335.4	628.663
1443	4.64764	557	188.114	323.183	287.475	287.533	323.529	335.653	629.054
1444	4.64953	556	188.25	323.392	287.675	287.743	323.826	335.9	629.402
1445	4.65141	555	188.339	323.558	287.825	287.908	323.991	336.075	629.706
1446	4.6533	554	188.447	323.707	287.965	288.072	324.182	336.275	630.097
1447	4.65518	553	188.555	323.873	288.125	288.192	324.395	336.525	630.315
1448	4.65707	552	188.663	324.098	288.335	288.433	324.552	336.725	630.705
1449	4.65895	551	188.78	324.308	288.525	288.613	324.718	336.9	631.096
1450	4.66083	550	188.888	324.502	288.725	288.822	324.9	337.15	631.443
1451	4.66271	549	188.996	324.697	288.865	288.973	325.047	337.35	631.703
1452	4.66458	548	189.095	324.892	289.075	289.137	325.195	337.55	631.963
1453	4.66646	547	189.203	325.043	289.215	289.272	325.344	337.725	632.267
1454	4.66833	546	189.329	325.207	289.375	289.438	325.492	337.975	632.57
1455	4.67021	545	189.429	325.402	289.555	289.618	325.7	338.125	632.83
1456	4.67208	544	189.518	325.582	289.665	289.752	325.9	338.3	633.177
1457	4.67395	543	189.626	325.793	289.875	289.947	326.021	338.475	633.437
1458	4.67582	542	189.726	325.973	290.045	290.098	326.252	338.65	633.783
1459	4.67769	541	189.851	326.123	290.235	290.293	326.44	338.85	634.216
1460	4.67955	540	189.987	326.25	290.355	290.442	326.612	339.15	634.519
1461	4.68142	539	190.113	326.377	290.515	290.637	326.763	339.325	634.735
1462	4.68328	538	190.202	326.587	290.685	290.788	326.908	339.5	635.038
1463	4.68514	537	190.338	326.738	290.835	290.923	327.097	339.725	635.34
1464	4.68701	536	190.464	326.873	290.985	291.072	327.307	339.925	635.945
1465	4.68887	535	190.589	327.067	291.215	291.298	327.604	340.175	636.291
1466	4.69072	534	190.707	327.233	291.365	291.447	327.758	340.4	636.55
1467	4.69258	533	190.787	327.428	291.585	291.642	327.901	340.575	636.895
1468	4.69444	532	190.88	327.652	291.735	291.793	328.066	340.75	637.197
1469	4.69629	531	190.98	327.817	291.865	291.928	328.182	340.925	637.456
1470	4.69815	530	191.132	327.967	292.065	292.1	328.33	341.1	637.672
1471	4.7	529	191.228	328.178	292.235	292.303	328.545	341.275	637.974
1472	4.70185	528	191.327	328.373	292.455	292.5	328.743	341.525	638.362
1473	4.7037	527	191.453	328.582	292.655	292.723	328.974	341.75	638.663
1474	4.70555	526	191.561	328.808	292.865	292.947	329.155	341.975	639.008
1475	4.7074	525	191.688	328.973	293.035	293.082	329.353	342.2	639.439
1476	4.70924	524	191.786	329.137	293.175	293.262	329.598	342.4	639.697
1477	4.71109	523	191.904	329.332	293.375	293.473	329.766	342.625	639.912
1478	4.71293	522	192.056	329.5	293.585	293.697	329.95	342.825	640.171
1479	4.71477	521	192.165	329.65	293.7	293.938	330.12	343.05	640.601
1480	4.71662	520	192.263	329.798	293.815	294.072	330.261	343.275	640.945
1481	4.71846	519	192.381	329.962	293.975	294.238	330.459	343.5	641.203
1482	4.72029	518	192.48	330.158	294.135	294.433	330.739	343.725	641.59
1483	4.72213	517	192.58	330.368	294.315	294.598	330.92	343.95	641.977
1484	4.72397	516	192.678	330.577	294.525	294.777	331.1	344.2	642.277
1485	4.7258	515	192.776	330.788	294.675	294.988	331.267	344.4	642.578
1486	4.72764	514	192.903	331.027	294.885	295.168	331.465	344.575	642.878
1487	4.72947	513	193.029	331.192	295.085	295.363	331.614	344.775	643.222
1488	4.7313	512	193.163	331.358	295.285	295.512	331.828	345.025	643.565
1489	4.73313	511	193.272	331.553	295.425	295.723	332.05	345.225	643.822
1490	4.73496	510	193.362	331.793	295.625	295.873	332.2	345.425	644.208
1491	4.73679	509	193.452	332.017	295.805	296.082	332.4	345.675	644.551
1492	4.73861	508	193.6	332.228	295.995	296.308	332.571	345.925	644.894
1493	4.74044	507	193.757	332.423	296.185	296.488	332.802	346.15	645.279
1494	4.74226	506	193.883	332.587	296.395	296.652	332.967	346.35	645.665
1495	4.74408	505	194.018	332.767	296.585	296.788	333.132	346.525	645.965
1496	4.74591	504	194.198	332.962	296.725	296.983	333.363	346.725	646.435
1497	4.74773	503	194.361	333.127	296.885	297.132	333.544	346.9	646.735
1498	4.74955	502	194.487	333.322	297.045	297.298	333.726	347.075	647.034
1499	4.75136	501	194.603	333.548	297.235	297.493	333.973	347.275	647.547
1500	4.75318	500	194.712	333.712	297.395	297.658	334.138	347.45	647.889
1501	4.755	499	194.838	333.952	297.565	297.868	334.386	347.65	648.273
1502	4.75681	498	194.954	334.178	297.765	298.048	334.6	348	648.572
1503	4.75862	497	195.089	334.373	297.965	298.243	334.782	348.225	648.914
1504	4.76043	496	195.2	334.538	298.155	298.377	334.947	348.45	649.17
1505	4.76225	495	195.3	334.717	298.315	298.498	335.112	348.625	649.511
1506	4.76405	494	195.395	334.928	298.455	298.692	335.31	348.8	649.981
1507	4.76586	493	195.512	335.092	298.635	298.858	335.491	349	650.279
1508	4.76767	492	195.674	335.272	298.765	299.022	335.673	349.2	650.62
1509	4.76948	491	195.792	335.498	298.925	299.225	335.904	349.45	650.918
1510	4.77128	490	195.909	335.647	299.115	299.4	336.069	349.675	651.217
1511	4.77308	489	196.025	335.827	299.275	299.52	336.234	349.9	651.557
1512	4.77489	488	196.161	336.067	299.475	299.743	336.448	350.125	651.983
1513	4.77669	487	196.232	336.262	299.73	299.908	336.63	350.325	652.281
1514	4.77849	486	196.358	336.397	299.835	300.058	336.811	350.5	652.749
1515	4.78029	485	196.476	336.548	299.985	300.192	336.943	350.7	653.047
1516	4.78209	484	196.593	336.743	300.145	300.342	337.092	350.9	653.259
1517	4.78388	483	196.683	336.877	300.275	300.478	337.257	351.1	653.727
1518	4.78568	482	196.791	337.027	300.475	300.613	337.389	351.275	654.194
1519	4.78747	481	196.925	337.207	300.665	300.777	337.537	351.45	654.661
1520	4.78927	480	197.034	337.433	300.825	300.928	337.785	351.625	654.958
1521	4.79106	479	197.15	337.582	301.025	301.123	337.95	351.8	655.255
1522	4.79285	478	197.268	337.837	301.175	301.272	338.131	351.975	655.595
1523	4.79464	477	197.385	338.048	301.425	301.543	338.395	352.125	656.019
1524	4.79643	476	197.511	338.212	301.655	301.738	338.56	352.325	656.273
1525	4.79821	475	197.673	338.392	301.865	301.933	338.742	352.5	656.57
1526	4.8	474	197.798	338.603	302.075	302.173	338.94	352.675	656.951
1527	4.80179	473	197.898	338.827	302.255	302.382	339.187	352.95	657.29
1528	4.80357	472	198.032	339.053	302.455	302.548	339.385	353.15	657.502
1529	4.80535	471	198.123	339.248	302.675	302.757	339.583	353.35	657.756
1530	4.80713	470	198.213	339.442	302.865	302.952	339.765	353.75	658.01
1531	4.80891	469	198.347	339.697	303.035	303.147	340.029	353.95	658.391
1532	4.81069	468	198.438	339.892	303.215	303.327	340.227	354.175	658.687
1533	4.81247	467	198.554	340.163	303.405	303.538	340.524	354.35	659.025
1534	4.81425	466	198.662	340.327	303.585	303.717	340.705	354.525	659.279
1535	4.81603	465	198.77	340.493	303.765	303.868	340.87	354.75	659.617
1536	4.8178	464	198.879	340.642	303.945	304.048	341.035	355	659.871
1537	4.81957	463	198.987	340.777	304.075	304.197	341.167	355.149	660.209
1538	4.82135	462	199.095	340.973	304.235	304.348	341.316	355.35	660.546
1539	4.82312	461	199.194	341.137	304.375	304.543	341.497	355.525	660.715
1540	4.82489	460	199.32	341.363	304.585	304.723	341.679	355.75	661.137
1541	4.82666	459	199.454	341.543	304.795	304.887	341.91	355.95	661.433
1542	4.82843	458	199.544	341.767	304.975	305.098	342.091	356.175	661.855
1543	4.83019	457	199.697	341.962	305.175	305.277	342.306	356.4	662.065
1544	4.83196	456	199.833	342.217	305.375	305.488	342.553	356.625	662.445
1545	4.83373	455	199.931	342.397	305.535	305.623	342.751	356.8	662.698
1546	4.83549	454	200.048	342.592	305.715	305.803	342.916	357	663.119
1547	4.83725	453	200.156	342.757	305.875	305.983	343.114	357.225	663.456
1548	4.83901	452	200.256	342.967	306.035	306.147	343.279	357.425	663.751
1549	4.84077	451	200.381	343.118	306.165	306.283	343.444	357.6	664.045
1550	4.84253	450	200.489	343.298	306.325	306.418	343.626	357.775	664.382
1551	4.84429	449	200.633	343.462	306.485	306.582	343.774	358	664.761
1552	4.84605	448	200.778	343.6	306.665	306.762	343.939	358.25	665.097
1553	4.84781	447	200.912	343.825	306.835	306.928	344.104	358.45	665.349
1554	4.84956	446	201.012	343.967	307.025	307.137	344.302	358.625	665.727
1555	4.85132	445	201.129	344.163	307.205	307.317	344.5	358.825	666.021
1556	4.85307	444	201.255	344.342	307.385	307.483	344.682	359.075	666.399
1557	4.85482	443	201.345	344.567	307.575	307.663	344.88	359.3	666.651
1558	4.85657	442	201.444	344.733	307.695	307.798	345.028	359.475	666.987
1559	4.85832	441	201.534	344.913	307.825	307.947	345.21	359.65	667.197
1560	4.86007	440	201.66	345.062	308.005	308.098	345.358	359.8	667.533
1561	4.86182	439	201.776	345.243	308.175	308.248	345.556	359.975	667.868
1562	4.86356	438	201.893	345.423	308.325	308.428	345.771	360.15	668.162
1563	4.86531	437	201.975	345.603	308.525	308.623	345.936	360.35	668.371
1564	4.86705	436	202.083	345.812	308.715	308.817	346.167	360.525	668.623
1565	4.8688	435	202.19	346.067	308.895	308.998	346.398	360.725	668.916
1566	4.87054	434	202.29	346.248	309.075	309.147	346.579	360.925	669.335
1567	4.87228	433	202.416	346.397	309.215	309.283	346.711	361.1	669.586
1568	4.87402	432	202.514	346.562	309.375	309.433	346.909	361.3	669.921
1569	4.87576	431	202.659	346.772	309.565	309.642	347.107	361.625	670.172
1570	4.8775	430	202.767	346.967	309.735	309.822	347.305	361.75	670.59
1571	4.87924	429	202.883	347.163	309.915	310.002	347.52	361.95	671.092
1572	4.88097	428	202.992	347.312	310.095	310.197	347.685	362.125	671.385
1573	4.88271	427	203.118	347.522	310.245	310.363	347.858	362.325	671.635
1574	4.88444	426	203.234	347.717	310.395	310.527	348.048	362.55	672.095
1575	4.88617	425	203.333	347.897	310.585	310.692	348.279	362.775	672.596
1576	4.88791	424	203.433	348.077	310.765	310.858	348.427	362.95	673.013
1577	4.88964	423	203.541	348.272	310.925	311.038	348.592	363.2	673.347
1578	4.89137	422	203.657	348.467	311.075	311.188	348.757	363.4	673.597
1579	4.8931	421	203.756	348.618	311.255	311.337	348.988	363.55	673.973
1580	4.89482	420	203.874	348.812	311.425	311.488	349.153	363.75	674.265
1581	4.89655	419	203.982	349.007	311.585	311.683	349.368	363.925	674.723
1582	4.89828	418	204.107	349.202	311.795	311.848	349.566	364.125	675.014
1583	4.9	417	204.197	349.397	311.975	312.012	349.731	364.4	675.473
1584	4.90172	416	204.315	349.592	312.165	312.207	349.945	364.6	676.014
1585	4.90345	415	204.423	349.772	312.315	312.373	350.127	364.8	676.263
1586	4.90517	414	204.558	349.967	312.485	312.553	350.308	365	676.596
1587	4.90689	413	204.648	350.163	312.665	312.733	350.506	365.2	676.887
1588	4.90861	412	204.8	350.358	312.825	312.928	350.688	365.425	677.22
1589	4.91033	411	204.863	350.522	312.975	313.062	350.853	365.625	677.635
1590	4.91204	410	205.017	350.748	313.175	313.257	351.067	365.8	677.967
1591	4.91376	409	205.143	350.973	313.375	313.423	351.282	366.025	678.466
1592	4.91548	408	205.25	351.152	313.515	313.587	351.463	366.225	678.798
1593	4.91719	407	205.386	351.363	313.715	313.767	351.682	366.425	679.13
1594	4.9189	406	205.52	351.527	313.875	313.962	351.876	366.675	679.462
1595	4.92062	405	205.629	351.692	314.025	314.127	352.041	366.875	679.752
1596	4.92233	404	205.755	351.858	314.205	314.293	352.206	367.075	680.083
1597	4.92404	403	205.889	352.022	314.375	314.442	352.371	367.25	680.374
1598	4.92575	402	205.998	352.202	314.495	314.592	352.552	367.525	680.746
1599	4.92746	401	206.124	352.382	314.675	314.743	352.717	367.725	680.995
1600	4.92916	400	206.214	352.592	314.835	314.923	352.899	367.9	681.326
1601	4.93087	399	206.357	352.772	315.025	315.103	353.113	368.1	681.74
1602	4.93258	398	206.501	352.967	315.225	315.312	353.311	368.375	682.154
1603	4.93428	397	206.637	353.192	315.425	315.493	353.526	368.575	682.443
1604	4.93598	396	206.736	353.373	315.535	315.613	353.691	368.75	682.815
1605	4.93769	395	206.862	353.553	315.675	315.762	353.872	368.95	683.146
1606	4.93939	394	206.97	353.748	315.805	315.913	354.037	369.15	683.559
1607	4.94109	393	207.105	353.957	316.085	316.123	354.268	369.45	683.972
1608	4.94279	392	207.239	354.152	316.195	316.348	354.45	369.625	684.344
1609	4.94449	391	207.347	354.317	316.405	316.543	354.664	369.825	684.674
1610	4.94618	390	207.446	354.527	316.575	316.692	354.862	370.05	685.004
1611	4.94788	389	207.572	354.723	316.735	316.842	355.044	370.225	685.21
1612	4.94958	388	207.716	354.933	316.975	317.053	355.225	370.425	685.582
1613	4.95127	387	207.798	355.067	317.135	317.202	355.374	370.575	685.829
1614	4.95296	386	207.9	355.202	317.265	317.368	355.522	370.775	686.117
1615	4.95466	385	208.023	355.413	317.435	317.548	355.753	371.05	686.447
1616	4.95635	384	208.139	355.623	317.625	317.728	355.951	371.225	686.859
1617	4.95804	383	208.256	355.832	317.815	317.908	356.182	371.4	687.312
1618	4.95973	382	208.4	356.072	317.985	318.103	356.38	371.6	687.641
1619	4.96142	381	208.518	356.267	318.185	318.298	356.578	371.875	687.97
1620	4.96311	380	208.643	356.433	318.375	318.462	356.76	372.05	688.217
1621	4.96479	379	208.761	356.598	318.535	318.627	356.941	372.225	688.669
1622	4.96648	378	208.877	356.777	318.655	318.762	357.09	372.4	689.039
1623	4.96816	377	209.004	356.988	318.865	318.957	357.321	372.6	689.245
1624	4.96985	376	209.094	357.197	318.995	319.123	357.519	372.775	689.532
1625	4.97153	375	209.256	357.452	319.235	319.363	357.799	373	689.82
1626	4.97321	374	209.391	357.663	319.465	319.572	358.03	373.25	690.189
1627	4.97489	373	209.489	357.858	319.645	319.752	358.228	373.45	690.476
1628	4.97658	372	209.597	358.022	319.795	319.902	358.377	373.65	690.682
1629	4.97825	371	209.732	358.233	320.035	320.113	358.591	373.85	691.051
1630	4.97993	370	209.822	358.473	320.175	320.248	358.839	374.075	691.338
1631	4.98161	369	209.948	358.697	320.385	320.428	359.037	374.275	691.584
1632	4.98329	368	210.075	358.892	320.565	320.637	359.218	374.425	691.912
1633	4.98496	367	210.201	359.1	320.725	320.832	359.4	374.625	692.321
1634	4.98664	366	210.327	359.215	320.885	320.967	359.565	374.8	692.608
1635	4.98831	365	210.452	359.358	321.025	321.132	359.746	375	692.936
1636	4.98998	364	210.542	359.598	321.185	321.298	359.944	375.2	693.181
1637	4.99166	363	210.678	359.733	321.385	321.478	360.093	375.4	693.509
1638	4.99333	362	210.776	359.928	321.565	321.642	360.274	375.55	693.918
1639	4.995	361	210.911	360.123	321.725	321.808	360.456	375.75	694.163
1640	4.99666	360	211.019	360.303	321.865	321.957	360.654	375.95	694.531
1641	4.99833	359	211.155	360.483	322.055	322.137	360.835	376.175	694.776
1642	5	358	211.28	360.632	322.215	322.303	360.984	376.35	695.185
1643	5.00167	357	211.398	360.783	322.365	322.438	361.165	376.575	695.552
1644	5.00333	356	211.506	360.962	322.5	322.632	361.297	376.775	695.879
1645	5.005	355	211.613	361.158	322.725	322.798	361.446	376.95	696.287
1646	5.00666	354	211.731	361.337	322.875	322.947	361.644	377.15	696.573
1647	5.00832	353	211.857	361.517	323.045	323.127	361.809	377.3	696.817
1648	5.00998	352	211.938	361.637	323.175	323.293	361.974	377.475	697.184
1649	5.01164	351	212.064	361.877	323.355	323.488	362.172	377.675	697.51
1650	5.0133	350	212.216	362.163	323.565	323.668	362.436	377.875	697.918
1651	5.01496	349	212.333	362.373	323.775	323.877	362.7	378.075	698.203
1652	5.01662	348	212.451	362.522	323.925	324.027	362.865	378.275	698.61
1653	5.01828	347	212.567	362.702	324.085	324.147	363.03	378.525	699.017
1654	5.01993	346	212.657	362.868	324.245	324.327	363.211	378.725	699.221
1655	5.02159	345	212.792	363.077	324.405	324.462	363.426	378.9	699.668
1656	5.02324	344	212.918	363.288	324.575	324.688	363.607	379.075	699.994
1657	5.0249	343	213.054	363.512	324.765	324.853	363.805	379.275	700.359
1658	5.02655	342	213.197	363.663	324.965	325.048	364.003	379.525	700.644
1659	5.0282	341	213.333	363.858	325.125	325.257	364.168	379.7	700.969
1660	5.02985	340	213.431	364.098	325.315	325.408	364.399	379.875	701.294
1661	5.0315	339	213.53	364.277	325.445	325.572	364.581	380.05	701.578
1662	5.03315	338	213.638	364.473	325.595	325.738	364.779	380.225	701.943
1663	5.0348	337	213.782	364.683	325.755	325.902	364.95	380.5	702.268
1664	5.03645	336	213.927	364.892	325.895	326.053	365.12	380.7	702.755
1665	5.03809	335	214.053	365.087	326.045	326.25	365.3	380.925	703.119
1666	5.03974	334	214.161	365.267	326.315	326.457	365.5	381.15	703.525
1667	5.04138	333	214.296	365.462	326.485	326.652	365.65	381.375	703.889
1668	5.04302	332	214.412	365.627	326.665	326.817	365.818	381.6	704.375
1669	5.04467	331	214.52	365.822	326.865	326.983	366.008	381.8	704.699
1670	5.04631	330	214.637	365.988	327.025	327.132	366.16	382	704.982
1671	5.04795	329	214.763	366.168	327.225	327.312	366.313	382.175	705.346
1672	5.04959	328	214.889	366.348	327.385	327.493	366.48	382.375	705.629
1673	5.05123	327	215.006	366.572	327.535	327.627	366.68	382.575	705.953
1674	5.05287	326	215.106	366.738	327.695	327.808	366.808	382.75	706.276
1675	5.0545	325	215.258	366.918	327.875	327.988	366.957	382.975	706.519
1676	5.05614	324	215.375	367.098	328.045	328.197	367.122	383.2	707.044
1677	5.05778	323	215.519	367.248	328.255	328.392	367.287	383.45	707.367
1678	5.05941	322	215.637	367.413	328.465	328.572	367.534	383.65	707.689
1679	5.06105	321	215.744	367.592	328.645	328.767	367.666	383.85	708.012
1680	5.06268	320	215.844	367.743	328.795	328.918	367.798	384.05	708.295
1681	5.06431	319	215.96	367.938	328.975	329.082	368.025	384.275	708.657
1682	5.06594	318	216.087	368.147	329.125	329.233	368.26	384.45	709.02
1683	5.06757	317	216.203	368.312	329.325	329.397	368.409	384.65	709.262
1684	5.0692	316	216.329	368.507	329.475	329.562	368.59	384.85	709.544
1685	5.07083	315	216.438	368.658	329.625	329.712	368.8	385.025	709.906
1686	5.07246	314	216.554	368.837	329.805	329.877	368.953	385.275	710.269
1687	5.07409	313	216.662	369.006	329.965	330.087	369.201	385.5	710.711
1688	5.07571	312	216.788	369.178	330.135	330.252	369.382	385.725	710.953
1689	5.07734	311	216.905	369.358	330.315	330.433	369.663	385.925	711.315
1690	5.07896	310	217.049	369.567	330.525	330.642	369.828	386.15	711.677
1691	5.08058	309	217.185	369.793	330.725	330.853	370.092	386.3	711.877
1692	5.08221	308	217.32	369.988	330.915	331.002	370.29	386.525	712.319
1693	5.08383	307	217.418	370.183	331.075	331.168	370.471	386.675	712.681
1694	5.08545	306	217.544	370.377	331.235	331.348	370.702	386.875	712.962
1695	5.08707	305	217.661	370.558	331.425	331.543	370.9	387.075	713.363
1696	5.08869	304	217.797	370.767	331.625	331.723	371.082	387.25	713.684
1697	5.09031	303	217.913	370.962	331.825	331.887	371.263	387.425	713.965
1698	5.09192	302	218.022	371.113	331.945	332.038	371.4	387.6	714.286
1699	5.09354	301	218.12	371.277	332.075	332.188	371.593	387.775	714.526
1700	5.09516	300	218.238	371.457	332.305	332.368	371.791	387.95	714.967
1701	5.09677	299	218.345	371.637	332.435	332.517	372.006	388.125	715.247
1702	5.09839	298	218.453	371.817	332.585	332.697	372.171	388.275	715.528
1703	5.1	297	218.589	372.012	332.745	332.848	372.352	388.425	715.768
1704	5.10161	296	218.714	372.178	332.885	333.012	372.5	388.6	716.128
1705	5.10322	295	218.858	372.342	333.015	333.147	372.682	388.775	716.448
1706	5.10483	294	218.984	372.553	333.175	333.298	372.864	388.95	716.728
1707	5.10644	293	219.093	372.762	333.355	333.478	373.062	389.225	716.968
1708	5.10805	292	219.219	372.988	333.535	333.658	373.293	389.4	717.448
1709	5.10966	291	219.345	373.197	333.685	333.837	373.491	389.6	717.728
1710	5.11127	290	219.452	373.408	333.875	333.988	373.722	389.725	717.967
1711	5.11288	289	219.57	373.603	334.045	334.168	373.92	390	718.367
1712	5.11448	288	219.696	373.767	334.235	334.348	374.085	390.2	718.646
1713	5.11609	287	219.821	373.918	334.405	334.498	374.242	390.35	719.045
1714	5.11769	286	219.947	374.082	334.565	334.663	374.398	390.55	719.325
1715	5.11929	285	220.065	374.277	334.735	334.858	374.629	390.725	719.604
1716	5.1209	284	220.181	374.457	334.915	335.022	374.811	391.025	719.803
1717	5.1225	283	220.316	374.623	335.085	335.202	375.025	391.2	719.963
1718	5.1241	282	220.442	374.803	335.265	335.353	375.141	391.375	720.481
1719	5.1257	281	220.56	374.967	335.425	335.517	375.273	391.625	720.959
1720	5.1273	280	220.677	375.147	335.585	335.683	375.438	391.825	721.198
1721	5.1289	279	220.803	375.298	335.735	335.877	375.636	392	721.556
1722	5.1305	278	220.919	375.478	335.915	336.043	375.801	392.175	721.795
1723	5.13209	277	221.054	375.688	336.095	336.223	375.999	392.375	722.073
1724	5.13369	276	221.172	375.853	336.255	336.373	376.18	392.55	722.391
1725	5.13528	275	221.315	376.048	336.415	336.522	376.345	392.75	722.749
1726	5.13688	274	221.477	376.243	336.625	336.688	376.543	392.975	723.027
1727	5.13847	273	221.613	376.408	336.815	336.853	376.708	393.2	723.345
1728	5.14006	272	221.748	376.558	336.975	337.033	376.89	393.4	723.703
1729	5.14166	271	221.874	376.685	337.1	337.168	377.022	393.625	723.941
1730	5.14325	270	221.99	376.812	337.2	337.303	377.154	393.783	724.378
1731	5.14484	269	222.117	377.022	337.375	337.483	377.319	394	724.695
1732	5.14643	268	222.233	377.173	337.575	337.692	377.517	394.225	725.211
1733	5.14802	267	222.351	377.382	337.755	337.873	377.698	394.45	725.449
1734	5.1496	266	222.458	377.533	337.905	338.007	377.847	394.625	725.726
1735	5.15119	265	222.602	377.712	338.075	338.173	378.061	394.825	725.964
1736	5.15278	264	222.702	377.863	338.225	338.337	378.21	394.975	726.321
1737	5.15436	263	222.819	378.058	338.375	338.502	378.375	395.15	726.677
1738	5.15595	262	222.945	378.207	338.585	338.683	378.54	395.325	727.033
1739	5.15753	261	223.097	378.387	338.785	338.877	378.738	395.625	727.231
1740	5.15911	260	223.25	378.582	338.925	339.043	378.903	395.8	727.588
1741	5.1607	259	223.386	378.762	339.075	339.207	379.101	395.975	727.864
1742	5.16228	258	223.52	378.913	339.255	339.342	379.233	396.175	728.299
1743	5.16386	257	223.673	379.062	339.435	339.538	379.381	396.45	728.616
1744	5.16544	256	223.827	379.243	339.585	339.702	379.563	396.65	728.932
1745	5.16702	255	223.962	379.408	339.745	339.853	379.744	396.8	729.406
1746	5.1686	254	224.078	379.587	339.925	340.017	379.926	397	729.564
1747	5.17017	253	224.204	379.738	340.045	340.168	380.058	397.15	729.879
1748	5.17175	252	224.331	379.858	340.195	340.288	380.19	397.35	730.077
1749	5.17333	251	224.465	380.038	340.365	340.452	380.355	397.55	730.55
1750	5.1749	250	224.601	380.248	340.525	340.647	380.569	397.825	730.905
1751	5.17648	249	224.744	380.428	340.695	340.812	380.767	398	731.496
1752	5.17805	248	224.862	380.608	340.865	340.962	380.949	398.175	731.772
1753	5.17962	247	224.97	380.788	341.005	341.113	381.114	398.35	732.087
1754	5.18119	246	225.105	380.967	341.165	341.293	381.279	398.525	732.442
1755	5.18277	245	225.257	381.103	341.345	341.457	381.411	398.75	732.914
1756	5.18434	244	225.383	381.267	341.525	341.608	381.609	398.95	733.111
1757	5.18591	243	225.51	381.433	341.685	341.817	381.807	399.15	733.347
1758	5.18748	242	225.626	381.642	341.875	341.998	382.005	399.325	733.661
1759	5.18904	241	225.752	381.866	342.025	342.132	382.153	399.525	734.015
1760	5.19061	240	225.887	382.017	342.215	342.283	382.335	399.75	734.251
1761	5.19218	239	226.049	382.228	342.385	342.462	382.516	399.95	734.683
1762	5.19374	238	226.185	382.408	342.585	342.658	382.714	400.15	734.919
1763	5.19531	237	226.32	382.587	342.765	342.837	382.912	400.325	735.233
1764	5.19687	236	226.454	382.767	342.935	343.002	383.11	400.5	735.586
1765	5.19844	235	226.589	382.962	343.115	343.168	383.308	400.675	735.861
1766	5.2	234	226.725	383.127	343.265	343.317	383.473	400.85	736.175
1767	5.20156	233	226.859	383.308	343.425	343.498	383.638	401.025	736.606
1768	5.20312	232	227.004	383.533	343.575	343.678	383.82	401.325	736.959
1769	5.20468	231	227.184	383.728	343.765	343.858	384.018	401.525	737.233
1770	5.20624	230	227.31	383.923	343.935	344.038	384.249	401.7	737.625
1771	5.2078	229	227.435	384.118	344.115	344.202	384.43	401.9	737.977
1772	5.20936	228	227.579	384.327	344.275	344.397	384.628	402.125	738.33
1773	5.21092	227	227.732	384.567	344.525	344.608	384.826	402.325	738.576
1774	5.21248	226	227.84	384.777	344.685	344.788	385.074	402.525	738.799
1775	5.21403	225	227.976	385.002	344.835	344.938	385.321	402.725	739.112
1776	5.21559	224	228.093	385.183	344.975	345.087	385.503	402.925	739.425
1777	5.21714	223	228.227	385.423	345.175	345.283	385.767	403.1	739.62
1778	5.2187	222	228.335	385.603	345.345	345.447	385.932	403.275	740.011
1779	5.22025	221	228.452	385.783	345.525	345.642	386.113	403.575	740.285
1780	5.2218	220	228.57	385.947	345.735	345.793	386.278	403.725	740.597
1781	5.22335	219	228.714	386.08	345.885	345.942	386.443	403.9	740.909
1782	5.2249	218	228.849	386.22	346.025	346.108	386.592	404.1	741.26
1783	5.22645	217	228.957	386.413	346.175	346.257	386.724	404.3	741.651
1784	5.228	216	229.091	386.608	346.355	346.438	386.905	404.55	741.768
1785	5.22955	215	229.236	386.817	346.585	346.647	387.169	404.75	742.041
1786	5.2311	214	229.388	387.012	346.755	346.827	387.349	404.975	742.43
1787	5.23265	213	229.506	387.238	346.935	347.007	387.515	405.175	742.703
1788	5.23419	212	229.659	387.433	347.095	347.202	387.794	405.375	742.937
1789	5.23574	211	229.767	387.673	347.275	347.382	387.978	405.55	743.248
1790	5.23728	210	229.893	387.853	347.455	347.548	388.143	405.775	743.638
1791	5.23883	209	230.01	388.048	347.625	347.712	388.341	405.975	743.91
1792	5.24037	208	230.126	388.228	347.875	347.908	388.522	406.2	744.26
1793	5.24191	207	230.252	388.363	348.015	348.058	388.654	406.425	744.572
1794	5.24345	206	230.361	388.498	348.155	348.192	388.836	406.6	744.96
1795	5.245	205	230.495	388.647	348.315	348.342	388.984	406.775	745.194
1796	5.24654	204	230.631	388.812	348.475	348.522	389.133	406.975	745.582
1797	5.24808	203	230.766	388.962	348.625	348.658	389.298	407.175	745.893
1798	5.24962	202	230.874	389.142	348.745	348.808	389.446	407.4	746.126
1799	5.25115	201	230.972	389.322	348.905	348.973	389.628	407.575	746.514
1800	5.25269	200	231.089	389.488	349.075	349.137	389.842	407.775	746.747
1801	5.25423	199	231.225	389.728		349.317	390.057	407.925	746.941
1802	5.25576	198	231.359	389.923		349.483	390.238	408.125	747.251
1803	5.2573	197	231.45	390.103		349.678	390.453	408.3	747.561
1804	5.25883	196	231.594	390.267		349.827	390.601	408.475	747.833
1805	5.26037	195	231.738	390.402		349.978	390.8	408.65	748.065
1806	5.2619	194	231.873	390.582		350.14	390.915	408.825	748.375
1807	5.26343	193	231.989	390.748		350.343	391.08	409	748.724
1808	5.26497	192	232.107	390.913		350.497	391.228	409.175	749.072
1809	5.2665	191	232.25	391.123		350.693	391.426	409.35	749.452
1810	5.26803	190	232.37	391.348		350.889	391.641	409.65	749.653
1811	5.26956	189	232.45	391.483		351.015	391.8	409.825	749.885
1812	5.27109	188	232.601	391.692		351.211	391.971	410	750.039
1813	5.27261	187	232.745	391.933		351.435	392.268	410.275	750.233
1814	5.27414	186	232.889	392.127		351.589	392.433	410.475	750.619
1815	5.27567	185	233.024	392.368		351.757	392.647	410.7	750.928
1816	5.27719	184	233.15	392.592		351.981	392.895	410.9	751.199
1817	5.27872	183	233.294	392.757		352.107	393.053	411.075	751.546
1818	5.28024	182	233.393	392.952		352.261	393.25	411.25	751.855
1819	5.28177	181	233.511	393.103		352.429	393.423	411.425	752.087
1820	5.28329	180	233.663	393.238		352.597	393.555	411.75	752.395
1821	5.28481	179	233.762	393.433		352.737	393.753	411.85	752.665
1822	5.28634	178	233.862	393.641		352.919	393.934	412.025	752.858
1823	5.28786	177	233.97	393.72		353.059	394.05	412.2	753.359
1824	5.28938	176	234.123	393.897		353.185	394.198	412.375	753.629
1825	5.2909	175	234.231	394.077		353.325	394.363	412.525	753.86
1826	5.29242	174	234.321	394.228		353.521	394.561	412.725	754.13
1827	5.29393	173	234.419	394.4		353.661	394.693	412.9	754.476
1828	5.29545	172	234.546	394.54		353.815	394.858	413.125	754.938
1829	5.29697	171	234.672	394.668		353.95	395	413.325	755.284
1830	5.29848	170	234.825	394.803		354.095	395.139	413.5	755.592
1831	5.3	169	234.941	394.998		354.305	395.32	413.675	755.938
1832	5.30151	168	235.041	395.178		354.529	395.485	413.95	756.246
1833	5.30303	167	235.202	395.373		354.711	395.733	414.15	756.514
1834	5.30454	166	235.364	395.582		354.879	395.964	414.375	756.86
1835	5.30606	165	235.45	395.777		355.019	396.096	414.575	757.167
1836	5.30757	164	235.536	395.973		355.187	396.294	414.75	757.666
1837	5.30908	163	235.671	396.152		355.369	396.492	414.925	757.973
1838	5.31059	162	235.805	396.317		355.551	396.657	415.1	758.357
1839	5.3121	161	235.913	396.498		355.691	396.822	415.375	758.625
1840	5.31361	160	236.066	396.663		355.873	396.987	415.55	759.123
1841	5.31512	159	236.21	396.873		356.027	397.168	415.825	759.429
1842	5.31662	158	236.327	397.098		356.167	397.465	416	759.736
1843	5.31813	157	236.471	397.293		356.391	397.647	416.2	759.966
1844	5.31964	156	236.589	397.473		356.559	397.812	416.35	760.425
1845	5.32114	155	236.714	397.668		356.727	397.993	416.55	760.731
1846	5.32265	154	236.84	397.848		356.895	398.175	416.825	761.037
1847	5.32415	153	236.948	398.058		357.049	398.373	416.975	761.266
1848	5.32566	152	237.065	398.252		357.231	398.554	417.225	761.572
1849	5.32716	151	237.227	398.433		357.385	398.719	417.4	761.725
1850	5.32866	150	237.363	398.627		357.609	398.95	417.6	762.107
1851	5.33017	149	237.47	398.837		357.819	399.181	417.775	762.45
1852	5.33167	148	237.637	399.033		357.987	399.346	418.05	762.679
1853	5.33317	147	237.758	399.243		358.197	399.561	418.25	762.908
1854	5.33467	146	237.893	399.438		358.365	399.759	418.425	763.404
1855	5.33617	145	238.011	399.647		358.561	399.94	418.625	763.786
1856	5.33766	144	238.127	399.827		358.701	400.122	418.825	764.129
1857	5.33916	143	238.244	400.007		358.911	400.32	419.025	764.472
1858	5.34066	142	238.352	400.188		359.065	400.518	419.175	764.662
1859	5.34215	141	238.46	400.382		359.205	400.666	419.325	764.967
1860	5.34365	140	238.56	400.608		359.373	400.897	419.525	765.309
1861	5.34515	139	238.703	400.788		359.555	401.079	419.7	765.614
1862	5.34664	138	238.811	400.952		359.695	401.227	419.925	765.918
1863	5.34813	137	238.919	401.118		359.863	401.392	420.1	766.146
1864	5.34963	136	239.054	401.327		360.017	401.607	420.3	766.451
1865	5.35112	135	239.144	401.538		360.157	401.805	420.45	766.755
1866	5.35261	134	239.306	401.733		360.339	402.036	420.65	767.059
1867	5.3541	133	239.415	401.942		360.563	402.234	420.825	767.401
1868	5.35559	132	239.513	402.108		360.689	402.415	421.05	767.78
1869	5.35708	131	239.621	402.303		360.843	402.58	421.25	768.008
1870	5.35857	130	239.748	402.483		361.011	402.762	421.425	768.236
1871	5.36006	129	239.856	402.692		361.207	402.943	421.6	768.653
1872	5.36155	128	239.954	402.902		361.375	403.158	421.775	768.957
1873	5.36303	127	240.099	403.067		361.557	403.372	421.95	769.26
1874	5.36452	126	240.207	403.262		361.725	403.57	422.125	769.525
1875	5.36601	125	240.287	403.428		361.851	403.735	422.3	769.753
1876	5.36749	124	240.395	403.608		361.963	403.9	422.475	770.169
1877	5.36898	123	240.522	403.788		362.159	404.098	422.65	770.321
1878	5.37046	122	240.648	403.983		362.355	404.28	422.85	770.661
1879	5.37194	121	240.738	404.147		362.481	404.412	423.05	770.889
1880	5.37343	120	240.881	404.327		362.635	404.577	423.25	771.191
1881	5.37491	119	240.971	404.538		362.845	404.775	423.475	771.645
1882	5.37639	118	241.097	404.733		363.013	405.072	423.675	771.948
1883	5.37787	117	241.206	404.897		363.181	405.22	423.85	772.212
1884	5.37935	116	241.304	405.092		363.321	405.402	424.025	772.552
1885	5.38083	115	241.404	405.257		363.475	405.567	424.175	772.817
1886	5.38231	114	241.502	405.452		363.643	405.748	424.35	773.119
1887	5.38378	113	241.629	405.647		363.811	405.963	424.525	773.496
1888	5.38526	112	241.737	405.873		364.021	406.177	424.7	773.836
1889	5.38674	111	241.845	406.082		364.175	406.392	424.85	774.137
1890	5.38821	110	241.952	406.308		364.329	406.59	425.05	774.401
1891	5.38969	109	242.07	406.488		364.525	406.791	425.3	774.778
1892	5.39116	108	242.186	406.683		364.749	406.942	425.5	775.004
1893	5.39264	107	242.339	406.892		364.931	407.068	425.675	775.306
1894	5.39411	106	242.483	407.043		365.113	407.299	425.9	775.645
1895	5.39559	105	242.619	407.267		365.309	407.514	426.125	775.984
1896	5.39706	104	242.761	407.493		365.457	407.745	426.325	776.36
1897	5.39853	103	242.888	407.688		365.687	407.959	426.525	776.548
1898	5.4	102	242.99	407.837		365.813	408.091	426.725	776.999
1899	5.40147	101	243.077	408.033		365.953	408.289	426.9	777.225
1900	5.40294	100	243.183	408.212		366.107	408.487	427.05	777.375
1901	5.40441	99	243.28	408.392		366.289	408.685	427.225	777.751
1902	5.40588	98	243.4	408.572		366.457	408.85	427.425	778.089
1903	5.40735	97	243.528	408.812		366.667	409.098	427.7	778.352
1904	5.40881	96	243.654	408.993		366.835	409.312	427.9	778.652
1905	5.41028	95	243.77	409.188		366.989	409.477	428.1	778.84
1906	5.41174	94	243.879	409.368		367.143	409.659	428.3	779.14
1907	5.41321	93	243.995	409.502		367.311	409.807	428.475	779.478
1908	5.41467	92	244.05	409.652		367.465	409.972	428.65	779.74
1909	5.41614	91	244.167	409.832		367.633	410.17	428.825	779.965
1910	5.4176	90	244.274	410.058		367.787	410.401	429.025	780.265
1911	5.41906	89	244.364	410.267		367.969	410.665	429.225	780.527
1912	5.42053	88	244.446	410.402		368.109	410.873	429.4	780.864
1913	5.42199	87	244.526	410.598		368.305		429.625	781.164
1914	5.42345	86	244.653	410.808		368.515		429.825	781.426
1915	5.42491	85	244.797	410.959		368.739		430	781.613
1916	5.42637	84	244.905	411.123		368.893		430.2	781.875
1917	5.42783	83	245.004	411.317		369.075		430.375	782.193
1918	5.42929	82	245.13	411.483		369.215		430.575	782.548
1919	5.43074	81	245.21	411.678		369.411		430.75	782.81
1920	5.4322	80	245.337	411.873		369.579		430.95	783.108
1921	5.43366	79	245.445	412.053		369.747		431.175	783.333
1922	5.43511	78	245.525	412.248		369.957		431.35	783.631
1923	5.43657	77	245.625	412.488		370.125		431.525	784.005
1924	5.43802	76	245.724	412.697		370.307		431.7	784.34
1925	5.43948	75	245.814	412.908		370.461		432	784.564
1926	5.44093	74	245.966	413.072		370.657		432.2	784.9
1927	5.44238	73	246.075	413.283		370.853		432.475	785.198
1928	5.44384	72	246.201	413.522		371.049		432.65	785.534
1929	5.44529	71	246.299	413.762		371.259		432.925	785.832
1930	5.44674	70	246.452	413.973		371.469		433.125	786.241
1931	5.44819	69	246.56	414.197		371.651		433.375	786.539
1932	5.44964	68	246.66	414.408		371.805		433.55	786.837
1933	5.45109	67	246.776	414.572		372.043		433.725	787.097
1934	5.45254	66	246.885	414.812		372.225		433.9	787.432
1935	5.45398	65	246.975	414.993		372.379		434.075	787.618
1936	5.45543	64	247.047	415.188		372.575		434.225	788.175
1937	5.45688	63	247.155	415.337		372.771		434.425	788.398
1938	5.45832	62	247.272	415.502		372.939		434.65	788.695
1939	5.45977	61	247.362	415.652		373.065		434.825	788.955
1940	5.46121	60	247.47	415.826		373.219		435	789.327
1941	5.46266	59	247.595	416		373.331		435.2	789.586
1942	5.4641	58	247.65	416.168		373.485		435.4	789.883
1943	5.46554	57	247.757	416.418		373.597		435.625	790.254
1944	5.46699	56	247.865	416.582		373.765		435.825	790.587
1945	5.46843	55	247.964	416.762		373.933		436	790.884
1946	5.46987	54	248.072	416.913		374.073		436.175	791.18
1947	5.47131	53	248.208	417.152		374.255		436.375	791.439
1948	5.47275	52	248.293	417.332		374.451		436.6	791.847
1949	5.47419	51	248.397	417.572		374.619		436.775	792.106
1950	5.47563	50	248.513	417.723		374.815		436.975	792.365
1951	5.47707	49	248.6	417.887		374.997		437.175	792.661
1952	5.47851	48	248.685	418.067		375.179		437.375	792.993
1953	5.47994	47	248.82	418.277		375.389		437.6	793.4
1954	5.48138	46	248.928	418.473		375.571		437.8	793.621
1955	5.48281	45	249.018	418.608		375.697		437.95	793.843
1956	5.48425	44	249.1	418.728		375.837		438.15	794.175
1957	5.48569	43	249.197	418.952		375.991		438.375	794.545
1958	5.48712	42	249.305	419.118		376.173		438.575	794.803
1959	5.48855	41	249.423	419.267		376.355		438.8	795.135
1960	5.48999	40	249.548	419.447		376.523		439.025	795.504
1961	5.49142	39	249.65	419.582		376.705		439.225	795.909
1962	5.49285	38	249.75	419.7		376.859		439.375	796.167
1963	5.49428	37	249.845	419.983		377.013		439.675	796.646
1964	5.49571	36	249.95	420.118		377.223		439.875	796.94
1965	5.49714	35	250.056	420.358		377.419		440.125	797.492
1966	5.49857	34	250.163	420.522		377.573		440.3	797.933
1967	5.5	33	250.302	420.717		377.741		440.5	798.191
1968	5.50143	32	250.405	420.882		377.881		440.675	798.485
1969	5.50286	31	250.525	421.062		378.035		440.925	798.742
1970	5.50428	30	250.646	421.257		378.175		441.1	799.073
1971	5.50571	29	250.73	421.408		378.315		441.3	799.33
1972	5.50714	28	250.842	421.558		378.511		441.55	799.587
1973	5.50856	27	250.963	421.707		378.665		441.725	799.843
1974	5.50999	26	251.046	421.902		378.847		441.925	800.027
1975	5.51141	25	251.167	422.082		379.015		442.125	800.247
1976	5.51283	24	251.26	422.277		379.211		442.35	800.54
1977	5.51426	23	251.381	422.382		379.365		442.525	800.944
1978	5.51568	22	251.493	422.517		379.519		442.7	801.31
1979	5.5171	21	251.595	422.697		379.673		442.9	801.75
1980	5.51852	20	251.669	422.892		379.869		443.1	802.006
1981	5.51994	19	251.79	423.087		380.037		443.3	802.152
1982	5.52136	18	251.911	423.298		380.191		443.475	802.445
1983	5.52278	17	252.023	423.507		380.415		443.65	802.774
1984	5.5242	16	252.162	423.717		380.597		443.875	803.03
1985	5.52562	15	252.274	423.882		380.807		444.075	803.323
1986	5.52704	14	252.376	424.108		380.975		444.3	803.652
1987	5.52846	13	252.469	424.272		381.129		444.475	803.871
1988	5.52987	12	252.562	424.483		381.297		444.65	804.2
1989	5.53129	11	252.692	424.632		381.493		444.85	804.492
1990	5.5327	10	252.767	424.798		381.647		445.025	804.93
1991	5.53412	9	252.878	425.007		381.871		445.275	805.185
1992	5.53553	8	252.999	425.217		382.067		445.475	805.623
1993	5.53695	7	253.12	425.442		382.319		445.675	805.842
1994	5.53836	6	253.232	425.623		382.473		445.85	806.133
1995	5.53977	5	253.334	425.788		382.655		446.075	806.315
1996	5.54119	4	253.464	425.998		382.823		446.25	806.68
1997	5.5426	3	253.585	426.147		382.977		446.475	806.935
1998	5.54401	2	253.706	426.387		383.201		446.675	807.262
[truncated: 1,837 more rows]

## Sheet: 3) Tie-points
GICC21 Matchpoints							EastGRIP		NEEM		NorthGRIP1		NorthGRIP2		NEEM-2011-S1		GRIP		DYE-3		DYE-3 4B		DYE-3 18C
N	Match Type	Average Age [year b2k]	std. dev. [years]	Average age [year CE/BCE]	δt [years]	Name + ref. (if known)	Depth, m	Age, years b2k	Depth, m	Age, years b2k	Depth, m	Age, years b2k	Depth, m	Age, years b2k	Depth, m	Age, years b2k	Depth, m	Age, years b2k	Depth, m	Age, years b2k	Depth, m	Age, years b2k	Depth, m	Age, years b2k
	Ammonium	38.3818	0.056057	1961	2		14.922	38.3625	19.839	38.286	13.735	38.4828	14.1		20.801	38.3583	13.003	38.3825	18.503	38.415	20.742	38.3667	18.469	38.401
	Ammonium	49.3484	0.102601	1950	2		17.154	49.2232	23.419	49.405	17.199	49.4467	17.61		24.331	49.503	17.342	49.312	28.031	49.3269	29.896	49.3608	25.904	49.2095
1	Volcanic	73.6085	0.158918	1926	2		21.349	73.8173	31.277	73.6272	24.448	73.388	25.15		32.004	73.7	26.359	73.8114	48.039	73.474	48.637	73.4888	41.564	73.5611
2	Volcanic	87.4453	0.0774289	1912	2	Katmai (Coulter et al., 2012: NGRIP)	23.703	87.4728	35.368	87.4619	28.175	87.5455	28.46		36.052	87.4233	30.646	87.3491	57.553	87.3186	57.856	87.5	49.351	87.4914
	Ammonium	104.58	0.151385	1895	2		26.48	104.583	40.108	104.639	32.727	104.673	32.95		40.808	104.797	36.097	104.407	68.772	104.686	68.738	104.504	58.524	104.347
	Ammonium	110.244	0.0479703	1889	2		27.506	110.26	41.844	110.222	34.267	110.288	34.529		42.499	110.313	37.898	110.243	72.013	110.265	71.867	110.195	61.252	110.168
	Ammonium	113.328	0.0796314	1886	2		28.023	113.495	42.794	113.356	35.177	113.305	35.48		43.419	113.38	38.927	113.28	73.783	113.272	73.706	113.264	62.82	113.275
	Ammonium	162.574	0.203593	1837	2		36.555	162.736	56.239	162.771	47.607	162.598	47.853		56.837	162.807	53.107	162.571	100.271	162.363	100.055	162.525	85.366	162.223
3	Volcanic	167.631	0.083951	1832	2		37.453	167.622	57.362	167.64	48.771	167.7	49.04		57.903	167.767	54.399	167.633	102.687	167.573	102.532	167.48	87.582	167.631
	Ammonium	177.256	0.138541	1822	2		39.226	177.383	59.804	177.251	51.068	177.346	51.3		60.34	177.315	57.067	177.062	108.324	177.107	108.216	177.141	92.396	177.44
4	Volcanic	183.512	0.0900948	1816	2	Tambora? (Cole-Dai et al., 2009)	40.242	183.539	61.163	183.567	52.438	183.489	52.66		61.791	183.7	58.685	183.44	111.74	183.421	111.697	183.456	95.302	183.485
	Ammonium	192.432	0.0892569	1807	2		41.7	192.339	63.383	192.375	54.507	192.414	54.66		63.947	192.37	61.048	192.447	116.515	192.612	116.599	192.39	99.372	192.506
	Ammonium	195.386	0.151867	1804	2		42.168	195.35	64.346	195.578	55.216	195.459	55.33		64.907	195.552	61.855	195.473	117.733	195.249	117.926	195.266	100.564	195.163
	Ammonium	199.565	0.0702682	1800	2		42.857	199.516	65.441	199.571	56.252	199.696	56.272		65.93	199.646	62.981	199.524	119.888	199.519	120.039	199.55	102.411	199.498
	Ammonium	206.536	0.131394	1793	2		43.997	206.549	67.109	206.709	57.821	206.528	58.02		67.668	206.637	64.752	206.28	123.38	206.543	123.713	206.437	105.686	206.606
	Ammonium	207.343	0.177198	1792	2		44.1	207.214	67.308	207.536	57.985	207.34	58.219		67.913	207.585	64.988	207.169	123.887	207.512	124.119	207.237	105.921	207.15
	Ammonium	210.638	0.190718	1789	2		44.528	210.341	68.058	210.669	58.69	210.415	58.7		68.615	210.519	65.804	210.796	125.599	210.779	125.965	210.731	107.531	210.857
5	Volcanic	216.515	0.172284	1783	2	Laki (Fiacco et al. 1994: GISP2 tephra)	45.456	216.578	69.693	216.802	60.108	216.565	60.31		70.208	216.641	67.4	216.5	128.781	216.449	129.135	216.289	110.214	216.297
	Ammonium	228.391	0.10863	1771	2		47.052	228.42	72.424	228.3	62.633	228.545	62.81		73.007	228.507	70.407	228.389	134.059	228.335	134.674	228.244
6	Volcanic	237.526	0.0692884	1762	2		48.15	237.473	74.9	237.539	64.55	237.464	64.73		75.4	237.548	72.653	237.458	138.384	237.546	139.33	237.654
7	Volcanic	244.293	0.0949275	1755	2		48.947	244.339	76.4	244.294	65.997	244.443	66.22		76.95	244.167	74.3	244.222	142	244.228	142.977	244.357
	Ammonium	267.515	0.09945	1732	2		51.913	267.619	81.783	267.605	70.933	267.513	71.254		82.333	267.548	80.314	267.324	153.053	267.533	154.368	267.466
	Ammonium	280.674	0.407389	1719	2		53.603	281.587	84.747	280.636	73.631	280.475	73.942		85.255	280.556	83.614	280.456	159.14	280.49	160.746	280.515
	Ammonium	297.554	0.15788	1702	2		55.586	297.77	88.381	297.7	77.053	297.6	77.392		88.857	297.489	87.591	297.464	166.893	297.563	168.797	297.295
	Ammonium	316.453	0.137745	1683	2		57.949	316.452	92.583	316.253	80.925	316.625	81.04		93.07	316.479	92.141	316.564	175.127	316.343
8	Volcanic	332.128	0.154703	1667	2	Tarumae? (Zielinski et al., 1994)	59.908	332.294	96.25	332.211	84.172	332.1	84.31		96.7	332.139	95.916	332.182	182.12	331.842
9	Volcanic	353.272	0.425413	1646	2		62.512	353.434	100.886	353.41	88.267	353.484	88.43		101.291	353.387	100.978	353.51	192.189	352.409
10	Volcanic	358.265	0.475563	1641	2		63.066	358.258	101.991	358.604	89.244	358.393	89.46		102.419	358.638	102.196	358.355	194.484	357.342
11	Volcanic	362.507	0.404647	1637	2		63.672	362.804	102.966	362.749	90.044	362.405	90.18		103.416	362.712	103.144	362.64	196.913	361.732
	Ammonium	363.495	0.390693	1636	2		63.763	363.607	103.154	363.626	90.28	363.7	90.294		103.628	363.681	103.356	363.655	197.266	362.701
	Ammonium	376.179	0.39924	1623	2		65.25	376.236	105.85	376.222	92.7	376.325	92.86		106.348	376.554	106.1	376.333	203.396	375.401
	Ammonium	380.341	0.488156	1619	2		65.796	380.669	106.764	380.531	93.519	380.448	93.595		107.214	380.614	107.069	380.418	205.192	379.363
	Ammonium	389.507	0.0827728	1610	2		66.838	389.609	108.831	389.532	95.354	389.468	95.526		109.233	389.433	109.132	389.41	209.698	389.59
12	Volcanic	397.568	0.531849	1602	2		67.711	397.815	110.658	397.811	96.922	397.649	97.06		111.063	397.767	110.928	397.874	212.771	396.494
	Ammonium	405.582	0.109293	1594	2		68.638	405.583	112.453	405.559	98.487	405.771	98.722		112.891	405.615	112.673	405.447	216.916	405.518
	Ammonium	414.347	0.457717	1585	2		69.838	414.505	114.465	414.656	100.345	414.6	100.48		114.911	414.541	114.835	414.34	220.783	413.438
13	Volcanic	432.105	0.288364	1567	2		71.956	432.206	118.297	432.177	103.753	432.165	103.91		118.731	432.367	118.886	432.18	229.326	431.537
	Ammonium	458.301	0.415646	1541	2		75.126	458.51	123.966	458.515	108.778	458.595	108.908		124.398	458.443	124.727	458.257	241.745	457.485
	Ammonium	462.243	0.443047	1537	2		75.646	462.508	124.798	462.447	109.479	462.442	109.606		125.215	462.476	125.6	462.222	244.087	461.363
14	Volcanic	487.195	0.476251	1512	2		78.595	487.353	130.082	487.164	114.293	487.613	114.35		130.532	487.51	131.206	487.249	256.408	486.283
	Ammonium	500.28	0.48328	1499	2		80.262	500.637	132.966	500.602	116.735	500.348	116.91		133.372	500.529	134.31	500.218	262.636	499.349
15	Volcanic	522.586	0.459668	1477	2	Veiðivötn-Bárðarbunga (Abbot et al., 2020: TUNU13)	82.915	522.716	137.355	522.819	120.932	522.806	121.07		137.766	522.783	139.391	522.738	273.068	521.651
16	Volcanic	539.973	0.425144	1460	2		85.003	540.146	140.923	540.167	124.116	540.129	124.28		141.385	540.133	143.16	540.156	280.815	539.105
17	Volcanic	546.411	0.435119	1453	2		85.748	546.343	142.589	546.521	125.45	546.825	125.61		143.016	546.45	144.614	546.729	283.63	545.601
	Ammonium	547.303	0.448158	1452	2		85.914	547.483	142.781	547.386	125.618	547.578	125.8		143.256	547.522	144.776	547.449	284.017	546.398
	Ammonium	567.2	0.493719	1432	2		88.437	567.42	147.175	567.321	129.43	567.469	129.56		147.611	567.483	149.3	567.3	293.332	566.204
	Ammonium	586.376	0.506299	1413	2		91.003	586.51	151.398	586.565	133.234	586.595	133.37		151.87	586.729	153.8	586.5	302.642	585.356
	Ammonium	604.26	0.52098	1395	2		93.172	604.457	155.073	604.473	136.559	604.609	136.72		155.492	604.507	158	604.3	311.866	603.217
	Ammonium	616.338	0.442635	1383	2		94.605	616.734	157.503	616.403	138.775	616.6	138.94		157.954	616.539	160.7	616.25	318.03	615.5
	Ammonium	630.384	0.370321	1369	2		96.169	630.235	160.495	630.346	141.427	630.661	141.57		160.957	630.495	163.757	630.809	323.994	629.757
18	Volcanic	637.176	0.464346	1362	2	Öræfajökull? (Coulter et al., 2012)	96.953	637.521	161.864	637.384	142.719	637.522	142.9		162.261	637.163	165.061	637.18	326.735	636.284
	Ammonium	649.207	0.434344	1350	2		98.357	649.528	164.3	649.298	144.88	649.306	145.04		164.813	649.511	167.686	649.244	331.706	648.353
	Ammonium	651.228	0.375125	1348	2		98.519	651.272	164.703	651.269	145.3	651.543	145.3		165.212	651.454	168.151	651.338	332.606	650.495
19	Volcanic	654.166	0.326235	1345	2		98.844	654.203	165.339	654.11	145.909	654.47	146.1		165.792	654.269	168.872	654.388	334.095	653.553
	Ammonium	657.264	0.557149	1342	2		99.257	657.528	166.032	657.664	146.42	657.367	146.58		166.449	657.525	169.528	657.347	335.181	656.152
20	Volcanic	658.457	0.409977	1341	2		99.36	658.647	166.25	658.782	146.643	658.64	146.86		166.657	658.615	169.745	658.4	336.09	657.659
	Ammonium	667.225	0.405723	1332	2		100.276	667.517	168.019	667.293	148.323	667.54	148.51		168.47	667.376	171.665	667.178	339.909	666.444
	Ammonium	691.255	0.564934	1308	2		102.676	691.258	172.593	691.431	152.597	691.456	152.74		173.047	691.358	176.97	691.85	349.863	690.178
	Ammonium	711.255	0.497202	1288	2		104.769	711.261	176.632	711.45	156.087	711.48	156.27		177.12	711.625	181.014	711.445	358.422	710.268
21	Volcanic	713.085	0.267185	1286	2		104.947	713.09	177.029	713.222	156.369	713.082	156.55		177.456	713.124	181.404	713.395	359.214	712.594
	Ammonium	715.324	0.387449	1284	2		105.215	715.618	177.556	715.431	156.821	715.35	157		177.981	715.549	181.863	715.44	359.92	714.557
	Ammonium	719.319	0.3252	1280	2		105.62	719.66	178.5	719.421	157.563	719.24	157.79		178.974	719.443	182.684	719.436	361.594	718.714
	Ammonium	723.069	0.332466	1276	2		105.991	723.193	179.315	723.226	158.316	723.34	158.55		179.742	723.108	183.477	723.135	363.205	722.411
22	Volcanic	741	0.348661	1257	2	Samalas (Palais et al., 1992: GISP2)	107.923	741.183	182.946	741.095	161.514	741.1	161.73	741.105	183.33	741.101	187.381	741.204	369.954	740.216
	Ammonium	750.312	0.426953	1249	2.28831		108.948	750.517	184.907	750.569	163.309	750.587	163.45	750.373	185.38	750.557	189.386	750.18	373.384	749.402
	Ammonium	759.253	0.425527	1240	2.41536		109.915	759.474	186.829	759.241	164.972	759.535	165.11	759.474	187.247	759.375	191.346	759.355	377.127	758.313
23	Volcanic	768.422	0.51399	1231	2.51402		110.889	768.492	188.885	768.744	166.579	768.65	166.78	768.767	189.085	768.581	193.3	768.429	380.718	767.291
	Ammonium	787.365	0.503865	1212	2.67354		113.007	787.694	192.965	787.611	170.184	787.445	170.4	787.666	193.403	787.614	197.3	787.25	388.652	786.278
	Ammonium	788.456	0.392908	1211	2.68159		113.144	788.684	193.166	788.631	170.392	788.462	170.61	788.656	193.592	788.672	197.6	788.5	389.2	787.587
24	Volcanic	817.188	0.367695	1182	2.86711		116.289	817.363	199.122	817.331	175.591	817.212	175.79	817.414	199.563	817.357	203.705	817.275	400.036	816.368
25	Volcanic	827.612	0.529723	1172	2.92527		117.557	827.885	201.179	827.685	177.579	827.856	177.74	827.906	201.659	827.795	205.972	827.735	403.806	826.425
	Ammonium	843.189	0.445855	1156	3.00593		119.288	843.356	204.21	843.504	180.272	843.218	180.47	843.388	204.709	843.437	209.317	843.21	410.23	842.208
	Ammonium	869.282	0.373906	1130	3.12819		122.242	869.427	209.652	869.507	185.14	869.417	185.31	869.494	210.097	869.395	215.003	869.284	420.174	868.451
26	Volcanic	871.353	0.392636	1128	3.13733		122.45	871.412	210.102	871.419	185.519	871.427	185.71	871.594	210.616	871.72	215.453	871.39	421.052	870.506
	Ammonium	872.218	0.470413	1127	3.14113		122.583	872.644	210.353	872.356	185.71	872.283	185.86	872.367	210.813	872.484	215.618	872.191	421.396	871.203
27	Volcanic	890.105	0.393191	1109	3.21698		124.377	890.096	214.021	890.133	189.11	890.452	189.12	890.115	214.525	890.425	219.584	890.235	428.013	889.276
	Ammonium	894.231	0.426707	1105	3.23382		124.842	894.266	214.88	894.492	189.83	894.289	189.994	894.47	215.464	894.693	220.428	894.015	429.65	893.393
	Ammonium	913.374	0.479439	1086	3.3091		127.068	913.62	219.182	913.525	193.49	913.469	193.644	913.622	219.553	913.676	224.544	913.394	437.069	912.309
	Ammonium	923.385	0.392227	1076	3.34679		128.12	923.639	220.952	923.408	195.146	923.541	195.25	923.565	221.384	923.458	226.54	923.575	441.048	922.513
	Ammonium	958.385	0.316325	1041	3.471		132.3	958.639	228	958.411	201.4	958.559	201.5	958.531	228.374	958.503	234.153	958.353	454.976	957.7
	Ammonium	968.289	0.35367	1031	3.50429		133.48	968.438	230.127	968.399	203.15	968.567	203.3	968.506	230.25	968.34	236.2	968.25	459.036	967.522
28	Volcanic	970.183	0.282699	1029	3.51057		133.679	970.201	230.43	970.2	203.451	970.265	203.62	970.468	230.547	970.145	236.631	970.405	459.894	969.6
	Ammonium	977.266	0.439401	1022	3.53384		134.595	977.399	231.65	977.453	204.699	977.42	204.83	977.523	231.928	977.341	238.201	977.449	462.214	976.278
	Ammonium	978.379	0.314611	1021	3.53746		134.709	978.466	231.82	978.569	204.871	978.329	205.01	978.589	232.162	978.511	238.424	978.495	462.854	977.691
	Ammonium	989.397	0.415753	1010	3.57289		135.981	989.71	233.898	989.697	206.816	989.479	206.93	989.433	234.212	989.624	240.607	989.326	466.916	988.511
	Ammonium	1001.46	0.486275	998	3.61078		137.279	1001.73	236.409	1001.6	209.022	1001.65	209.13	1001.53	236.714	1001.73	243.095	1001.62	471.244	1000.37
	Ammonium	1007.28	0.35355	992	3.62873		137.911	1007.4	237.7	1007.53	210.075	1007.37	210.2	1007.42	238	1007.37	244.3	1007.38	473.7	1006.49
	Ammonium	1012.44	0.368245	987	3.64452		138.59	1012.72	238.646	1012.49	211.039	1012.46	211.23	1012.86	239.02	1012.58	245.395	1012.26	475.87	1011.73
	Ammonium	1020.22	0.357594	979	3.66801		139.536	1020.27	240.3	1020.55	212.514	1020.54	212.57	1020.35	240.581	1020.24	247.2	1020.14	479.004	1019.49
	Ammonium	1021.31	0.462027	978	3.67127		139.657	1021.59	240.45	1021.32	212.7	1021.57	212.74	1021.37	240.841	1021.55	247.45	1021.5	479.231	1020.29
	Ammonium	1022.43	0.549179	977	3.6746		139.764	1022.54	240.7	1022.6	212.889	1022.67	213.02	1022.81	241.061	1022.66	247.677	1022.51	479.566	1021.2
	Ammonium	1039.28	0.269761	960	3.72418		141.65	1039.61	244.223	1039.28	215.947	1039.24	216.07	1039.43	244.521	1039.47	251.558	1039.16	486.297	1038.77
	Ammonium	1043.35	0.342847	956	3.73595		142.163	1043.55	245.004	1043.34	216.742	1043.6	216.82	1043.57	245.343	1043.54	252.47	1043.22	487.708	1042.64
	Ammonium	1046.21	0.372567	953	3.74417		142.485	1046.38	245.643	1046.18	217.245	1046.44	217.35	1046.4	245.966	1046.44	253.195	1046.25	488.76	1045.4
	Unknown	1053.14	0.311501	946	3.7639	Tianchi (Sun et al., 2014)	143.209	1053.21	247.003	1053.37	218.496	1053.19	218.591	1053.19	247.231	1053.19	254.761	1053.35	491.243	1052.45
29	Volcanic	1060.07	0.40518	939	3.78345	Katla, Eldjá (Zielinski et al. 1995: GISP2)	143.95	1060.06	248.3	1060.21	219.724	1060.18	219.82	1060.3	248.711	1060.37	256.2	1060.18	493.851	1059.18
30	Volcanic	1071.24	0.369588	928	3.8145		145.304	1071.39	250.512	1071.33	221.7	1071.34	221.82	1071.43	250.948	1071.52	258.55	1071.25	497.945	1070.42
	Ammonium	1080.41	0.423098	919	3.83959		146.434	1080.49	252.308	1080.59	223.366	1080.71	223.491	1080.58	252.682	1080.6	260.493	1080.41	501.168	1079.47
31	Volcanic	1096.42	0.474783	903	3.88261		148.124	1096.47	255.536	1096.63	226.239	1096.72	226.4	1096.61	255.927	1096.66	263.8	1096.5	506.79	1095.36
	Ammonium	1097.25	0.42401	902	3.88481		148.221	1097.31	255.635	1097.15	226.357	1097.33	226.59	1097.83	256.037	1097.2	264	1097.5	507.207	1096.44
32	Volcanic	1100.51	0.457204	899	3.89345		148.626	1100.65	256.405	1100.77	226.981	1100.72	227.09	1100.73	256.842	1100.72	264.691	1100.52	508.29	1099.49
33	Volcanic	1123.03	0.38484	876	3.95199	Bárðarbunga, Settlement (Iceland) (Grönvold et al 1995; Zielinski et al 1997; Coulter et al., 2012)	151.142	1123.11	260.956	1123.16	231.012	1123.18	231.09	1123.18	261.377	1123.19	269.491	1123.2	516.777	1122.16
	Ammonium	1134.15	0.321833	865	3.98027		152.573	1134.3	263.261	1134.22	232.98	1134.17	233.1	1134.43	263.671	1134.29	271.761	1134.18	520.789	1133.45
	Ammonium	1137.22	0.405274	862	3.98801		152.95	1137.44	263.889	1137.38	233.539	1137.46	233.6	1137.32	264.321	1137.39	272.4	1137.22	521.677	1136.32
34	Volcanic	1177.41	0.392072	822	4.08664		157.399	1177.43	271.553	1177.5	240.645	1177.62	240.8	1177.77	271.938	1177.52	280.838	1177.44	536.199	1176.56
35	Volcanic	1200.51	0.514944	799	4.14129		160.167	1200.64	275.849	1200.78	244.578	1200.74	244.65	1200.77	276.221	1200.84	285.4	1200.43	543.271	1199.38
36	Volcanic	1214.35	0.527014	785	4.17337		161.705	1214.51	278.6	1214.82	247.045	1214.44	247.14	1214.63	278.927	1214.57	288.256	1214.28	548.044	1213.22
	Unknown	1225.35	0.774975	774	4.19853	775 CE SPE (Sigl et al., 2015)	163.08	1225.34	280.858	1225.28	249.124	1225.22	249.259	1225.29	281.496	1226.8	290.683	1225.41	551.908	1224.13
37	Volcanic	1237.2	0.420671	762	4.22531		164.425	1237.32	283.099	1237.34	251.163	1237.34	251.27	1237.46	283.524	1237.46	293.118	1237.21	556.839	1236.27
38	Volcanic	1249.21	0.416443	750	4.25214		165.869	1249.27	285.507	1249.2	253.339	1249.3	253.51	1249.83	285.922	1249.23	295.639	1249.26	560.933	1248.41
	Ammonium	1255.34	0.427028	744	4.26571		166.608	1255.49	286.715	1255.49	254.44	1255.53	254.576	1255.63	287.105	1255.41	296.994	1255.47	563.047	1254.39
	Ammonium	1258.27	0.350021	741	4.27215		167	1258.26	287.278	1258.36	255.026	1258.44	255.18	1258.68	287.7	1258.38	297.55	1258.18	564.182	1257.56
	Ammonium	1288.25	0.369688	711	4.33721		170.6	1288.53	293	1288.23	260.345	1288.33	260.45	1288.5	293.504	1288.55	303.8	1288.12	574.345	1287.5
39	Volcanic	1318.07	0.411676	681	4.40014		174.05	1318.3	298.77	1318.26	265.37	1318.22	265.48	1318.28	299.184	1318.16	309.7	1318.11	584.713	1317.15
	Ammonium	1332.27	0.388887	667	4.42956		175.65	1332.24	301.6	1332.23	267.789	1332.42	268.1	1332.54	302.05	1332.3	312.65	1332.71	589.555	1331.49
	Ammonium	1362.34	0.382359	637	4.49065		179.082	1362.61	307.562	1362.38	273.195	1362.5	273.28	1362.44	307.928	1362.5	318.861	1362.43	600.133	1361.48
40	Volcanic	1367.19	0.408006	632	4.50038		179.65	1367.55	308.488	1367.25	274.036	1367.41	274.1	1367.32	308.847	1367.2	319.878	1367.3	601.842	1366.3
41	Volcanic	1372.34	0.359511	627	4.51067		180.208	1372.54	309.449	1372.62	274.95	1372.43	275.03	1372.47	309.782	1372.43	320.9	1372.38	603.807	1371.55
42	Volcanic	1418.12	0.282705	581	4.60024		185.25	1418.17	318.4	1418.23	282.957	1418.13	283.05	1418.13	318.75	1418.22	330.415	1418.45	619.655	1417.53
43	Volcanic	1425.42	0.360557	574	4.61423		186.062	1425.45	319.77	1425.5	284.279	1425.63	284.4	1425.72	320.208	1425.57	331.887	1425.43	622.31	1424.63
	Ammonium	1435.25	0.471399	564	4.63296		187.17	1435.5	321.6	1435.41	285.983	1435.46	286.08	1435.51	322	1435.43	333.916	1435.2	625.851	1434.2
	Ammonium	1442.25	0.399706	557	4.64623		188.05	1442.49	323.049	1442.41	287.323	1442.34	287.42	1442.42	323.444	1442.54	335.449	1442.19	628.395	1441.38
	Ammonium	1443.15	0.435752	556	4.64792		188.15	1443.26	323.231	1443.23	287.527	1443.26	287.59	1443.27	323.692	1443.55	335.72	1443.27	628.738	1442.19
	Ammonium	1452.29	0.395885	547	4.66513		189.167	1452.66	324.95	1452.38	289.124	1452.35	289.2	1452.46	325.25	1452.37	337.617	1452.38	631.814	1451.43
44	Volcanic	1463.33	0.515489	536	4.68575		190.427	1463.71	326.784	1463.34	290.904	1463.46	291	1463.52	327.238	1463.67	339.8	1463.38	635.098	1462.2
45	Volcanic	1477.08	0.283975	522	4.71123		191.938	1477.23	329.368	1477.21	293.412	1477.18	293.5	1477.12	329.804	1477.21	342.655	1477.15	639.791	1476.44
46	Volcanic	1530.46	0.469175	469	4.80795		198.3	1530.65	339.6	1530.62	303	1530.79	303.05	1530.5	340.001	1530.89	353.8	1530.25	657.884	1529.5
47	Volcanic	1533.4	0.374517	466	4.81319		198.6	1533.42	340.25	1533.53	303.526	1533.67	303.65	1533.62	340.6	1533.42	354.451	1533.58	658.884	1532.58
	Ammonium	1545.37	0.470481	454	4.83438		200	1545.59	342.514	1545.6	305.642	1545.59	305.72	1545.54	342.851	1545.6	356.867	1545.34	662.527	1544.32
48	Volcanic	1565.58	0.405035	434	4.86981		202.262	1565.72	346.194	1565.7	309.034	1565.77	309.13	1565.88	346.556	1565.87	360.803	1565.39	668.841	1564.74
	Ammonium	1571.45	0.406555	428	4.88001		202.95	1571.62	347.255	1571.62	310.005	1571.5	310.116	1571.58	347.63	1571.67	362.057	1571.61	670.857	1570.53
49	Volcanic	1572.59	0.445051	427	4.882		203.072	1572.64	347.5	1572.89	310.193	1572.65	310.33	1572.8	347.832	1572.85	362.265	1572.7	671.27	1571.61
50	Volcanic	1588.29	0.349252	411	4.90911		204.835	1588.55	350.413	1588.34	312.884	1588.39	313	1588.54	350.75	1588.38	365.493	1588.34	677.063	1587.53
51	Volcanic	1606.48	0.429349	393	4.9402		207.071	1606.75	353.865	1606.56	315.95	1606.52	316.06	1606.7	354.216	1606.77	369.3	1606.5	683.368	1605.54
	Ammonium	1619.38	0.440695	380	4.96205		208.577	1619.47	356.401	1619.81	318.299	1619.6	318.374	1619.46	356.651	1619.4	371.955	1619.46	687.781	1618.43
52	Volcanic	1629.38	0.529223	370	4.97889		209.76	1629.31	358.36	1629.53	320.126	1629.65	320.2	1629.65	358.8	1629.84	373.945	1629.42	690.772	1628.24
53	Volcanic	1632.09	0.400941	367	4.98344		210.096	1632.17	358.931	1632.19	320.576	1632.07	320.7	1632.32	359.299	1632.44	374.469	1632.22	691.657	1631.22
	Ammonium	1680.27	0.476893	319	5.06311		215.91	1680.57	367.826	1680.43	328.879	1680.47	329.01	1680.56	367.891	1680.41	384.097	1680.21	708.074	1679.22
	Ammonium	1700.39	0.412343	299	5.09578		218.274	1700.34	371.518	1700.34	332.378	1700.56	332.491	1700.82	371.903	1700.52	388.054	1700.59	714.76	1699.53
	Ammonium	1705.21	0.457377	294	5.10356		218.9	1705.33	372.4	1705.27	333.093	1705.49	333.21	1705.42	372.772	1705.49	388.822	1705.27	716.19	1704.19
54	Volcanic	1709.38	0.333063	290	5.11028		219.4	1709.51	373.286	1709.42	333.787	1709.54	333.9	1709.42	373.656	1709.72	389.65	1709.4	717.635	1708.67
55	Volcanic	1731.51	0.359495	268	5.14565		222.203	1731.74	377.1	1731.52	337.5	1731.62	337.6	1731.56	377.451	1731.67	394.166	1731.74	724.605	1730.72
56	Volcanic	1732.35	0.490562	267	5.14699		222.299	1732.56	377.322	1732.71	337.684	1732.61	337.75	1732.32	377.633	1732.64	394.3	1732.33	724.846	1731.29
	Ammonium	1749.33	0.558539	250	5.17385		224.569	1749.77	380.171	1749.64	340.467	1749.64	340.55	1749.5	380.45	1749.44	397.603	1749.19	730.14	1748.13
	Ammonium	1767.28	0.469573	232	5.20201		226.936	1767.53	383.4	1767.41	343.48	1767.37	343.6	1767.57	383.748	1767.6	401.101	1767.25	736.286	1766.26
	Ammonium	1785.47	0.354924	214	5.23028		229.3	1785.42	386.973	1785.8	346.7	1785.68	346.75	1785.57	387.289	1785.67	404.85	1785.44	741.966	1784.73
	Ammonium	1804.27	0.493038	195	5.25925		231.671	1804.54	390.329	1804.46	349.825		349.9	1804.48	390.719	1804.59	408.521	1804.26	747.64	1803.29
57	Volcanic	1829.12	0.312558	170	5.29715		234.696	1829.16	394.7	1829.24	353.836		353.98	1829.21	395.048	1829.35	413.372	1829.27	755.109	1828.49
58	Volcanic	1837.44	0.388101	162	5.30974		235.75	1837.59	396.245	1837.56	355.336		355.5	1837.72	396.6	1837.66	415	1837.43	757.872	1836.67
	Ammonium	1838.24	0.318442	161	5.31095		235.85	1838.41	396.399	1838.45	355.452		355.6	1838.35	396.7	1838.26	415.2	1838.36	758.205	1837.6
	Ammonium	1864.33	0.438721	135	5.35012		239.112	1864.64	401.389	1864.29	360.98		360.072	1864.39	401.748	1864.71	420.366	1864.44	766.296	1863.49
	Ammonium	1901.37	0.39036	98	5.40496		243.34	1901.5	408.505	1901.62	366.286		366.37	1901.48	408.773	1901.53	427.328	1901.52	777.594	1900.58
59	Volcanic	1910.43	0.546802	89	5.41822	UE 88 (att. Vesuvius 79 CE) (Plunkett et al., 2022)	244.34	1910.73	410.2	1910.68	367.841		367.92	1910.73	410.564	1910.62	429.12	1910.47	780.063	1909.33
	Ammonium	1927.13	0.518438	72	5.44258		246.105	1927.24	413.434	1927.63	370.838		370.93	1927.39			432.498	1927.13	784.98	1926.27
	Ammonium	1952.42	0.346129	47	5.47911		248.774	1952.66	418.192	1952.59	375.245		375.3	1952.58			437.478	1952.46	792.932	1951.82
	Ammonium	1964.31	0.559504	35	5.49616		250.018	1964.64	420.269	1964.63	377.264		377.325	1964.52			439.988	1964.45	796.741	1963.32
	Ammonium	1975.29	0.371415	24	5.51183		251.225	1975.62	422.167	1975.43	379.039		379.12	1975.54			442.165	1975.18	800.181	1974.7
	Ammonium	2026.24	0.414716	-28	5.58363		256.857	2026.55	431.243	2026.44	387.723		387.83	2026.4			452.311	2026.31	815.475	2025.52
60	Volcanic	2032.51	0.576693	-34	5.59237		257.614	2032.88	432.35	2032.79	388.854		388.96	2032.83			453.674	2032.55	817.543	2031.51
61	Volcanic	2041.07	0.54408	-43	5.60426	Okmok (McConnell et al., 2020)	258.6	2041.58	433.85	2041.14	390.235		390.35	2041.29			455.433	2041.19	820.35	2040.15
62	Volcanic	2043.31	0.507221	-45	5.60736		258.869	2043.74	434.271	2043.32	390.633		390.75	2043.62			455.838	2043.39	820.995	2042.45
	Ammonium	2088.23	0.574519	-90	5.6691		264.103	2088.66	442.287	2088.25	398.189		398.28	2088.58			464.496	2088.41	833.898	2087.24
63	Volcanic	2113.23	0.663118	-115	5.70302		267.114	2113.48	446.931	2113.75	402.545		402.57	2113.39			469.393	2113.47	841.497	2112.07
	Ammonium	2128.29	0.561564	-130	5.72329		268.949	2128.59	449.567	2128.49	405.178		405.189	2128.83			472.229	2128.17	845.699	2127.38
64	Volcanic	2138.43	0.577849	-140	5.73689		270.162	2138.7	451.296	2138.71	406.858		406.92	2138.84			474.3	2138.5	848.689	2137.42
	Ammonium	2152.34	0.547322	-154	5.75545		271.882	2152.78	453.664	2152.41	409.045		409.137	2152.64			476.993	2152.47	852.603	2151.39
65	Volcanic	2165.12	0.31752	-167	5.77243		273.313	2165.09	455.858	2165.37	411.139		411.12	2165.29			479.365	2165.27	856.198	2164.58
	Ammonium	2191.38	0.380603	-193	5.80707		276.38	2191.54	460.429	2191.68	415.197		415.289	2191.55			484.195	2191.4	863.104	2190.72
66	Volcanic	2212.24	0.469933	-214	5.83437		278.781	2212.69	464.037	2212.51	418.774		418.6	2212.15			488.013	2212.36	868.585	2211.47
67	Volcanic	2239.03	0.514951	-241	5.86914		281.681	2239.25	468.821	2239.37	423.121		423.1	2239.23			493.063	2239.16	876.4	2238.11
68	Volcanic	2250.13	0.469817	-252	5.88346		282.889	2250.42	470.78	2250.32	424.83		424.83	2250.27			495.187	2250.35	879.697	2249.29
	Ammonium	2267.37	0.431766	-269	5.90559		284.787	2267.62	473.917	2267.55	427.699		427.7	2267.65			498.43	2267.4	884.751	2266.61
	Ammonium	2315.41	0.380738	-317	5.96662		289.916	2315.68	482.21	2315.39	435.43		435.47	2315.72			507.068	2315.47	898.062	2314.77
	Ammonium	2318.16	0.465902	-320	5.97009		290.2	2318.26	482.805	2318.45	435.943		435.9	2318.42			507.65	2318.33	898.763	2317.34
	Ammonium	2330.31	0.488633	-332	5.98536		291.529	2330.75	485.122	2330.55	437.984		437.94	2330.49			509.797	2330.27	901.92	2329.49
69	Volcanic	2351.15	0.54992	-353	6.01142		293.777	2351.37	488.608	2351.55	441.266		441.16	2351.49			513.471	2351.12	907.457	2350.21
	Ammonium	2373.22	0.538396	-375	6.03884		296.215	2373.58	492.466	2373.33	444.996		444.85	2373.54			517.78	2373.4	913.914	2372.28
	Ammonium	2389.4	0.453068	-391	6.05881		298.011	2389.62	495.1	2389.62	447.574		447.4	2389.42			520.8	2389.71	918.2	2388.61
70	Volcanic	2393.15	0.394593	-395	6.06343		298.429	2393.29	495.885	2393.3	448.167		448.1	2393.44			521.4	2393.25	919.158	2392.45
	Ammonium	2409.25	0.579367	-411	6.0832		300.234	2409.58	498.8	2409.68	450.9		450.8	2409.5			524.4	2409.25	923.315	2408.26
71	Volcanic	2413.38	0.471167	-415	6.08825		300.68	2413.42	499.527	2413.72	451.59		451.47	2413.74			525.155	2413.46	924.377	2412.58
	Ammonium	2415.2	0.509325	-417	6.09048		300.888	2415.39	499.8	2415.46	451.907		451.74	2415.47			525.446	2415.41	924.791	2414.29
72	Volcanic	2423.1	0.348046	-425	6.10012		301.652	2423.25	501.045	2423.23	453.055		452.97	2423.39			526.8	2423.14	927.119	2422.5
73	Volcanic	2431.25	0.415858	-433	6.11005		302.55	2431.4	502.388	2431.46	454.312		454.15	2431.28			528.3	2431.57	929.386	2430.53
74	Volcanic	2462.37	0.545609	-464	6.14774		306.16	2462.83	508.093	2462.74	459.554		459.35	2462.58			534.143	2462.22	937.975	2461.49
75	Volcanic	2489.21	0.453363	-491	6.17997		309.041	2489.25	512.738	2489.73	463.67		463.6	2489.38			538.909	2489.23	945.103	2488.49
	Ammonium	2495.37	0.485419	-497	6.18732		309.723	2495.56	513.673	2495.58	464.706		464.593	2495.61			540.017	2495.59	946.666	2494.5
	Ammonium	2508.14	0.521069	-510	6.20255		311.205	2508.39	515.903	2508.39	466.937		466.76	2508.46			542.415	2508.27	950	2507.22
	Ammonium	2532.47	0.652204	-534	6.23139		314	2532.8	520.2	2532.83	470.924		470.8	2532.59			547.05	2532.79	956.895	2531.31
	Ammonium	2538.41	0.376396	-540	6.23841		314.629	2538.66	521.062	2538.38	471.859		471.71	2538.55			548.136	2538.68	958.677	2537.77
76	Volcanic	2545.38	0.58795	-547	6.24662		315.366	2545.77	522.259	2545.58	472.927		472.8	2545.69			549.339	2545.51	960.278	2544.34
	Ammonium	2559.25	0.64441	-561	6.26293		316.846	2559.56	524.706	2559.42	475.09		474.94	2559.64			551.87	2559.54	963.814	2558.11
	Ammonium	2560.29	0.544585	-562	6.26414		316.969	2560.6	524.924	2560.68	475.236		475.1	2560.59			551.98	2560.2	964.225	2559.37
	Ammonium	2562.32	0.471752	-564	6.26652		317.19	2562.58	525.2	2562.69	475.612		475.36	2562.48			552.336	2562.35	964.756	2561.51
77	Volcanic	2568.42	0.453319	-570	6.27367		317.858	2568.67	526.103	2568.67	476.526		476.4	2568.71			553.461	2568.43	966.499	2567.64
	Ammonium	2593.16	0.357197	-595	6.30251		320.58	2593.46	530.411	2593.09	480.506		480.4	2593.44			558.065	2593.23	973.422	2592.59
78	Volcanic	2599.35	0.474082	-601	6.3097		321.28	2599.66	531.351	2599.43	481.441		481.3	2599.63			559.163	2599.5	975.045	2598.52
79	Volcanic	2602.39	0.737794	-604	6.31322		321.641	2602.7	531.936	2602.43	482.017		481.9	2602.88			559.8	2602.83	975.87	2601.11
	Ammonium	2619.37	0.442491	-621	6.33286		323.546	2619.65	534.853	2619.53	484.749		484.44	2619.43			562.659	2619.62	979.992	2618.59
80	Volcanic	2625.41	0.468027	-627	6.33982		324.237	2625.75	535.976	2625.66	485.892		485.56	2625.6			563.687	2625.43	981.415	2624.59
	Ammonium	2626.15	0.555659	-628	6.34068		324.331	2626.55	536.1	2626.35	486.038		485.7	2626.4			563.857	2626.28	981.584	2625.17
	Ammonium	2627.07	0.479873	-629	6.34174		324.416	2627.31	536.309	2627.47	486.188		485.82	2627.19			564.024	2627.14	981.927	2626.24
	Ammonium	2630.33	0.504304	-632	6.34549		324.8	2630.78	536.8	2630.54	486.71		486.35	2630.41			564.631	2630.46	982.75	2629.47
	Ammonium	2631.22	0.578145	-633	6.34652		324.9	2631.73	536.947	2631.47	486.81		486.5	2631.25			564.8	2631.43	982.983	2630.23
	Ammonium	2642.17	0.438826	-644	6.35909		326.073	2642.21	538.647	2642.47	488.527		488.25	2642.46			566.801	2642.29	986.116	2641.41
	Ammonium	2644.15	0.361669	-646	6.36136		326.3	2644.23	538.945	2644.32	488.844		488.58	2644.42			567.165	2644.26	986.743	2643.52
81	Volcanic	2656.2	0.434883	-658	6.37515		327.65	2656.33	541	2656.49	490.674		490.52	2656.43			569.37	2656.3	989.944	2655.43
82	Volcanic	2672.26	0.405404	-674	6.39347		329.539	2672.48	543.644	2672.55	493.204		493.07	2672.34			572.3	2672.38	994.035	2671.55
	Ammonium	2690.18	0.46016	-692	6.41382		331.59	2690.4	546.652	2690.38	496.019		495.9	2690.49			575.514	2690.26	999.094	2689.37
83	Volcanic	2698.21	0.619251	-700	6.42291		332.394	2698.31	547.918	2698.63	497.212		497.03	2698.52			576.897	2698.48	1001.09	2697.12
	Ammonium	2750.19	0.337795	-752	6.48128		338.041	2750.28	556.557	2750.23	505.338		505.27	2750.38			586.204	2750.45	1014.89	2749.61
84	Volcanic	2755.28	0.477448	-757	6.48696		338.635	2755.33	557.558	2755.78	506.202		506.11	2755.52			587.095	2755.26	1016.03	2754.51
85	Volcanic	2777.48	0.56944	-779	6.51163		341.166	2777.76	561.157	2777.82	509.853		509.64	2777.82			590.956	2777.54	1021.47	2776.48
	Ammonium	2796.34	0.368702	-798	6.53248		343.255	2796.31	564.383	2796.5	512.964		512.67	2796.8			594.4	2796.29	1026.5	2795.79
	Ammonium	2800.3	0.61108	-802	6.53685		343.674	2800.72	564.933	2800.41	513.536		513.22	2800.69			595.1	2800.43	1027.27	2799.23
86	Volcanic	2826.11	0.473991	-828	6.5652		346.423	2826.35	569.298	2826.47	517.719		517.33	2826.14			599.644	2826.29	1034.16	2825.29
	Ammonium	2828.12	0.513146	-830	6.56741		346.619	2828.32	569.639	2828.54	517.979		517.64	2828.32			600.005	2828.21	1034.73	2827.23
	Ammonium	2832.27	0.566086	-834	6.57195		347.147	2832.54	570.341	2832.69	518.731		518.39	2832.58			600.902	2832.26	1035.81	2831.3
	Ammonium	2883.23	0.506485	-885	6.62735		352.735	2883.49	578.941	2883.32	526.839		526.64	2883.56			610.017	2883.45	1049.5	2882.34
87	Volcanic	2903.25	0.53156	-905	6.64892		354.897	2903.55	582.142	2903.33	529.925		529.77	2903.65			613.552	2903.39	1055.03	2902.32
	Ammonium	2906.11	0.833406	-908	6.652		355.263	2906.65	582.629	2906.39	530.406		530.24	2906.58			614.106	2906.28	1055.69	2904.64
	Ammonium	2914.2	0.533276	-916	6.66069		356.125	2914.31	583.947	2914.3	531.741		531.46	2914.47			615.562	2914.64	1057.68	2913.28
	Ammonium	2925.4	0.488131	-927	6.67268		357.461	2925.67	585.811	2925.69	533.55		533.33	2925.72			617.527	2925.35	1060.36	2924.57
88	Volcanic	2937.47	0.45452	-939	6.68559		358.883	2937.82	587.815	2937.68	535.629		535.27	2937.67			619.715	2937.51	1063.25	2936.68
	Ammonium	2947.21	0.57148	-949	6.69597		359.985	2947.67	589.554	2947.52	537.31		536.96	2947.4			621.388	2947.25	1065.72	2946.23
	Ammonium	2950.21	0.29255	-952	6.69916		360.267	2950.14	590.078	2950.44	537.876		537.49	2950.5			621.954	2950.19	1066.57	2949.76
	Ammonium	2989.21	0.443534	-991	6.74048		364.569	2989.43	596.462	2989.33	543.79		543.73	2989.54			628.838	2989.32	1076.23	2988.43
	Ammonium	2997.38	0.451276	-999	6.74908		365.534	2997.62	597.834	2997.68	545.07		544.86	2997.5			630.215	2997.51	1078.23	2996.58
	Ammonium	3036.23	0.573358	-1038	6.78981		369.832	3036.69	604.195	3036.52	551.077		550.86	3036.5			637.003	3036.16	1087.45	3035.26
89	Volcanic	3063.06	0.515166	-1065	6.81774		372.928	3063.36	608.757	3063.26	555.313		555.15	3063.33			641.713	3063.22	1093.55	3062.15
90	Volcanic	3072.19	0.521668	-1074	6.8272		373.9	3072.32	610.149	3072.51	556.749		556.51	3072.53			643.27	3072.3	1095.83	3071.28
	Ammonium	3100.39	0.435319	-1102	6.85633		376.9	3100.69	614.4	3100.71	560.757		560.52	3100.58			647.748	3100.32	1102.64	3099.66
91	Volcanic	3107.16	0.392376	-1109	6.86329		377.6	3107.12	615.529	3107.28	561.762		561.61	3107.5			649.093	3107.39	1104.35	3106.5
	Ammonium	3113.31	0.42202	-1115	6.86961		378.319	3113.61	616.565	3113.44	562.733		562.6	3113.64			650.224	3113.26	1105.88	3112.61
	Ammonium	3121.09	0.474177	-1123	6.87759		379.148	3121.34	617.72	3121.39	563.948		563.78	3121.3			651.475	3121.17	1107.65	3120.26
	Ammonium	3156.34	0.404614	-1158	6.91359		383.007	3156.67	623.369	3156.4	569.207		569.05	3156.65			657.364	3156.31	1115.89	3155.67
92	Volcanic	3168.22	0.427868	-1170	6.92567		384.259	3168.54	624.99	3168.38	570.922		570.68	3168.36			659.364	3168.37	1118.66	3167.47
	Ammonium	3174.17	0.578692	-1176	6.93171		384.94	3174.52	626	3174.42	571.772		571.66	3174.57			660.357	3174.18	1120.19	3173.17
	Ammonium	3177.39	0.403182	-1179	6.93497		385.267	3177.56	626.463	3177.59	572.302		572.13	3177.64			660.999	3177.49	1121.15	3176.68
	Ammonium	3182.39	0.57067	-1184	6.94003		385.875	3182.77	627.278	3182.78	573.059		572.95	3182.56			661.847	3182.43	1122.39	3181.4
	Ammonium	3185.19	0.420944	-1187	6.94286		386.166	3185.31	627.717	3185.51	573.499		573.37	3185.47			662.354	3185.19	1123.23	3184.47
	Ammonium	3188.31	0.373256	-1190	6.94601		386.563	3188.61	628.283	3188.39	573.987		573.86	3188.5			662.93	3188.37	1124.05	3187.66
	Ammonium	3209.23	0.505765	-1211	6.96712		388.9	3209.47	631.6	3209.35	577.332		577.16	3209.53			666.545	3209.47	1129.26	3208.33
	Ammonium	3220.22	0.55998	-1222	6.97818		390.177	3220.31	633.377	3220.2	579.12		578.92	3220.57			668.586	3220.74	1131.98	3219.3
	Ammonium	3222.16	0.447934	-1224	6.98012		390.384	3222.27	633.65	3222.22	579.365		579.16	3222.4			668.865	3222.51	1132.48	3221.38
	Ammonium	3234.45	0.487032	-1236	6.99244		391.8	3234.78	635.7	3234.57	581.258		581.1	3234.71			670.876	3234.58	1135.44	3233.59
	Ammonium	3235.37	0.625993	-1237	6.99336		391.9	3235.73	635.862	3235.63	581.43		581.26	3235.57			671.05	3235.67	1135.63	3234.25
	Ammonium	3237.08	0.440196	-1239	6.99508		392.1	3237.34	636.08	3237.18	581.711		581.55	3237.42			671.341	3237.13	1136.23	3236.32
	Ammonium	3244.03	0.524679	-1246	7.00203		392.868	3244.34	637.1	3244.3	582.665		582.53				672.559	3244.23	1138	3243.24
	Ammonium	3260.17	0.527015	-1262	7.01814		394.741	3260.65	639.606	3260.28	585.318		585.19				675.427	3260.35	1142.16	3259.42
	Ammonium	3281.18	0.505447	-1283	7.03903		397.137	3281.39	642.971	3281.51	588.623		588.53				679.06	3281.4	1147.33	3280.43
93	Volcanic	3292.11	0.507463	-1294	7.04986		398.315	3292.56	644.58	3292.38	590.238		590.1				680.862	3292.1	1150.25	3291.4
	Ammonium	3315.07	0.545088	-1317	7.07255		400.9	3315.38	648.202	3315.2	593.798		593.7				684.75	3315.44	1155.95	3314.27
	Ammonium	3324.2	0.396027	-1326	7.08154		401.96	3324.65	649.586	3324.2	595.218		595.07				686.322	3324.27	1158.2	3323.68
	Ammonium	3325.4	0.617086	-1327	7.08272		402.115	3325.91	649.83	3325.62	595.407		595.28				686.55	3325.57	1158.46	3324.51
	Ammonium	3331.04	0.591693	-1333	7.08826		402.77	3331.44	650.734	3331.4	596.404		596.24				687.6	3331.17	1159.89	3330.17
	Ammonium	3334.17	0.649853	-1336	7.09134		403.118	3334.55	651.2	3334.44	596.825		596.7				688.1	3334.5	1160.62	3333.2
	Ammonium	3336.28	0.505363	-1338	7.09341		403.344	3336.56	651.571	3336.69	597.229		597.04				688.372	3336.31	1161.11	3335.56
94	Volcanic	3358.34	0.537565	-1360	7.11502		405.889	3358.86	654.961	3358.3	600.519		600.32				691.964	3358.59	1166.59	3357.61
	Ammonium	3373.14	0.422438	-1375	7.12947		407.554	3373.34	657.2	3373.44	602.706		602.56				694.466	3373.27	1170.23	3372.52
	Ammonium	3386.43	0.507755	-1388	7.1424		409.021	3386.73	659.335	3386.72	604.736		604.64				696.666	3386.61	1173.2	3385.67
95	Volcanic	3404.12	0.530206	-1406	7.15958		411.062	3404.39	662.1	3404.38	607.558		607.38				699.655	3404.4	1177.36	3403.33
96	Volcanic	3418.18	0.45896	-1420	7.17318		412.7	3418.31	664.072	3418.3	609.443		609.29				701.889	3418.59	1180.54	3417.52
97	Volcanic	3423.12	0.497827	-1425	7.17796		413.245	3423.19	664.75	3423.11	610.126		610				702.629	3423.71	1181.67	3422.49
98	Volcanic	3444.26	0.561749	-1446	7.19833		415.812	3444.75	668.302	3444.43	613.534		613.42				706.328	3444.42	1186.56	3443.45
	Ammonium	3458.07	0.499161	-1460	7.21159		417.444	3458.41	670.486	3458.33	615.519		615.46				708.556	3458.21	1189.72	3457.33
	Ammonium	3465.2	0.552062	-1467	7.21843		418.269	3465.7	671.57	3465.43	616.648		616.51				709.681	3465.25	1191.3	3464.42
	Ammonium	3471.08	0.581896	-1473	7.22406		418.965	3471.59	672.262	3471.25	617.465		617.36				710.602	3471.26	1192.63	3470.24
	Ammonium	3478.17	0.624471	-1480	7.23084		419.765	3478.38	673.509	3478.47	618.492		618.33				711.737	3478.58	1194.19	3477.24
	Ammonium	3514.16	0.571497	-1516	7.26513		423.85	3514.33	679.093	3514.69	624.245		623.99				717.804	3514.27	1202.22	3513.35
	Ammonium	3529.05	0.519375	-1531	7.27925		425.573	3529.22	681.456	3529.35	626.281		626.2				720.354	3529.36	1205.7	3528.28
99	Volcanic	3538.09	0.536845	-1540	7.28781		426.547	3538.31	682.758	3538.28	627.639		627.6				721.847	3538.48	1207.58	3537.3
	Ammonium	3542.28	0.61445	-1544	7.29177		426.998	3542.76	683.388	3542.5	628.247		628.18				722.472	3542.48	1208.49	3541.38
	Ammonium	3545.14	0.473522	-1547	7.29447		427.317	3545.42	683.816	3545.51	628.591		628.61				722.932	3545.16	1209.16	3544.46
100	Volcanic	3561.14	0.552693	-1563	7.30956		429.043	3561.41	686.234	3561.48	630.992		630.83				725.604	3561.36	1212.73	3560.31
	Ammonium	3580.18	0.498012	-1582	7.32745		431.099	3580.43	689.07	3580.22	633.893		633.79				728.689	3580.59	1216.98	3579.47
101	Volcanic	3585.33	0.47677	-1587	7.33228		431.695	3585.72	689.829	3585.53	634.712		634.54				729.523	3585.42	1218.09	3584.63
	Ammonium	3588.33	0.594203	-1590	7.33511		432.064	3588.68	690.426	3588.74	635.234		635.07				730.054	3588.46	1218.74	3587.46
102	Volcanic	3627.05	0.605173	-1629	7.37126	(Pearce et al., 2004)	436.356	3627.12	696.149	3627.62	641.001		640.93				736.527	3627.25	1227.53	3626.19
	Ammonium	3631.31	0.591791	-1633	7.37523		436.897	3631.57	696.785	3631.54	641.675		641.64				737.28	3631.7	1228.55	3630.43
	Ammonium	3647.26	0.350638	-1649	7.39004		438.613	3647.52	699.419	3647.41	644.089		643.97				739.728	3647.35	1232	3646.74
103	Volcanic	3652.29	0.70352	-1654	7.39471		439.19	3652.74	700.216	3652.78	644.858		644.67				740.531	3652.37	1232.96	3651.27
	Ammonium	3655.3	0.560924	-1657	7.3975		439.509	3655.6	700.616	3655.53	645.255		645.15				741.016	3655.61	1233.77	3654.46
104	Volcanic	3670.2	0.536552	-1672	7.41128		441.233	3670.5	702.921	3670.41	647.509		647.38				743.424	3670.49	1236.79	3669.4
	Ammonium	3680.14	0.484657	-1682	7.42046		442.374	3680.62	704.412	3680.32	649.051		648.83				745.06	3680.14	1238.84	3679.48
105	Volcanic	3722.25	0.536712	-1724	7.45917		447.18	3722.69	710.648	3722.37	655.284		655.01				751.995	3722.47	1248.29	3721.47
	Ammonium	3727.29	0.672448	-1729	7.46378		447.729	3727.33	711.332	3727.75	656.133		655.88				752.836	3727.74	1249.34	3726.32
	Ammonium	3762.14	0.699711	-1764	7.49558		451.774	3762.67	716.443	3762.53	661.054		661.03				758.26	3762.23	1256.47	3761.13
	Ammonium	3799.08	0.53283	-1801	7.52909		456.015	3799.35	722.02	3799.49	666.473		666.38				764.078	3799.19	1264.41	3798.31
	Ammonium	3824.24	0.590301	-1826	7.55179		459.145	3824.58	725.792	3824.59	670.488		670.28				768.423	3824.42	1269.59	3823.36

## Sheet: 4) Transferred NGRIP ages
Interpolated GICC21 timescale
NorthGRIP 1		NorthGRIP2
range [1800-3835] years b2k		range [39-730] years b2k		range [3244-3835] years b2k
Age, years b2k	Depth, m	Age, years b2k	Depth, m	Age, years b2k	Depth, m
1800	349.075	39	14.3067	3244	582.4
1801	349.243	40	14.6256	3245	582.643
1802	349.41	41	14.9446	3246	582.808
1803	349.578	42	15.2635	3247	582.973
1804	349.746	43	15.5825	3248	583.138
1805	349.91	44	15.9014	3249	583.302
1806	350.072	45	16.2204	3250	583.467
1807	350.234	46	16.5394	3251	583.632
1808	350.395	47	16.8583	3252	583.797
1809	350.557	48	17.1773	3253	583.961
1810	350.718	49	17.4962	3254	584.126
1811	350.88	50	17.8103	3255	584.291
1812	351.041	51	18.1216	3256	584.456
1813	351.203	52	18.433	3257	584.621
1814	351.365	53	18.7444	3258	584.785
1815	351.526	54	19.0557	3259	584.95
1816	351.688	55	19.3671	3260	585.115
1817	351.849	56	19.6784	3261	585.276
1818	352.011	57	19.9898	3262	585.436
1819	352.173	58	20.3012	3263	585.595
1820	352.334	59	20.6125	3264	585.754
1821	352.496	60	20.9239	3265	585.913
1822	352.657	61	21.2352	3266	586.072
1823	352.819	62	21.5466	3267	586.231
1824	352.981	63	21.858	3268	586.39
1825	353.142	64	22.1693	3269	586.549
1826	353.304	65	22.4807	3270	586.708
1827	353.465	66	22.792	3271	586.867
1828	353.627	67	23.1034	3272	587.026
1829	353.789	68	23.4148	3273	587.185
1830	353.963	69	23.7261	3274	587.344
1831	354.143	70	24.0375	3275	587.503
1832	354.322	71	24.3489	3276	587.662
1833	354.502	72	24.6602	3277	587.821
1834	354.682	73	24.9716	3278	587.98
1835	354.862	74	25.2547	3279	588.139
1836	355.041	75	25.499	3280	588.298
1837	355.221	76	25.7432	3281	588.457
1838	355.458	77	25.9875	3282	588.607
1839	355.686	78	26.2317	3283	588.749
1840	355.852	79	26.476	3284	588.892
1841	356.017	80	26.7202	3285	589.035
1842	356.182	81	26.9645	3286	589.177
1843	356.348	82	27.2087	3287	589.32
1844	356.513	83	27.453	3288	589.463
1845	356.678	84	27.6972	3289	589.605
1846	356.843	85	27.9267	3290	589.748
1847	357.009	86	28.1394	3291	589.891
1848	357.174	87	28.3521	3292	590.033
1849	357.339	88	28.4853	3293	590.184
1850	357.504	89	28.5426	3294	590.342
1851	357.67	90	28.6	3295	590.5
1852	357.835	91	28.6573	3296	590.658
1853	358	92	28.7146	3297	590.815
1854	358.165	93	28.7719	3298	590.973
1855	358.331	94	28.8292	3299	591.131
1856	358.496	95	28.8866	3300	591.289
1857	358.661	96	28.9439	3301	591.447
1858	358.827	97	29.0012	3302	591.604
1859	358.992	98	29.0585	3303	591.762
1860	359.157	99	29.1158	3304	591.92
1861	359.322	100	29.1732	3305	592.078
1862	359.488	101	29.2305	3306	592.235
1863	359.653	102	29.2878	3307	592.393
1864	359.818	103	29.3451	3308	592.551
1865	359.985	104	29.4024	3309	592.709
1866	360.154	105	30.2124	3310	592.867
1867	360.323	106	32.012	3311	593.024
1868	360.493	107	33.0167	3312	593.182
1869	360.662	108	33.1521	3313	593.34
1870	360.831	109	33.2875	3314	593.498
1871	361	110	33.4229	3315	593.656
1872	361.169	111	33.7249	3316	593.807
1873	361.339	112	34.0808	3317	593.956
1874	361.508	113	34.4367	3318	594.104
1875	361.677	114	34.7491	3319	594.253
1876	361.846	115	35.0395	3320	594.402
1877	362.015	116	35.3299	3321	594.551
1878	362.184	117	35.504	3322	594.699
1879	362.354	118	35.5621	3323	594.848
1880	362.523	119	35.6201	3324	594.997
1881	362.692	120	35.6781	3325	595.159
1882	362.861	121	35.7361	3326	595.333
1883	363.03	122	35.7941	3327	595.504
1884	363.2	123	35.8522	3328	595.675
1885	363.369	124	35.9102	3329	595.845
1886	363.538	125	35.9682	3330	596.016
1887	363.707	126	36.0262	3331	596.187
1888	363.876	127	36.0842	3332	596.342
1889	364.045	128	36.1422	3333	596.489
1890	364.215	129	36.2258	3334	596.636
1891	364.39	130	36.3196	3335	596.79
1892	364.572	131	36.4135	3336	596.947
1893	364.754	132	36.5073	3337	597.1
1894	364.936	133	36.6012	3338	597.249
1895	365.117	134	36.695	3339	597.399
1896	365.299	135	36.7889	3340	597.548
1897	365.481	136	36.8828	3341	597.697
1898	365.663	137	36.9766	3342	597.846
1899	365.845	138	37.0705	3343	597.995
1900	366.021	139	37.1643	3344	598.144
1901	366.193	140	37.2582	3345	598.293
1902	366.364	141	37.3521	3346	598.442
1903	366.536	142	37.4459	3347	598.591
1904	366.707	143	37.5398	3348	598.74
1905	366.878	144	37.6336	3349	598.889
1906	367.05	145	37.7275	3350	599.038
1907	367.221	146	37.8213	3351	599.187
1908	367.393	147	37.9152	3352	599.336
1909	367.564	148	38.0091	3353	599.486
1910	367.735	149	38.1029	3354	599.635
1911	367.899	150	38.1968	3355	599.784
1912	368.065	151	38.2906	3356	599.933
1913	368.241	152	38.3845	3357	600.082
1914	368.418	153	38.4783	3358	600.231
1915	368.594	154	38.5722	3359	600.381
1916	368.771	155	38.6661	3360	600.532
1917	368.947	156	38.7599	3361	600.683
1918	369.124	157	38.8538	3362	600.834
1919	369.3	158	38.9476	3363	600.986
1920	369.477	159	39.0415	3364	601.137
1921	369.653	160	39.1354	3365	601.288
1922	369.83	161	39.2292	3366	601.439
1923	370.006	162	39.3231	3367	601.59
1924	370.189	163	40.0951	3368	601.742
1925	370.381	164	41.7829	3369	601.893
1926	370.572	165	43.4708	3370	602.044
1927	370.764	166	45.1587	3371	602.195
1928	370.941	167	46.8465	3372	602.346
1929	371.109	168	47.9543	3373	602.498
1930	371.278	169	48.0717	3374	602.652
1931	371.446	170	48.189	3375	602.809
1932	371.614	171	48.3063	3376	602.966
1933	371.782	172	48.4237	3377	603.122
1934	371.95	173	48.541	3378	603.279
1935	372.118	174	48.6583	3379	603.436
1936	372.286	175	48.7756	3380	603.593
1937	372.454	176	48.893	3381	603.75
1938	372.622	177	49.0103	3382	603.906
1939	372.79	178	49.3142	3383	604.063
1940	372.958	179	49.6731	3384	604.22
1941	373.126	180	50.0319	3385	604.377
1942	373.295	181	50.3908	3386	604.533
1943	373.463	182	50.7496	3387	604.69
1944	373.631	183	51.1085	3388	604.845
1945	373.799	184	51.3764	3389	605
1946	373.981	185	51.5449	3390	605.155
1947	374.17	186	51.7133	3391	605.31
1948	374.36	187	51.8818	3392	605.465
1949	374.55	188	52.0502	3393	605.62
1950	374.74	189	52.2187	3394	605.775
1951	374.93	190	52.3871	3395	605.93
1952	375.119	191	52.5556	3396	606.085
1953	375.301	192	53.5098	3397	606.24
1954	375.467	193	54.4946	3398	606.395
1955	375.632	194	54.5622	3399	606.55
1956	375.798	195	54.6297	3400	606.705
1957	375.964	196	54.6927	3401	606.86
1958	376.129	197	54.7529	3402	607.015
1959	376.295	198	54.8131	3403	607.17
1960	376.46	199	54.8732	3404	607.325
1961	376.626	200	54.9334	3405	607.468
1962	376.792	201	54.9936	3406	607.605
1963	376.957	202	55.0538	3407	607.741
1964	377.123	203	55.114	3408	607.878
1965	377.289	204	55.1742	3409	608.014
1966	377.454	205	55.2343	3410	608.151
1967	377.62	206	55.2945	3411	608.287
1968	377.786	207	56.6994	3412	608.423
1969	377.951	208	57.9064	3413	608.56
1970	378.117	209	57.9499	3414	608.696
1971	378.282	210	57.9933	3415	608.833
1972	378.448	211	58.0643	3416	608.969
1973	378.614	212	58.1795	3417	609.105
1974	378.779	213	58.2947	3418	609.242
1975	378.945	214	58.4099	3419	609.383
1976	379.113	215	58.5252	3420	609.527
1977	379.283	216	58.6404	3421	609.672
1978	379.454	217	58.7875	3422	609.816
1979	379.625	218	58.9687	3423	609.96
1980	379.795	219	59.1499	3424	610.117
1981	379.966	220	59.3311	3425	610.278
1982	380.136	221	59.5123	3426	610.438
1983	380.307	222	59.6935	3427	610.599
1984	380.477	223	59.8747	3428	610.76
1985	380.648	224	60.0559	3429	610.921
1986	380.819	225	60.2371	3430	611.082
1987	380.989	226	60.692	3431	611.243
1988	381.16	227	61.3271	3432	611.404
1989	381.33	228	61.9622	3433	611.565
1990	381.501	229	62.2553	3434	611.726
1991	381.672	230	62.3282	3435	611.887
1992	381.842	231	62.401	3436	612.047
1993	382.013	232	62.4738	3437	612.208
1994	382.183	233	62.5467	3438	612.369
1995	382.354	234	62.6195	3439	612.53
1996	382.524	235	62.6924	3440	612.691
1997	382.695	236	62.7652	3441	612.852
1998	382.866	237	63.6014	3442	613.013
1999	383.036	238	64.5567	3443	613.174
2000	383.207	239	64.5842	3444	613.335
2001	383.377	240	64.6117	3445	613.489
2002	383.548	241	64.6392	3446	613.637
2003	383.719	242	64.6667	3447	613.784
2004	383.889	243	64.6941	3448	613.932
2005	384.06	244	64.7216	3449	614.079
2006	384.23	245	64.8155	3450	614.226
2007	384.401	246	64.9385	3451	614.374
2008	384.571	247	65.0615	3452	614.521
2009	384.742	248	65.1845	3453	614.669
2010	384.913	249	65.3075	3454	614.816
2011	385.083	250	65.4305	3455	614.963
2012	385.254	251	65.5534	3456	615.111
2013	385.424	252	65.6764	3457	615.258
2014	385.595	253	65.7994	3458	615.406
2015	385.766	254	65.9224	3459	615.553
2016	385.936	255	66.0454	3460	615.7
2017	386.107	256	66.1684	3461	615.847
2018	386.277	257	66.4226	3462	615.994
2019	386.448	258	66.7624	3463	616.141
2020	386.619	259	67.1022	3464	616.288
2021	386.789	260	67.4421	3465	616.434
2022	386.96	261	67.7819	3466	616.581
2023	387.13	262	68.1218	3467	616.727
2024	387.301	263	68.4616	3468	616.873
2025	387.471	264	68.7388	3469	617.019
2026	387.642	265	68.9467	3470	617.165
2027	387.818	266	69.1547	3471	617.311
2028	387.998	267	69.3627	3472	617.452
2029	388.178	268	69.5706	3473	617.59
2030	388.359	269	69.7786	3474	617.728
2031	388.539	270	69.9865	3475	617.867
2032	388.719	271	70.1945	3476	618.005
2033	388.895	272	70.3291	3477	618.144
2034	389.057	273	70.4015	3478	618.282
2035	389.218	274	70.4739	3479	618.432
2036	389.38	275	70.5463	3480	618.589
2037	389.542	276	70.6186	3481	618.746
2038	389.704	277	70.691	3482	618.902
2039	389.866	278	70.7634	3483	619.059
2040	390.027	279	70.8358	3484	619.216
2041	390.189	280	70.9081	3485	619.373
2042	390.362	281	70.9805	3486	619.53
2043	390.539	282	71.0529	3487	619.686
2044	390.71	283	71.1253	3488	619.843
2045	390.874	284	71.2226	3489	620
2046	391.038	285	71.3292	3490	620.157
2047	391.203	286	71.4358	3491	620.314
2048	391.367	287	71.5424	3492	620.47
2049	391.532	288	71.649	3493	620.627
2050	391.696	289	71.7556	3494	620.784
2051	391.86	290	71.8622	3495	620.941
2052	392.025	291	71.9689	3496	621.097
2053	392.189	292	72.2143	3497	621.254
2054	392.356	293	72.6083	3498	621.411
2055	392.525	294	73.0024	3499	621.568
2056	392.695	295	73.3965	3500	621.725
2057	392.864	296	73.7905	3501	621.881
2058	393.034	297	74.1846	3502	622.038
2059	393.203	298	74.4478	3503	622.195
2060	393.373	299	74.538	3504	622.352
2061	393.542	300	74.6282	3505	622.509
2062	393.711	301	74.7184	3506	622.665
2063	393.881	302	74.8086	3507	622.822
2064	394.05	303	74.8988	3508	622.979
2065	394.22	304	74.9889	3509	623.136
2066	394.389	305	75.0791	3510	623.293
2067	394.559	306	75.1693	3511	623.449
2068	394.728	307	75.2595	3512	623.606
2069	394.898	308	75.3497	3513	623.763
2070	395.067	309	75.4399	3514	623.92
2071	395.236	310	75.5301	3515	624.072
2072	395.406	311	75.6203	3516	624.222
2073	395.575	312	75.7104	3517	624.371
2074	395.745	313	75.8006	3518	624.52
2075	395.914	314	75.8908	3519	624.669
2076	396.084	315	75.981	3520	624.819
2077	396.253	316	76.0712	3521	624.968
2078	396.423	317	76.1492	3522	625.117
2079	396.592	318	76.218	3523	625.267
2080	396.761	319	76.2868	3524	625.416
2081	396.931	320	76.3556	3525	625.565
2082	397.1	321	76.4244	3526	625.714
2083	397.27	322	76.4932	3527	625.864
2084	397.439	323	76.562	3528	626.013
2085	397.609	324	76.6308	3529	626.162
2086	397.778	325	76.6996	3530	626.316
2087	397.948	326	76.7684	3531	626.471
2088	398.117	327	76.8372	3532	626.626
2089	398.289	328	76.906	3533	626.782
2090	398.463	329	76.9748	3534	626.937
2091	398.638	330	77.0436	3535	627.092
2092	398.812	331	77.1124	3536	627.247
2093	398.986	332	77.1812	3537	627.403
2094	399.16	333	77.4752	3538	627.558
2095	399.335	334	77.8205	3539	627.699
2096	399.509	335	78.1659	3540	627.834
2097	399.683	336	78.5112	3541	627.968
2098	399.857	337	78.8565	3542	628.103
2099	400.032	338	79.2019	3543	628.244
2100	400.206	339	79.5472	3544	628.392
2101	400.38	340	79.8925	3545	628.54
2102	400.554	341	80.2379	3546	628.683
2103	400.728	342	80.5832	3547	628.823
2104	400.903	343	80.9285	3548	628.962
2105	401.077	344	81.2595	3549	629.102
2106	401.251	345	81.5834	3550	629.242
2107	401.425	346	81.9073	3551	629.381
2108	401.6	347	82.2311	3552	629.521
2109	401.774	348	82.555	3553	629.661
2110	401.948	349	82.8789	3554	629.8
2111	402.122	350	83.2027	3555	629.94
2112	402.297	351	83.5266	3556	630.08
2113	402.471	352	83.8505	3557	630.219
2114	402.62	353	84.1744	3558	630.359
2115	402.75	354	84.554	3559	630.499
2116	402.9	355	84.975	3560	630.638
2117	403.062	356	85.3959	3561	630.778
2118	403.223	357	85.8168	3562	630.927
2119	403.384	358	86.2377	3563	631.083
2120	403.545	359	86.6851	3564	631.239
2121	403.721	360	87.1594	3565	631.394
2122	403.907	361	87.6337	3566	631.55
2123	404.093	362	88.1079	3567	631.705
2124	404.279	363	88.4574	3568	631.861
2125	404.465	364	88.5321	3569	632.017
2126	404.651	365	88.6068	3570	632.172
2127	404.836	366	88.6816	3571	632.328
2128	405.022	367	88.7563	3572	632.483
2129	405.208	368	88.8311	3573	632.639
2130	405.382	369	88.9058	3574	632.795
2131	405.549	370	88.9806	3575	632.95
2132	405.716	371	89.0553	3576	633.106
2133	405.883	372	89.13	3577	633.261
2134	406.053	373	89.2048	3578	633.417
2135	406.225	374	89.2795	3579	633.573
2136	406.397	375	89.3543	3580	633.728
2137	406.57	376	89.429	3581	633.877
2138	406.742	377	89.477	3582	634.022
2139	406.91	378	89.5106	3583	634.166
2140	407.071	379	89.5442	3584	634.311
2141	407.232	380	89.5779	3585	634.455
2142	407.392	381	89.6115	3586	634.613
2143	407.553	382	89.6452	3587	634.788
2144	407.713	383	89.6788	3588	634.963
2145	407.874	384	89.7125	3589	635.129
2146	408.034	385	89.7461	3590	635.28
2147	408.195	386	89.7798	3591	635.432
2148	408.355	387	89.8134	3592	635.583
2149	408.516	388	89.8471	3593	635.735
2150	408.676	389	89.8807	3594	635.886
2151	408.837	390	89.9144	3595	636.038
2152	408.998	391	89.948	3596	636.189
2153	409.158	392	89.9817	3597	636.341
2154	409.319	393	90.0153	3598	636.492
2155	409.479	394	90.049	3599	636.644
2156	409.64	395	90.0826	3600	636.795
2157	409.8	396	90.1163	3601	636.947
2158	409.961	397	90.1499	3602	637.098
2159	410.121	398	90.2121	3603	637.25
2160	410.282	399	90.3729	3604	637.401
2161	410.443	400	90.5337	3605	637.553
2162	410.603	401	90.6945	3606	637.704
2163	410.764	402	90.8553	3607	637.856
2164	410.924	403	91.0161	3608	638.007
2165	411.085	404	91.1769	3609	638.159
2166	411.243	405	91.3378	3610	638.31
2167	411.401	406	91.4986	3611	638.462
2168	411.558	407	91.6594	3612	638.613
2169	411.716	408	91.8202	3613	638.765
2170	411.873	409	91.981	3614	638.916
2171	412.031	410	92.1418	3615	639.068
2172	412.188	411	92.3026	3616	639.219
2173	412.346	412	92.4634	3617	639.371
2174	412.503	413	92.6242	3618	639.522
2175	412.661	414	92.785	3619	639.674
2176	412.818	415	93.0177	3620	639.825
2177	412.976	416	93.3199	3621	639.977
2178	413.133	417	93.6221	3622	640.129
2179	413.291	418	93.9242	3623	640.28
2180	413.449	419	94.2264	3624	640.432
2181	413.606	420	94.5286	3625	640.583
2182	413.764	421	94.8307	3626	640.735
2183	413.921	422	95.1329	3627	640.886
2184	414.079	423	95.4351	3628	641.048
2185	414.236	424	95.7372	3629	641.215
2186	414.394	425	96.0394	3630	641.382
2187	414.551	426	96.3416	3631	641.549
2188	414.709	427	96.6437	3632	641.706
2189	414.869	428	96.9459	3633	641.851
2190	415.036	429	97.6195	3634	641.997
2191	415.202	430	98.503	3635	642.142
2192	415.369	431	99.3865	3636	642.287
2193	415.535	432	100.27	3637	642.433
2194	415.702	433	100.687	3638	642.578
2195	415.868	434	100.954	3639	642.723
2196	416.035	435	101.222	3640	642.869
2197	416.201	436	101.489	3641	643.014
2198	416.368	437	101.757	3642	643.159
2199	416.534	438	102.024	3643	643.305
2200	416.7	439	102.292	3644	643.45
2201	416.867	440	102.559	3645	643.595
2202	417.033	441	102.827	3646	643.741
2203	417.2	442	103.094	3647	643.886
2204	417.366	443	103.207	3648	644.029
2205	417.533	444	103.243	3649	644.168
2206	417.699	445	103.279	3650	644.307
2207	417.866	446	103.315	3651	644.446
2208	418.032	447	103.351	3652	644.585
2209	418.199	448	103.386	3653	644.734
2210	418.365	449	103.422	3654	644.896
2211	418.532	450	103.458	3655	645.059
2212	418.698	451	103.494	3656	645.215
2213	418.862	452	103.53	3657	645.365
2214	419.025	453	103.566	3658	645.515
2215	419.187	454	103.602	3659	645.665
2216	419.349	455	103.638	3660	645.815
2217	419.511	456	103.674	3661	645.965
2218	419.674	457	103.709	3662	646.115
2219	419.836	458	103.745	3663	646.265
2220	419.998	459	103.781	3664	646.415
2221	420.161	460	103.817	3665	646.565
2222	420.323	461	103.853	3666	646.715
2223	420.485	462	103.889	3667	646.865
2224	420.647	463	103.948	3668	647.015
2225	420.81	464	104.026	3669	647.165
2226	420.972	465	104.104	3670	647.315
2227	421.134	466	104.182	3671	647.461
2228	421.297	467	104.26	3672	647.605
2229	421.459	468	104.338	3673	647.749
2230	421.621	469	104.416	3674	647.893
2231	421.783	470	104.494	3675	648.037
2232	421.946	471	104.572	3676	648.181
2233	422.108	472	104.65	3677	648.325
2234	422.27	473	104.728	3678	648.469
2235	422.433	474	104.806	3679	648.613
2236	422.595	475	104.884	3680	648.757
2237	422.757	476	104.962	3681	648.903
2238	422.92	477	105.039	3682	649.05
2239	423.082	478	105.117	3683	649.197
2240	423.238	479	105.195	3684	649.344
2241	423.392	480	105.273	3685	649.491
2242	423.546	481	105.351	3686	649.639
2243	423.701	482	105.429	3687	649.786
2244	423.855	483	105.507	3688	649.933
2245	424.009	484	105.585	3689	650.08
2246	424.163	485	105.663	3690	650.227
2247	424.317	486	105.741	3691	650.374
2248	424.472	487	105.819	3692	650.522
2249	424.626	488	107.872	3693	650.669
2250	424.78	489	109.958	3694	650.816
2251	424.942	490	110.791	3695	650.963
2252	425.108	491	111.624	3696	651.11
2253	425.274	492	112.457	3697	651.257
2254	425.44	493	113.29	3698	651.405
2255	425.606	494	114.122	3699	651.552
2256	425.772	495	114.383	3700	651.699
2257	425.938	496	114.431	3701	651.846
2258	426.104	497	114.48	3702	651.993
2259	426.27	498	114.756	3703	652.14
2260	426.436	499	115.137	3704	652.288
2261	426.602	500	115.518	3705	652.435
2262	426.768	501	115.72	3706	652.582
2263	426.934	502	115.746	3707	652.729
2264	427.1	503	115.773	3708	652.876
2265	427.266	504	115.8	3709	653.023
2266	427.432	505	115.826	3710	653.171
2267	427.598	506	115.853	3711	653.318
2268	427.761	507	115.88	3712	653.465
2269	427.92	508	115.906	3713	653.612
2270	428.078	509	115.933	3714	653.759
2271	428.237	510	115.96	3715	653.907
2272	428.395	511	115.986	3716	654.054
2273	428.554	512	116.013	3717	654.201
2274	428.713	513	116.04	3718	654.348
2275	428.871	514	116.066	3719	654.495
2276	429.031	515	116.093	3720	654.642
2277	429.193	516	116.12	3721	654.79
2278	429.354	517	116.146	3722	654.937
2279	429.515	518	116.173	3723	655.097
2280	429.677	519	116.2	3724	655.271
2281	429.838	520	116.226	3725	655.446
2282	430	521	116.253	3726	655.62
2283	430.161	522	116.28	3727	655.794
2284	430.323	523	116.309	3728	655.954
2285	430.484	524	116.343	3729	656.102
2286	430.646	525	116.378	3730	656.249
2287	430.807	526	116.413	3731	656.396
2288	430.968	527	116.448	3732	656.544
2289	431.13	528	116.483	3733	656.691
2290	431.291	529	116.518	3734	656.839
2291	431.453	530	116.553	3735	656.986
2292	431.614	531	116.588	3736	657.134
2293	431.776	532	116.623	3737	657.281
2294	431.937	533	116.658	3738	657.428
2295	432.098	534	116.693	3739	657.576
2296	432.26	535	116.728	3740	657.723
2297	432.421	536	116.763	3741	657.871
2298	432.583	537	116.797	3742	658.018
2299	432.744	538	116.832	3743	658.166
2300	432.906	539	116.867	3744	658.313
2301	433.067	540	116.902	3745	658.46
2302	433.229	541	117.468	3746	658.608
2303	433.39	542	118.117	3747	658.755
2304	433.551	543	118.766	3748	658.903
2305	433.713	544	119.416	3749	659.05
2306	433.874	545	120.065	3750	659.198
2307	434.036	546	120.714	3751	659.345
2308	434.197	547	122.638	3752	659.492
2309	434.359	548	124.316	3753	659.64
2310	434.52	549	124.383	3754	659.787
2311	434.681	550	124.45	3755	659.935
2312	434.843	551	124.517	3756	660.082
2313	435.004	552	124.583	3757	660.23
2314	435.166	553	124.65	3758	660.377
2315	435.327	554	124.717	3759	660.524
2316	435.509	555	124.784	3760	660.672
2317	435.725	556	124.851	3761	660.819
2318	435.941	557	124.918	3762	660.967
2319	436.122	558	124.984	3763	661.113
2320	436.283	559	125.051	3764	661.257
2321	436.444	560	125.118	3765	661.402
2322	436.605	561	125.185	3766	661.546
2323	436.766	562	125.252	3767	661.691
2324	436.926	563	125.318	3768	661.836
2325	437.087	564	125.385	3769	661.98
2326	437.248	565	125.452	3770	662.125
2327	437.409	566	125.519	3771	662.27
2328	437.57	567	125.586	3772	662.414
2329	437.731	568	125.627	3773	662.559
2330	437.892	569	125.654	3774	662.704
2331	438.058	570	125.68	3775	662.848
2332	438.23	571	125.707	3776	662.993
2333	438.403	572	125.733	3777	663.138
2334	438.576	573	125.76	3778	663.282
2335	438.749	574	125.786	3779	663.427
2336	438.922	575	125.973	3780	663.572
2337	439.094	576	126.283	3781	663.716
2338	439.267	577	126.594	3782	663.861
2339	439.44	578	126.904	3783	664.005
2340	439.596	579	127.215	3784	664.15
2341	439.738	580	127.525	3785	664.295
2342	439.879	581	127.836	3786	664.439
2343	440.02	582	128.146	3787	664.584
2344	440.161	583	128.457	3788	664.729
2345	440.303	584	128.767	3789	664.873
2346	440.444	585	129.077	3790	665.018
2347	440.585	586	129.388	3791	665.163
2348	440.726	587	129.594	3792	665.307
2349	440.868	588	129.671	3793	665.452
2350	441.009	589	129.748	3794	665.597
2351	441.184	590	129.824	3795	665.741
2352	441.367	591	129.901	3796	665.886
2353	441.537	592	129.978	3797	666.031
2354	441.706	593	130.055	3798	666.175
2355	441.875	594	130.132	3799	666.32
2356	442.045	595	130.209	3800	666.471
2357	442.214	596	130.286	3801	666.627
2358	442.383	597	130.363	3802	666.782
2359	442.553	598	130.44	3803	666.938
2360	442.722	599	130.517	3804	667.093
2361	442.891	600	130.594	3805	667.249
2362	443.06	601	130.671	3806	667.404
2363	443.23	602	130.748	3807	667.56
2364	443.399	603	130.825	3808	667.715
2365	443.568	604	130.902	3809	667.871
2366	443.738	605	131.275	3810	668.026
2367	443.907	606	131.893	3811	668.182
2368	444.076	607	132.511	3812	668.337
2369	444.246	608	133.128	3813	668.493
2370	444.415	609	133.619	3814	668.648
2371	444.584	610	134.029	3815	668.804
2372	444.754	611	134.439	3816	668.959
2373	444.923	612	134.849	3817	669.115
2374	445.08	613	135.259	3818	669.27
2375	445.237	614	135.669	3819	669.426
2376	445.399	615	136.079	3820	669.581
2377	445.562	616	136.489	3821	669.737
2378	445.724	617	136.809	3822	669.892
2379	445.887	618	137.017	3823	670.048
2380	446.049	619	137.224	3824	670.203
2381	446.212	620	137.432	3825	670.353
2382	446.374	621	137.974	3826	670.498
2383	446.537	622	138.722	3827	670.643
2384	446.699	623	138.991	3828	670.788
2385	446.862	624	139.069	3829	670.933
2386	447.024	625	139.147	3830	671.078
2387	447.187	626	139.224	3831	671.223
2388	447.349	627	139.302	3832	671.368
2389	447.512	628	139.38	3833	671.513
2390	447.673	629	139.458	3834	671.657
2391	447.831	630	139.536	3835	671.802
2392	447.99	631	139.627
2393	448.149	632	139.731
2394	448.313	633	139.835
2395	448.48	634	139.939
2396	448.647	635	140.278
2397	448.814	636	140.823
2398	448.98	637	141.368
2399	449.147	638	141.607
2400	449.314	639	141.663
2401	449.481	640	141.72
2402	449.648	641	141.776
2403	449.815	642	141.832
2404	449.982	643	141.888
2405	450.149	644	141.944
2406	450.315	645	142.001
2407	450.482	646	142.057
2408	450.649	647	142.113
2409	450.816	648	142.169
2410	450.983	649	142.226
2411	451.151	650	142.444
2412	451.319	651	142.77
2413	451.486	652	144.098
2414	451.658	653	145.114
2415	451.835	654	145.255
2416	451.993	655	145.343
2417	452.138	656	145.407
2418	452.282	657	145.471
2419	452.427	658	145.77
2420	452.572	659	146.115
2421	452.716	660	146.17
2422	452.861	661	146.225
2423	453.006	662	146.28
2424	453.157	663	146.335
2425	453.313	664	146.39
2426	453.469	665	146.444
2427	453.625	666	146.499
2428	453.781	667	146.554
2429	453.936	668	146.594
2430	454.092	669	146.623
2431	454.248	670	146.651
2432	454.41	671	146.68
2433	454.578	672	146.708
2434	454.745	673	146.737
2435	454.912	674	146.765
2436	455.079	675	146.794
2437	455.246	676	146.823
2438	455.414	677	146.851
2439	455.581	678	146.947
2440	455.748	679	147.074
2441	455.915	680	147.2
2442	456.083	681	147.327
2443	456.25	682	147.454
2444	456.417	683	147.58
2445	456.584	684	147.707
2446	456.751	685	147.833
2447	456.918	686	147.96
2448	457.085	687	148.086
2449	457.252	688	148.213
2450	457.419	689	148.34
2451	457.586	690	148.466
2452	457.753	691	149.637
2453	457.92	692	150.96
2454	458.087	693	152.087
2455	458.254	694	152.508
2456	458.421	695	152.521
2457	458.588	696	152.534
2458	458.755	697	152.548
2459	458.922	698	152.561
2460	459.089	699	152.575
2461	459.256	700	152.588
2462	459.433	701	152.602
2463	459.606	702	152.615
2464	459.76	703	152.629
2465	459.913	704	152.642
2466	460.067	705	152.656
2467	460.22	706	152.669
2468	460.374	707	152.683
2469	460.528	708	152.696
2470	460.681	709	152.709
2471	460.835	710	152.723
2472	460.988	711	152.736
2473	461.142	712	152.875
2474	461.296	713	153.102
2475	461.449	714	154.215
2476	461.603	715	155.581
2477	461.756	716	156.301
2478	461.91	717	156.372
2479	462.064	718	156.443
2480	462.217	719	156.515
2481	462.371	720	156.712
2482	462.524	721	157.04
2483	462.678	722	157.372
2484	462.832	723	157.703
2485	462.985	724	157.991
2486	463.139	725	158.264
2487	463.292	726	158.537
2488	463.446	727	158.809
2489	463.599	728	159.082
2490	463.758	729	159.355
2491	463.921	730	159.628
2492	464.084
2493	464.247
2494	464.41
2495	464.574
2496	464.737
2497	464.9
2498	465.063
2499	465.236
2500	465.419
2501	465.601
2502	465.783
2503	465.965
2504	466.147
2505	466.329
2506	466.512
2507	466.694
2508	466.876
2509	467.046
2510	467.21
2511	467.374
2512	467.538
2513	467.702
2514	467.866
2515	468.031
2516	468.195
2517	468.359
2518	468.523
2519	468.687
2520	468.851
2521	469.015
2522	469.179
2523	469.343
2524	469.507
2525	469.671
2526	469.835
2527	469.999
2528	470.164
2529	470.328
2530	470.492
2531	470.656
2532	470.82
2533	470.981
2534	471.138
2535	471.295
2536	471.452
2537	471.609
2538	471.766
2539	471.921
2540	472.073
2541	472.226
2542	472.378
2543	472.531
2544	472.683
2545	472.836
2546	472.99
2547	473.146
2548	473.303
2549	473.459
2550	473.615
2551	473.772
2552	473.928
2553	474.085
2554	474.241
2555	474.397
2556	474.554
2557	474.71
2558	474.867
2559	475.023
2560	475.164
2561	475.319
2562	475.507
2563	475.678
2564	475.827
2565	475.977
2566	476.127
2567	476.276
2568	476.426
2569	476.579
2570	476.74
2571	476.901
2572	477.062
2573	477.223
2574	477.384
2575	477.545
2576	477.706
2577	477.867
2578	478.028
2579	478.189
2580	478.35
2581	478.511
2582	478.672
2583	478.833
2584	478.994
2585	479.155
2586	479.316
2587	479.477
2588	479.638
2589	479.799
2590	479.959
2591	480.12
2592	480.281
2593	480.442
2594	480.598
2595	480.749
2596	480.901
2597	481.053
2598	481.204
2599	481.356
2600	481.526
2601	481.72
2602	481.914
2603	482.093
2604	482.253
2605	482.413
2606	482.574
2607	482.734
2608	482.895
2609	483.055
2610	483.216
2611	483.376
2612	483.537
2613	483.697
2614	483.858
2615	484.018
2616	484.178
2617	484.339
2618	484.499
2619	484.66
2620	484.832
2621	485.02
2622	485.207
2623	485.395
2624	485.582
2625	485.769
2626	485.963
2627	486.139
2628	486.299
2629	486.46
2630	486.622
2631	486.762
2632	486.901
2633	487.057
2634	487.214
2635	487.37
2636	487.527
2637	487.683
2638	487.84
2639	487.997
2640	488.153
2641	488.31
2642	488.466
2643	488.625
2644	488.785
2645	488.939
2646	489.091
2647	489.243
2648	489.395
2649	489.547
2650	489.699
2651	489.85
2652	490.002
2653	490.154
2654	490.306
2655	490.458
2656	490.61
2657	490.765
2658	490.922
2659	491.08
2660	491.237
2661	491.395
2662	491.552
2663	491.71
2664	491.867
2665	492.025
2666	492.182
2667	492.34
2668	492.497
2669	492.655
2670	492.812
2671	492.97
2672	493.127
2673	493.284
2674	493.442
2675	493.599
2676	493.756
2677	493.913
2678	494.07
2679	494.227
2680	494.384
2681	494.541
2682	494.698
2683	494.855
2684	495.012
2685	495.169
2686	495.326
2687	495.483
2688	495.641
2689	495.798
2690	495.955
2691	496.107
2692	496.257
2693	496.406
2694	496.556
2695	496.705
2696	496.855
2697	497.004
2698	497.154
2699	497.307
2700	497.463
2701	497.62
2702	497.776
2703	497.932
2704	498.089
2705	498.245
2706	498.401
2707	498.558
2708	498.714
2709	498.87
2710	499.027
2711	499.183
2712	499.339
2713	499.495
2714	499.652
2715	499.808
2716	499.964
2717	500.121
2718	500.277
2719	500.433
2720	500.59
2721	500.746
2722	500.902
2723	501.059
2724	501.215
2725	501.371
2726	501.527
2727	501.684
2728	501.84
2729	501.996
2730	502.153
2731	502.309
2732	502.465
2733	502.622
2734	502.778
2735	502.934
2736	503.09
2737	503.247
2738	503.403
2739	503.559
2740	503.716
2741	503.872
2742	504.028
2743	504.185
2744	504.341
2745	504.497
2746	504.654
2747	504.81
2748	504.966
2749	505.122
2750	505.279
2751	505.442
2752	505.609
2753	505.777
2754	505.944
2755	506.112
2756	506.278
2757	506.442
2758	506.607
2759	506.772
2760	506.936
2761	507.101
2762	507.265
2763	507.43
2764	507.594
2765	507.759
2766	507.924
2767	508.088
2768	508.253
2769	508.417
2770	508.582
2771	508.747
2772	508.911
2773	509.076
2774	509.24
2775	509.405
2776	509.57
2777	509.734
2778	509.899
2779	510.064
2780	510.228
2781	510.393
2782	510.558
2783	510.722
2784	510.887
2785	511.052
2786	511.217
2787	511.381
2788	511.546
2789	511.711
2790	511.876
2791	512.04
2792	512.205
2793	512.37
2794	512.535
2795	512.699
2796	512.864
2797	513.022
2798	513.168
2799	513.315
2800	513.462
2801	513.616
2802	513.778
2803	513.94
2804	514.102
2805	514.264
2806	514.426
2807	514.589
2808	514.751
2809	514.913
2810	515.075
2811	515.237
2812	515.399
2813	515.561
2814	515.723
2815	515.885
2816	516.047
2817	516.209
2818	516.371
2819	516.533
2820	516.696
2821	516.858
2822	517.02
2823	517.182
2824	517.344
2825	517.506
2826	517.668
2827	517.807
2828	517.934
2829	518.096
2830	518.276
2831	518.456
2832	518.637
2833	518.807
2834	518.966
2835	519.125
2836	519.285
2837	519.444
2838	519.603
2839	519.763
2840	519.922
2841	520.081
2842	520.241
2843	520.4
2844	520.559
2845	520.718
2846	520.878
2847	521.037
2848	521.196
2849	521.356
2850	521.515
2851	521.674
2852	521.834
2853	521.993
2854	522.152
2855	522.311
2856	522.471
2857	522.63
2858	522.789
2859	522.949
2860	523.108
2861	523.267
2862	523.427
2863	523.586
2864	523.745
2865	523.905
2866	524.064
2867	524.223
2868	524.382
2869	524.542
2870	524.701
2871	524.86
2872	525.02
2873	525.179
2874	525.338
2875	525.498
2876	525.657
2877	525.816
2878	525.975
2879	526.135
2880	526.294
2881	526.453
2882	526.613
2883	526.772
2884	526.928
2885	527.082
2886	527.236
2887	527.39
2888	527.544
2889	527.698
2890	527.852
2891	528.006
2892	528.16
2893	528.314
2894	528.468
2895	528.622
2896	528.776
2897	528.93
2898	529.084
2899	529.238
2900	529.392
2901	529.545
2902	529.699
2903	529.853
2904	530.008
2905	530.164
2906	530.319
2907	530.482
2908	530.653
2909	530.825
2910	530.996
2911	531.168
2912	531.339
2913	531.511
2914	531.683
2915	531.846
2916	532.006
2917	532.166
2918	532.326
2919	532.486
2920	532.645
2921	532.805
2922	532.965
2923	533.125
2924	533.284
2925	533.444
2926	533.608
2927	533.781
2928	533.953
2929	534.126
2930	534.298
2931	534.471
2932	534.644
2933	534.816
2934	534.989
2935	535.161
2936	535.334
2937	535.506
2938	535.679
2939	535.851
2940	536.024
2941	536.196
2942	536.368
2943	536.541
2944	536.713
2945	536.886
2946	537.058
2947	537.23
2948	537.412
2949	537.6
2950	537.789
2951	537.958
2952	538.11
2953	538.261
2954	538.413
2955	538.565
2956	538.717
2957	538.868
2958	539.02
2959	539.172
2960	539.324
2961	539.476
2962	539.627
2963	539.779
2964	539.931
2965	540.083
2966	540.234
2967	540.386
2968	540.538
2969	540.69
2970	540.841
2971	540.993
2972	541.145
2973	541.297
2974	541.448
2975	541.6
2976	541.752
2977	541.904
2978	542.055
2979	542.207
2980	542.359
2981	542.511
2982	542.663
2983	542.814
2984	542.966
2985	543.118
2986	543.27
2987	543.421
2988	543.573
2989	543.725
2990	543.879
2991	544.036
2992	544.193
2993	544.349
2994	544.506
2995	544.663
2996	544.819
2997	544.976
2998	545.132
2999	545.286
3000	545.441
3001	545.595
3002	545.75
3003	545.904
3004	546.058
3005	546.213
3006	546.367
3007	546.522
3008	546.676
3009	546.831
3010	546.985
3011	547.14
3012	547.294
3013	547.449
3014	547.603
3015	547.758
3016	547.912
3017	548.067
3018	548.221
3019	548.376
3020	548.53
3021	548.685
3022	548.839
3023	548.994
3024	549.148
3025	549.303
3026	549.457
3027	549.612
3028	549.766
3029	549.921
3030	550.075
3031	550.229
3032	550.384
3033	550.538
3034	550.693
3035	550.847
3036	551.002
3037	551.158
3038	551.316
3039	551.474
3040	551.633
3041	551.791
3042	551.949
3043	552.107
3044	552.265
3045	552.423
3046	552.581
3047	552.739
3048	552.897
3049	553.056
3050	553.214
3051	553.372
3052	553.53
3053	553.688
3054	553.846
3055	554.004
3056	554.162
3057	554.32
3058	554.479
3059	554.637
3060	554.795
3061	554.953
3062	555.111
3063	555.269
3064	555.427
3065	555.584
3066	555.741
3067	555.899
3068	556.056
3069	556.214
3070	556.371
3071	556.528
3072	556.686
3073	556.834
3074	556.976
3075	557.117
3076	557.259
3077	557.401
3078	557.543
3079	557.685
3080	557.827
3081	557.968
3082	558.11
3083	558.252
3084	558.394
3085	558.536
3086	558.678
3087	558.819
3088	558.961
3089	559.103
3090	559.245
3091	559.387
3092	559.529
3093	559.67
3094	559.812
3095	559.954
3096	560.096
3097	560.238
3098	560.38
3099	560.521
3100	560.663
3101	560.808
3102	560.958
3103	561.109
3104	561.259
3105	561.409
3106	561.56
3107	561.71
3108	561.864
3109	562.02
3110	562.176
3111	562.332
3112	562.488
3113	562.644
3114	562.8
3115	562.957
3116	563.114
3117	563.271
3118	563.428
3119	563.585
3120	563.741
3121	563.898
3122	564.05
3123	564.199
3124	564.348
3125	564.497
3126	564.646
3127	564.795
3128	564.944
3129	565.093
3130	565.242
3131	565.391
3132	565.54
3133	565.689
3134	565.838
3135	565.987
3136	566.136
3137	566.285
3138	566.434
3139	566.584
3140	566.733
3141	566.882
3142	567.031
3143	567.18
3144	567.329
3145	567.478
3146	567.627
3147	567.776
3148	567.925
3149	568.074
3150	568.223
3151	568.372
3152	568.521
3153	568.67
3154	568.819
3155	568.968
3156	569.117
3157	569.265
3158	569.41
3159	569.555
3160	569.699
3161	569.844
3162	569.989
3163	570.134
3164	570.279
3165	570.424
3166	570.569
3167	570.714
3168	570.858
3169	571.002
3170	571.144
3171	571.286
3172	571.428
3173	571.57
3174	571.712
3175	571.868
3176	572.034
3177	572.2
3178	572.361
3179	572.512
3180	572.663
3181	572.814
3182	572.965
3183	573.118
3184	573.274
3185	573.431
3186	573.588
3187	573.745
3188	573.903
3189	574.062
3190	574.222
3191	574.382
3192	574.542
3193	574.702
3194	574.863
3195	575.023
3196	575.183
3197	575.343
3198	575.503
3199	575.663
3200	575.824
3201	575.984
3202	576.144
3203	576.304
3204	576.464
3205	576.624
3206	576.785
3207	576.945
3208	577.105
3209	577.265
3210	577.427
3211	577.591
3212	577.755
3213	577.918
3214	578.082
3215	578.245
3216	578.409
3217	578.573
3218	578.736
3219	578.9
3220	579.063
3221	579.201
3222	579.325
3223	579.469
3224	579.622
3225	579.776
3226	579.929
3227	580.083
3228	580.236
3229	580.39
3230	580.543
3231	580.697
3232	580.85
3233	581.004
3234	581.157
3235	581.325
3236	581.503
3237	581.661
3238	581.805
3239	581.941
3240	582.078
3241	582.215
3242	582.351
3243	582.488
3244	582.625
3245	582.781
3246	582.945
3247	583.109
3248	583.274
3249	583.438
3250	583.602
3251	583.766
3252	583.93
3253	584.095
3254	584.259
3255	584.423
3256	584.587
3257	584.751
3258	584.916
3259	585.08
3260	585.244
3261	585.405
3262	585.562
3263	585.72
3264	585.877
3265	586.034
3266	586.192
3267	586.349
3268	586.507
3269	586.664
3270	586.822
3271	586.979
3272	587.137
3273	587.294
3274	587.452
3275	587.609
3276	587.766
3277	587.924
3278	588.081
3279	588.239
3280	588.396
3281	588.554
3282	588.705
3283	588.852
3284	588.999
3285	589.145
3286	589.292
3287	589.439
3288	589.585
3289	589.732
3290	589.879
3291	590.026
3292	590.172
3293	590.324
3294	590.48
3295	590.636
3296	590.792
3297	590.948
3298	591.104
3299	591.26
3300	591.415
3301	591.571
3302	591.727
3303	591.883
3304	592.039
3305	592.195
3306	592.351
3307	592.507
3308	592.663
3309	592.819
3310	592.975
3311	593.13
3312	593.286
3313	593.442
3314	593.598
3315	593.754
3316	593.909
3317	594.062
3318	594.216
3319	594.37
3320	594.524
3321	594.678
3322	594.832
3323	594.986
3324	595.139
3325	595.297
3326	595.463
3327	595.64
3328	595.816
3329	595.992
3330	596.168
3331	596.345
3332	596.495
3333	596.633
3334	596.77
3335	596.935
3336	597.119
3337	597.289
3338	597.438
3339	597.588
3340	597.737
3341	597.887
3342	598.037
3343	598.186
3344	598.336
3345	598.486
3346	598.635
3347	598.785
3348	598.934
3349	599.084
3350	599.234
3351	599.383
3352	599.533
3353	599.683
3354	599.832
3355	599.982
3356	600.131
3357	600.281
3358	600.431
3359	600.579
3360	600.727
3361	600.874
3362	601.021
3363	601.169
3364	601.316
3365	601.463
3366	601.611
3367	601.758
3368	601.906
3369	602.053
3370	602.2
3371	602.348
3372	602.495
3373	602.642
3374	602.793
3375	602.946
3376	603.099
3377	603.252
3378	603.405
3379	603.558
3380	603.711
3381	603.863
3382	604.016
3383	604.169
3384	604.322
3385	604.475
3386	604.628
3387	604.783
3388	604.943
3389	605.103
3390	605.262
3391	605.422
3392	605.582
3393	605.742
3394	605.902
3395	606.061
3396	606.221
3397	606.381
3398	606.541
3399	606.701
3400	606.86
3401	607.02
3402	607.18
3403	607.34
3404	607.5
3405	607.643
3406	607.778
3407	607.912
3408	608.047
3409	608.182
3410	608.316
3411	608.451
3412	608.585
3413	608.72
3414	608.854
3415	608.989
3416	609.123
3417	609.258
3418	609.393
3419	609.53
3420	609.67
3421	609.81
3422	609.95
3423	610.089
3424	610.244
3425	610.404
3426	610.564
3427	610.725
3428	610.885
3429	611.045
3430	611.205
3431	611.365
3432	611.525
3433	611.685
3434	611.846
3435	612.006
3436	612.166
3437	612.326
3438	612.486
3439	612.646
3440	612.807
3441	612.967
3442	613.127
3443	613.287
3444	613.447
3445	613.6
3446	613.743
3447	613.887
3448	614.031
3449	614.175
3450	614.318
3451	614.462
3452	614.606
3453	614.749
3454	614.893
3455	615.037
3456	615.181
3457	615.324
3458	615.468
3459	615.621
3460	615.778
3461	615.936
3462	616.094
3463	616.252
3464	616.409
3465	616.567
3466	616.716
3467	616.856
3468	616.995
3469	617.135
3470	617.275
3471	617.415
3472	617.559
3473	617.706
3474	617.852
3475	617.999
3476	618.146
3477	618.292
3478	618.439
3479	618.594
3480	618.753
3481	618.913
3482	619.072
3483	619.231
3484	619.391
3485	619.55
3486	619.709
3487	619.869
3488	620.028
3489	620.188
3490	620.347
3491	620.506
3492	620.666
3493	620.825
3494	620.985
3495	621.144
3496	621.303
3497	621.463
3498	621.622
3499	621.782
3500	621.941
3501	622.1
3502	622.26
3503	622.419
3504	622.579
3505	622.738
3506	622.897
3507	623.057
3508	623.216
3509	623.376
3510	623.535
3511	623.694
3512	623.854
3513	624.013
3514	624.173
3515	624.32
3516	624.457
3517	624.595
3518	624.732
3519	624.869
3520	625.007
3521	625.144
3522	625.281
3523	625.418
3524	625.556
3525	625.693
3526	625.83
3527	625.968
3528	626.105
3529	626.242
3530	626.389
3531	626.54
3532	626.691
3533	626.841
3534	626.992
3535	627.143
3536	627.293
3537	627.444
3538	627.594
3539	627.74
3540	627.883
3541	628.026
3542	628.169
3543	628.3
3544	628.418
3545	628.536
3546	628.672
3547	628.823
3548	628.973
3549	629.124
3550	629.275
3551	629.425
3552	629.576
3553	629.726
3554	629.877
3555	630.028
3556	630.178
3557	630.329
3558	630.48
3559	630.63
3560	630.781
3561	630.932
3562	631.084
3563	631.237
3564	631.39
3565	631.542
3566	631.695
3567	631.848
3568	632.001
3569	632.154
3570	632.307
3571	632.46
3572	632.613
3573	632.766
3574	632.919
3575	633.072
3576	633.225
3577	633.378
3578	633.53
3579	633.683
3580	633.836
3581	633.992
3582	634.15
3583	634.307
3584	634.464
3585	634.622
3586	634.785
3587	634.956
3588	635.127
3589	635.29
3590	635.439
3591	635.588
3592	635.737
3593	635.886
3594	636.035
3595	636.184
3596	636.333
3597	636.482
3598	636.632
3599	636.781
3600	636.93
3601	637.079
3602	637.228
3603	637.377
3604	637.526
3605	637.675
3606	637.824
3607	637.973
3608	638.122
3609	638.271
3610	638.42
3611	638.57
3612	638.719
3613	638.868
3614	639.017
3615	639.166
3616	639.315
3617	639.464
3618	639.613
3619	639.762
3620	639.911
3621	640.06
3622	640.209
3623	640.358
3624	640.508
3625	640.657
3626	640.806
3627	640.955
3628	641.112
3629	641.272
3630	641.432
3631	641.593
3632	641.748
3633	641.899
3634	642.049
3635	642.2
3636	642.35
3637	642.501
3638	642.651
3639	642.802
3640	642.952
3641	643.103
3642	643.253
3643	643.403
3644	643.554
3645	643.704
3646	643.855
3647	644.005
3648	644.157
3649	644.309
3650	644.462
3651	644.614
3652	644.767
3653	644.913
3654	645.048
3655	645.183
3656	645.326
3657	645.477
3658	645.629
3659	645.78
3660	645.931
3661	646.082
3662	646.233
3663	646.385
3664	646.536
3665	646.687
3666	646.838
3667	646.99
3668	647.141
3669	647.292
3670	647.443
3671	647.596
3672	647.75
3673	647.903
3674	648.057
3675	648.21
3676	648.364
3677	648.518
3678	648.671
3679	648.825
3680	648.978
3681	649.129
3682	649.277
3683	649.426
3684	649.574
3685	649.722
3686	649.871
3687	650.019
3688	650.167
3689	650.315
3690	650.464
3691	650.612
3692	650.76
3693	650.908
3694	651.057
3695	651.205
3696	651.353
3697	651.501
3698	651.65
3699	651.798
3700	651.946
3701	652.095
3702	652.243
3703	652.391
3704	652.539
3705	652.688
3706	652.836
3707	652.984
3708	653.132
3709	653.281
3710	653.429
3711	653.577
3712	653.726
3713	653.874
3714	654.022
3715	654.17
3716	654.319
3717	654.467
3718	654.615
3719	654.763
3720	654.912
3721	655.06
3722	655.208
3723	655.368
3724	655.539
3725	655.71
3726	655.881
3727	656.053
3728	656.208
3729	656.348
3730	656.489
3731	656.63
3732	656.77
3733	656.911
3734	657.052
3735	657.193
3736	657.333
3737	657.474
3738	657.615
3739	657.755
3740	657.896
3741	658.037
3742	658.178
3743	658.318
3744	658.459
3745	658.6
3746	658.74
3747	658.881
3748	659.022
3749	659.162
3750	659.303
3751	659.444
3752	659.585
3753	659.725
3754	659.866
3755	660.007
3756	660.147
3757	660.288
3758	660.429
3759	660.57
3760	660.71
3761	660.851
3762	660.992
3763	661.136
3764	661.282
3765	661.429
3766	661.576
3767	661.722
3768	661.869
3769	662.016
3770	662.163
3771	662.309
3772	662.456
3773	662.603
3774	662.749
3775	662.896
3776	663.043
3777	663.19
3778	663.336
3779	663.483
3780	663.63
3781	663.776
3782	663.923
3783	664.07
3784	664.216
3785	664.363
3786	664.51
3787	664.657
3788	664.803
3789	664.95
3790	665.097
3791	665.243
3792	665.39
3793	665.537
3794	665.683
3795	665.83
[truncated: 40 more rows]

## Sheet: 5) Transfer function
column 1	Age, years b2k	GICC21 Ages
column 2	δt,years	Age uncertainty by equation (1) in the paper, to be interpreted as 1 σ.
column 3	Age, years b2k	Corresponding GICC05 Ages
column 4	Years	Age offset (GICC05-GICC21)
GICC21		GICC05	OFFSET
Age, years b2k	δt, years	Age, years b2k	Years
0	2	0	0
1	2	1	0
2	2	2	0
3	2	3	0
4	2	4	0
5	2	5	0
6	2	6	0
7	2	7	0
8	2	8	0
9	2	9	0
10	2	10	0
11	2	11	0
12	2	12	0
13	2	13	0
14	2	14	0
15	2	15	0
16	2	16	0
17	2	17	0
18	2	18	0
19	2	19	0
20	2	20	0
21	2	21	0
22	2	22	0
23	2	23	0
24	2	24	0
25	2	25	0
26	2	26	0
27	2	27	0
28	2	28	0
29	2	29	0
30	2	30	0
31	2	31	0
32	2	32	0
33	2	33	0
34	2	34	0
35	2	35	0
36	2	36	0
37	2	37	0
38	2	38	0
39	2	39	0
40	2	40	0
41	2	41	0
42	2	42	0
43	2	43	0
44	2	44	0
45	2	45	0
46	2	46	0
47	2	47	0
48	2	48	0
49	2	49	0
50	2	50	0
51	2	51	0
52	2	52	0
53	2	53	0
54	2	54	0
55	2	55	0
56	2	56	0
57	2	57	0
58	2	58	0
59	2	59	0
60	2	60	0
61	2	61	0
62	2	62	0
63	2	63	0
64	2	64	0
65	2	65	0
66	2	66	0
67	2	67	0
68	2	68	0
69	2	69	0
70	2	70	0
71	2	71	0
72	2	72	0
73	2	73	0
74	2	74	0
75	2	75	0
76	2	76	0
77	2	77	0
78	2	78	0
79	2	79	0
80	2	80	0
81	2	81	0
82	2	82	0
83	2	83	0
84	2	84	0
85	2	84.6527	-0.347333
86	2	85.3053	-0.694667
87	2	85.958	-1.042
88	2	87.1069	-0.893143
89	2	88.2557	-0.744286
90	2	89.4046	-0.595429
91	2	90.5534	-0.446571
92	2	91.7023	-0.297714
93	2	92.8511	-0.148857
94	2	94	0
95	2	95.0239	0.02395
96	2	96.0479	0.0479
97	2	97.0718	0.07185
98	2	98.0958	0.0958
99	2	99.1197	0.11975
100	2	100.144	0.1437
101	2	101.168	0.16765
102	2	102.192	0.1916
103	2	103.216	0.21555
104	2	104.24	0.2395
105	2	105.329	0.329313
106	2	106.419	0.419125
107	2	107.509	0.508938
108	2	108.599	0.59875
109	2	109.689	0.688563
110	2	110.778	0.778375
111	2	111.868	0.868188
112	2	112.958	0.958
113	2	113.479	0.479
114	2	114	0
115	2	115	0
116	2	116	0
117	2	117	0
118	2	118	0
119	2	119	0
120	2	120	0
121	2	121	0
122	2	122	0
123	2	123	0
124	2	124	0
125	2	125	0
126	2	126	0
127	2	127	0
128	2	128	0
129	2	129	0
130	2	130	0
131	2	131	0
132	2	132	0
133	2	133	0
134	2	134	0
135	2	135	0
136	2	136	0
137	2	137	0
138	2	138	0
139	2	139	0
140	2	140	0
141	2	141	0
142	2	142	0
143	2	143	0
144	2	144	0
145	2	145	0
146	2	146	0
147	2	147	0
148	2	148	0
149	2	149	0
150	2	150	0
151	2	151	0
152	2	152	0
153	2	153	0
154	2	154	0
155	2	155	0
156	2	156	0
157	2	157	0
158	2	158	0
159	2	159	0
160	2	160	0
161	2	161	0
162	2	162	0
163	2	163	0
164	2	164	0
165	2	165	0
166	2	166	0
167	2	167	0
168	2	168	0
169	2	169	0
170	2	170	0
171	2	171	0
172	2	172	0
173	2	173	0
174	2	174	0
175	2	175	0
176	2	176	0
177	2	177	0
178	2	178	0
179	2	179	0
180	2	180	0
181	2	181	0
182	2	182	0
183	2	183	0
184	2	184	0
185	2	185	0
186	2	186	0
187	2	187	0
188	2	188	0
189	2	189	0
190	2	190	0
191	2	191	0
192	2	192	0
193	2	193	0
194	2	194	0
195	2	195	0
196	2	196	0
197	2	197	0
198	2	198	0
199	2	199	0
200	2	200	0
201	2	201	0
202	2	202	0
203	2	203	0
204	2	204	0
205	2	205	0
206	2	206	0
207	2	207	0
208	2	208	0
209	2	209	0
210	2	210	0
211	2	211	0
212	2	212	0
213	2	213	0
214	2	214	0
215	2	215	0
216	2	216	0
217	2	217	0
218	2	218	0
219	2	219	0
220	2	220	0
221	2	221	0
222	2	222	0
223	2	223	0
224	2	224	0
225	2	225	0
226	2	226	0
227	2	227	0
228	2	228	0
229	2	229	0
230	2	230	0
231	2	231	0
232	2	232	0
233	2	233	0
234	2	234	0
235	2	234.975	-0.025
236	2	235.95	-0.05
237	2	236.925	-0.075
238	2	237.9	-0.1
239	2	238.875	-0.125
240	2	239.9	-0.1
241	2	240.925	-0.075
242	2	241.95	-0.05
243	2	242.975	-0.025
244	2	244	0
245	2	244.854	-0.145833
246	2	245.708	-0.291667
247	2	246.562	-0.4375
248	2	247.417	-0.583333
249	2	248.271	-0.729167
250	2	249.125	-0.875
251	2	250.344	-0.65625
252	2	251.562	-0.4375
253	2	252.781	-0.21875
254	2	254	0
255	2	255	0
256	2	256	0
257	2	257	0
258	2	258	0
259	2	259	0
260	2	260	0
261	2	261	0
262	2	262	0
263	2	263	0
264	2	264	0
265	2	264.986	-0.0138889
266	2	265.972	-0.0277778
267	2	266.958	-0.0416667
268	2	267.944	-0.0555556
269	2	268.931	-0.0694444
270	2	269.917	-0.0833333
271	2	270.903	-0.0972222
272	2	271.889	-0.111111
273	2	272.875	-0.125
274	2	274	0
275	2	275	0
276	2	276	0
277	2	277	0
278	2	278	0
279	2	279	0
280	2	280	0
281	2	281	0
282	2	282	0
283	2	283	0
284	2	284	0
285	2	285	0
286	2	286	0
287	2	287	0
288	2	288	0
289	2	289	0
290	2	290	0
291	2	291	0
292	2	292	0
293	2	293	0
294	2	294	0
295	2	295.111	0.111111
296	2	296.222	0.222222
297	2	297.333	0.333333
298	2	298.444	0.444444
299	2	299.556	0.555556
300	2	300.667	0.666667
301	2	301.778	0.777778
302	2	302.889	0.888889
303	2	304	1
304	2	304.909	0.909091
305	2	305.818	0.818182
306	2	306.727	0.727273
307	2	307.636	0.636364
308	2	308.545	0.545455
309	2	309.455	0.454545
310	2	310.364	0.363636
311	2	311.273	0.272727
312	2	312.182	0.181818
313	2	313.091	0.0909091
314	2	314	0
315	2	315	0
316	2	316	0
317	2	317	0
318	2	318	0
319	2	319	0
320	2	320	0
321	2	321	0
322	2	322	0
323	2	323	0
324	2	324	0
325	2	325.018	0.0178571
326	2	326.036	0.0357143
327	2	327.054	0.0535714
328	2	328.071	0.0714286
329	2	329.089	0.0892857
330	2	330.107	0.107143
331	2	331.125	0.125
332	2	332	0
333	2	333	0
334	2	334	0
335	2	335.021	0.021
336	2	336.042	0.042
337	2	337.037	0.03675
338	2	338.031	0.0315
339	2	339.026	0.02625
340	2	340.021	0.021
341	2	341.016	0.01575
342	2	342.01	0.0105
343	2	343.005	0.00525
344	2	344	0
345	2	345.111	0.111111
346	2	346.222	0.222222
347	2	347.333	0.333333
348	2	348.444	0.444444
349	2	349.556	0.555556
350	2	350.667	0.666667
351	2	351.778	0.777778
352	2	352.889	0.888889
353	2	354	1
354	2	354	0
355	2	354.969	-0.03125
356	2	355.938	-0.0625
357	2	356.906	-0.09375
358	2	357.875	-0.125
359	2	358.875	-0.125
360	2	359.9	-0.1
361	2	360.925	-0.075
362	2	361.95	-0.05
363	2	362.975	-0.025
364	2	364	0
365	2	365.025	0.025
366	2	366.05	0.05
367	2	367.075	0.075
368	2	368.1	0.1
369	2	369.125	0.125
370	2	371.562	1.5625
371	2	374	3
372	2	374.848	2.8479
373	2	375.696	2.6958
374	2	376.544	2.5437
375	2	377.392	2.3916
376	2	378.24	2.2395
377	2	379.087	2.0874
378	2	379.935	1.9353
379	2	380.783	1.7832
380	2	381.631	1.6311
381	2	382.479	1.479
382	2	383.526	1.52636
383	2	384.574	1.57373
384	2	385.621	1.62109
385	2	386.668	1.66845
386	2	387.716	1.71582
387	2	388.763	1.76318
388	2	389.811	1.81055
389	2	390.858	1.85791
390	2	391.905	1.90527
391	2	392.953	1.95264
392	2	394	2
393	2	394	1
394	2	394	0
395	2	395.062	0.0625
396	2	396.125	0.125
397	2	397.438	0.4375
398	2	398.75	0.75
399	2	400.062	1.0625
400	2	401.375	1.375
401	2	402.688	1.6875
402	2	404	2
403	2	404	1
404	2	404	0
405	2	405.042	0.042
406	2	406.162	0.16175
407	2	407.281	0.2815
408	2	408.401	0.40125
409	2	409.521	0.521
410	2	410.641	0.64075
411	2	411.76	0.7605
412	2	412.88	0.88025
413	2	414	1
414	2	414	0
415	2	415.111	0.111111
416	2	416.222	0.222222
417	2	417.333	0.333333
418	2	418.444	0.444444
419	2	419.556	0.555556
420	2	420.667	0.666667
421	2	421.778	0.777778
422	2	422.889	0.888889
423	2	424	1
424	2	424	0
425	2	425.008	0.0084
426	2	426.017	0.0168
427	2	427.025	0.0252
428	2	428.034	0.0336
429	2	429.042	0.042
430	2	430.281	0.2815
431	2	431.521	0.521
432	2	432.76	0.7605
433	2	434	1
434	2	434	0
435	2	435.111	0.111111
436	2	436.222	0.222222
437	2	437.333	0.333333
438	2	438.444	0.444444
439	2	439.556	0.555556
440	2	440.667	0.666667
441	2	441.778	0.777778
442	2	442.889	0.888889
443	2	444	1
444	2	444.863	0.863143
445	2	445.726	0.726286
446	2	446.589	0.589429
447	2	447.453	0.452571
448	2	448.316	0.315714
449	2	449.179	0.178857
450	2	450.042	0.042
451	2	451.031	0.0315
452	2	452.021	0.021
453	2	453.01	0.0105
454	2	454	0
455	2	454.982	-0.0178571
456	2	455.964	-0.0357143
457	2	456.946	-0.0535714
458	2	457.929	-0.0714286
459	2	458.911	-0.0892857
460	2	459.893	-0.107143
461	2	460.875	-0.125
462	2	462.438	0.4375
463	2	464	1
464	2	464	0
465	2	465.111	0.111111
466	2	466.222	0.222222
467	2	467.333	0.333333
468	2	468.444	0.444444
469	2	469.556	0.555556
470	2	470.667	0.666667
471	2	471.778	0.777778
472	2	472.889	0.888889
473	2	474	1
474	2	474.653	0.652667
475	2	475.305	0.305333
476	2	475.958	-0.042
477	2	476.963	-0.03675
478	2	477.969	-0.0315
479	2	478.974	-0.02625
480	2	479.979	-0.021
481	2	480.984	-0.01575
482	2	481.99	-0.0105
483	2	482.995	-0.00525
484	2	484	0
485	2	484.993	-0.007
486	2	485.986	-0.014
487	2	486.979	-0.021
488	2	487.972	-0.028
489	2	488.965	-0.035
490	2	489.958	-0.042
491	2	490.969	-0.0315
492	2	491.979	-0.021
493	2	492.99	-0.0105
494	2	494	0
495	2	495.111	0.111111
496	2	496.222	0.222222
497	2	497.333	0.333333
498	2	498.444	0.444444
499	2	499.556	0.555556
500	2	500.667	0.666667
501	2	501.778	0.777778
502	2	502.889	0.888889
503	2	504	1
504	2	505	1
505	2	506	1
506	2	507	1
507	2	508	1
508	2	509	1
509	2	510	1
510	2	511	1
511	2	512	1
512	2	513	1
513	2	514	1
514	2	514	0
515	2	514.979	-0.021
516	2	515.958	-0.042
517	2	517.107	0.106857
518	2	518.256	0.255714
519	2	519.405	0.404571
520	2	520.553	0.553429
521	2	521.702	0.702286
522	2	522.851	0.851143
523	2	524	1
524	2	524.851	0.851143
525	2	525.702	0.702286
526	2	526.553	0.553429
527	2	527.405	0.404571
528	2	528.256	0.255714
529	2	529.107	0.106857
530	2	529.958	-0.042
531	2	531	0
532	2	532.042	0.042
533	2	534	1
534	2	534.913	0.9125
535	2	535.825	0.825
536	2	536.737	0.7375
537	2	537.65	0.65
538	2	538.562	0.5625
539	2	539.475	0.475
540	2	540.388	0.3875
541	2	541.3	0.3
542	2	542.212	0.2125
543	2	543.125	0.125
544	2	544	0
545	2	544.997	-0.0028
546	2	545.994	-0.0056
547	2	546.992	-0.0084
548	2	547.989	-0.0112
549	2	548.986	-0.014
550	2	549.983	-0.0168
551	2	550.98	-0.0196
552	2	551.978	-0.0224
553	2	552.975	-0.0252
554	2	553.972	-0.028
555	2	554.969	-0.0308
556	2	555.966	-0.0336
557	2	556.964	-0.0364
558	2	557.961	-0.0392
559	2	558.958	-0.042
560	2	559.966	-0.0336
561	2	560.975	-0.0252
562	2	561.983	-0.0168
563	2	562.992	-0.0084
564	2	564	0
565	2	565	0
566	2	566	0
567	2	567	0
568	2	568	0
569	2	569	0
570	2	570	0
571	2	571	0
572	2	572	0
573	2	573	0
574	2	574	0
575	2	575	0
576	2	576	0
577	2	577	0
578	2	578	0
579	2	579	0
580	2	580	0
581	2	581	0
582	2	582	0
583	2	583	0
584	2	584	0
585	2	584	-1
586	2	585.175	-0.825
587	2	586.35	-0.65
588	2	587.525	-0.475
589	2	588.7	-0.3
590	2	589.875	-0.125
591	2	590.7	-0.3
592	2	591.525	-0.475
593	2	592.35	-0.65
594	2	593.175	-0.825
595	2	594	-1
596	2	595.095	-0.905273
597	2	596.189	-0.810545
598	2	597.284	-0.715818
599	2	598.379	-0.621091
600	2	599.474	-0.526364
601	2	600.568	-0.431636
602	2	601.663	-0.336909
603	2	602.758	-0.242182
604	2	603.853	-0.147455
605	2	604.947	-0.0527273
606	2	606.042	0.042
607	2	607.037	0.03675
608	2	608.032	0.0315
609	2	609.026	0.02625
610	2	610.021	0.021
611	2	611.016	0.01575
612	2	612.01	0.0105
613	2	613.005	0.00525
614	2	614	0
615	2	615	0
616	2	616	0
617	2	617	0
618	2	618	0
619	2	619	0
620	2	620	0
621	2	621	0
622	2	622	0
623	2	623	0
624	2	624	0
625	2	625	0
626	2	626	0
627	2	627	0
628	2	628	0
629	2	629	0
630	2	630	0
631	2	631	0
632	2	632	0
633	2	633	0
634	2	634	0
635	2	635	0
636	2	636	0
637	2	637	0
638	2	638	0
639	2	639	0
640	2	640	0
641	2	641	0
642	2	642	0
643	2	643	0
644	2	644	0
645	2	645	0
646	2	646	0
647	2	647	0
648	2	648	0
649	2	649	0
650	2	650	0
651	2	651	0
652	2	652	0
653	2	653	0
654	2	654	0
655	2	654	-1
656	2	655.111	-0.888889
657	2	656.222	-0.777778
658	2	657.333	-0.666667
659	2	658.444	-0.555556
660	2	659.556	-0.444444
661	2	660.667	-0.333333
662	2	661.778	-0.222222
663	2	662.889	-0.111111
664	2	664	0
665	2	664	-1
666	2	665.111	-0.888889
667	2	666.222	-0.777778
668	2	667.333	-0.666667
669	2	668.444	-0.555556
670	2	669.556	-0.444444
671	2	670.667	-0.333333
672	2	671.778	-0.222222
673	2	672.889	-0.111111
674	2	674	0
675	2	675	0
676	2	676	0
677	2	677	0
678	2	678	0
679	2	679	0
680	2	680	0
681	2	681	0
682	2	682	0
683	2	683	0
684	2	684	0
685	2	685	0
686	2	686	0
687	2	687	0
688	2	688	0
689	2	689	0
690	2	690	0
691	2	691	0
692	2	692	0
693	2	693	0
694	2	694	0
695	2	695	0
696	2	696	0
697	2	697	0
698	2	698	0
699	2	699	0
700	2	700	0
701	2	701	0
702	2	702	0
703	2	703	0
704	2	704	0
705	2	705	0
706	2	706	0
707	2	707	0
708	2	708	0
709	2	709	0
710	2	710	0
711	2	711	0
712	2	712	0
713	2	713	0
714	2	714	0
715	2	715	0
716	2	716	0
717	2	717	0
718	2	718	0
719	2	719	0
720	2	720	0
721	2	721	0
722	2	722	0
723	2	723	0
724	2	724	0
725	2	725	0
726	2	726	0
727	2	727	0
728	2	728	0
729	2	729	0
730	2	730	0
731	2	731	0
732	2	732	0
733	2	733	0
734	2	734	0
735	2	735	0
736	2	736	0
737	2	737	0
738	2	738	0
739	2	739	0
740	2	740	0
741	2	741	0
742	2	742	0
743	2.1	743	0
744	2.14142	744	0
745	2.17321	745	0
746	2.2	746	0
747	2.22361	747	0
748	2.24495	748	0
749	2.26458	749	0
750	2.28284	750	0
751	2.3	751	0
752	2.31623	752	0
753	2.33166	753	0
754	2.34641	754	0
755	2.36056	754	-1
756	2.37417	755.25	-0.75
757	2.3873	756.5	-0.5
758	2.4	757.75	-0.25
759	2.41231	759	0
760	2.42426	760.25	0.25
761	2.43589	761.5	0.5
762	2.44721	762.75	0.75
763	2.45826	764	1
764	2.46904	764	0
765	2.47958	764	-1
766	2.4899	765.25	-0.75
767	2.5	766.5	-0.5
768	2.5099	767.75	-0.25
769	2.51962	769	0
770	2.52915	770.25	0.25
771	2.53852	771.5	0.5
772	2.54772	772.75	0.75
773	2.55678	774	1
774	2.56569	774	0
775	2.57446	774	-1
776	2.5831	775.111	-0.888889
777	2.59161	776.222	-0.777778
778	2.6	777.333	-0.666667
779	2.60828	778.444	-0.555556
780	2.61644	779.556	-0.444444
781	2.6245	780.667	-0.333333
782	2.63246	781.778	-0.222222
783	2.64031	782.889	-0.111111
784	2.64807	784	0
785	2.65574	785.25	0.25
786	2.66332	786.5	0.5
787	2.67082	787.75	0.75
788	2.67823	789	1
789	2.68557	790.25	1.25
790	2.69282	791.5	1.5
791	2.7	792.75	1.75
792	2.70711	794	2
793	2.71414	794	1
794	2.72111	794	0
795	2.72801	795.429	0.428571
796	2.73485	796.857	0.857143
797	2.74162	798.286	1.28571
798	2.74833	799.714	1.71429
799	2.75498	801.143	2.14286
800	2.76158	802.571	2.57143
801	2.76811	804	3
802	2.7746	804	2
803	2.78102	804	1
804	2.7874	805.25	1.25
805	2.79373	806.5	1.5
806	2.8	807.75	1.75
807	2.80623	809	2
808	2.8124	810.25	2.25
809	2.81854	811.5	2.5
810	2.82462	812.75	2.75
811	2.83066	814	3
812	2.83666	815	3
813	2.84261	816	3
814	2.84853	817	3
815	2.8544	818	3
816	2.86023	819	3
817	2.86603	820	3
818	2.87178	821	3
819	2.8775	822	3
820	2.88318	823	3
821	2.88882	824	3
822	2.89443	824.909	2.90909
823	2.9	825.818	2.81818
824	2.90554	826.727	2.72727
825	2.91104	827.636	2.63636
826	2.91652	828.545	2.54545
827	2.92195	829.455	2.45455
828	2.92736	830.364	2.36364
829	2.93274	831.273	2.27273
830	2.93808	832.182	2.18182
831	2.9434	833.091	2.09091
832	2.94868	834	2
833	2.95394	834.909	1.90909
834	2.95917	835.818	1.81818
835	2.96437	836.727	1.72727
836	2.96954	837.636	1.63636
837	2.97468	838.545	1.54545
838	2.9798	839.455	1.45455
839	2.98489	840.364	1.36364
840	2.98995	841.273	1.27273
841	2.99499	842.182	1.18182
842	3	843.091	1.09091
843	3.00499	844	1
844	3.00995	845	1
845	3.01489	846	1
846	3.0198	847	1
847	3.0247	848	1
848	3.02956	849	1
849	3.03441	850	1
850	3.03923	851	1
851	3.04403	852	1
852	3.04881	853	1
853	3.05357	854	1
854	3.0583	855.25	1.25
855	3.06301	856.5	1.5
856	3.06771	857.75	1.75
857	3.07238	859	2
858	3.07703	860.25	2.25
859	3.08167	861.5	2.5
860	3.08628	862.75	2.75
861	3.09087	864	3
862	3.09545	864	2
863	3.1	864	1
864	3.10454	865	1
865	3.10905	866	1
866	3.11355	867	1
867	3.11803	868	1
868	3.1225	869	1
869	3.12694	870	1
870	3.13137	871	1
871	3.13578	872	1
872	3.14018	873	1
873	3.14455	874	1
874	3.14891	875.429	1.42857
875	3.15326	876.857	1.85714
876	3.15758	878.286	2.28571
877	3.1619	879.714	2.71429
878	3.16619	881.143	3.14286
879	3.17047	882.571	3.57143
880	3.17473	884	4
881	3.17898	884	3
882	3.18322	884	2
883	3.18743	884	1
884	3.19164	885	1
885	3.19583	886	1
886	3.2	887	1
887	3.20416	888	1
888	3.2083	889	1
889	3.21244	890	1
890	3.21655	891	1
891	3.22066	892	1
892	3.22474	893	1
893	3.22882	894	1
894	3.23288	895.429	1.42857
895	3.23693	896.857	1.85714
896	3.24097	898.286	2.28571
897	3.24499	899.714	2.71429
898	3.249	901.143	3.14286
899	3.253	902.571	3.57143
900	3.25698	904	4
901	3.26095	904	3
902	3.26491	904	2
903	3.26886	905	2
904	3.27279	906	2
905	3.27671	907	2
906	3.28062	908	2
907	3.28452	909	2
908	3.28841	910	2
909	3.29228	911	2
910	3.29615	912	2
911	3.3	913	2
912	3.30384	914	2
913	3.30767	915.111	2.11111
914	3.31149	916.222	2.22222
915	3.31529	917.333	2.33333
916	3.31909	918.444	2.44444
917	3.32288	919.556	2.55556
918	3.32665	920.667	2.66667
919	3.33041	921.778	2.77778
920	3.33417	922.889	2.88889
921	3.33791	924	3
922	3.34164	925.111	3.11111
923	3.34536	926.222	3.22222
924	3.34907	927.333	3.33333
925	3.35277	928.444	3.44444
926	3.35647	929.556	3.55556
927	3.36015	930.667	3.66667
928	3.36382	931.778	3.77778
929	3.36748	932.889	3.88889
930	3.37113	934	4
931	3.37477	934	3
932	3.3784	934	2
933	3.38203	935.111	2.11111
934	3.38564	936.222	2.22222
935	3.38924	937.333	2.33333
936	3.39284	938.444	2.44444
937	3.39642	939.556	2.55556
938	3.4	940.667	2.66667
939	3.40357	941.778	2.77778
940	3.40712	942.889	2.88889
941	3.41067	944	3
942	3.41421	945.111	3.11111
943	3.41774	946.222	3.22222
944	3.42127	947.333	3.33333
945	3.42478	948.444	3.44444
946	3.42829	949.556	3.55556
947	3.43178	950.667	3.66667
948	3.43527	951.778	3.77778
949	3.43875	952.889	3.88889
950	3.44222	954	4
951	3.44568	954	3
952	3.44914	955	3
953	3.45258	956	3
954	3.45602	957	3
955	3.45945	958	3
956	3.46287	959	3
957	3.46629	960	3
958	3.46969	961	3
959	3.47309	962	3
960	3.47648	963	3
961	3.47986	964	3
962	3.48324	966.042	4.042
963	3.48661	967.458	4.4585
964	3.48997	968.875	4.875
965	3.49332	969.729	4.72917
966	3.49666	970.583	4.58333
967	3.5	971.438	4.4375
968	3.50333	972.292	4.29167
969	3.50665	973.146	4.14583
970	3.50997	974	4
971	3.51327	975.111	4.11111
972	3.51658	976.222	4.22222
973	3.51987	977.333	4.33333
974	3.52315	978.444	4.44444
975	3.52643	979.556	4.55556
976	3.52971	980.667	4.66667
977	3.53297	981.778	4.77778
978	3.53623	982.889	4.88889
979	3.53948	984	5
980	3.54272	985	5
981	3.54596	986	5
982	3.54919	987	5
983	3.55242	988	5
984	3.55563	989	5
985	3.55885	990	5
986	3.56205	991	5
987	3.56525	992	5
988	3.56844	993	5
989	3.57162	994	5
990	3.5748	995	5
991	3.57797	996	5
992	3.58114	997	5
993	3.5843	998	5
994	3.58745	999	5
995	3.5906	1000	5
996	3.59374	1001	5
997	3.59687	1002	5
998	3.6	1003	5
999	3.60312	1004	5
1000	3.60624	1005.11	5.11111
1001	3.60935	1006.22	5.22222
1002	3.61245	1007.33	5.33333
1003	3.61555	1008.44	5.44444
1004	3.61864	1009.56	5.55556
1005	3.62173	1010.67	5.66667
1006	3.62481	1011.78	5.77778
1007	3.62788	1012.89	5.88889
1008	3.63095	1014	6
1009	3.63401	1014	5
1010	3.63707	1015.11	5.11111
1011	3.64012	1016.22	5.22222
1012	3.64317	1017.33	5.33333
1013	3.64621	1018.44	5.44444
1014	3.64924	1019.56	5.55556
1015	3.65227	1020.67	5.66667
1016	3.65529	1021.78	5.77778
1017	3.65831	1022.89	5.88889
1018	3.66132	1024	6
1019	3.66433	1025	6
1020	3.66733	1026	6
1021	3.67033	1027	6
1022	3.67332	1028	6
1023	3.67631	1029	6
1024	3.67929	1030	6
1025	3.68226	1031	6
1026	3.68523	1032	6
1027	3.68819	1033	6
1028	3.69115	1034	6
1029	3.69411	1035	6
1030	3.69706	1036	6
1031	3.7	1037	6
1032	3.70294	1038	6
1033	3.70587	1039	6
1034	3.7088	1040	6
1035	3.71172	1041	6
1036	3.71464	1042	6
1037	3.71756	1043	6
1038	3.72047	1044	6
1039	3.72337	1045	6
1040	3.72627	1046	6
1041	3.72916	1047	6
1042	3.73205	1048	6
1043	3.73494	1049	6
1044	3.73781	1050	6
1045	3.74069	1051	6
1046	3.74356	1052	6
1047	3.74642	1053	6
1048	3.74929	1054	6
1049	3.75214	1055	6
1050	3.75499	1056	6
1051	3.75784	1057	6
1052	3.76068	1058	6
1053	3.76352	1059	6
1054	3.76635	1060	6
1055	3.76918	1061	6
1056	3.772	1062	6
1057	3.77482	1063	6
1058	3.77764	1064	6
1059	3.78045	1065.07	6.06543
1060	3.78326	1066.13	6.13086
1061	3.78606	1067.2	6.19629
1062	3.78885	1068.26	6.26171
1063	3.79165	1069.33	6.32714
1064	3.79444	1070.39	6.39257
1065	3.79722	1071.46	6.458
1066	3.8	1072.31	6.30533
1067	3.80278	1073.15	6.15267
1068	3.80555	1074	6
1069	3.80831	1075	6
1070	3.81108	1076	6
1071	3.81384	1077	6
1072	3.81659	1078	6
1073	3.81934	1079	6
1074	3.82209	1080	6
1075	3.82483	1081	6
1076	3.82757	1082	6
1077	3.8303	1083	6
1078	3.83303	1084	6
1079	3.83576	1085	6
1080	3.83848	1086	6
1081	3.8412	1087	6
1082	3.84391	1088	6
1083	3.84662	1089	6
1084	3.84932	1090	6
1085	3.85203	1091	6
1086	3.85472	1092	6
1087	3.85742	1093	6
1088	3.86011	1094	6
1089	3.86279	1095	6
1090	3.86548	1096	6
1091	3.86815	1097	6
1092	3.87083	1098	6
1093	3.8735	1099	6
1094	3.87617	1100	6
1095	3.87883	1101	6
1096	3.88149	1102	6
1097	3.88414	1103	6
1098	3.8868	1104	6
1099	3.88944	1105.11	6.11111
1100	3.89209	1106.22	6.22222
1101	3.89473	1107.33	6.33333
1102	3.89737	1108.44	6.44444
1103	3.9	1109.56	6.55556
1104	3.90263	1110.67	6.66667
1105	3.90526	1111.78	6.77778
1106	3.90788	1112.89	6.88889
1107	3.9105	1114	7
1108	3.91311	1115	7
1109	3.91572	1116	7
1110	3.91833	1117	7
1111	3.92094	1118	7
1112	3.92354	1119	7
1113	3.92614	1120	7
1114	3.92873	1121	7
1115	3.93132	1122	7
1116	3.93391	1123	7
1117	3.93649	1124	7
1118	3.93907	1125	7
1119	3.94165	1126	7
1120	3.94422	1127	7
1121	3.94679	1128	7
1122	3.94936	1129	7
1123	3.95192	1130	7
1124	3.95448	1131	7
1125	3.95704	1132	7
1126	3.95959	1133	7
1127	3.96214	1134	7
1128	3.96469	1135	7
1129	3.96723	1136	7
1130	3.96977	1137	7
1131	3.97231	1138	7
1132	3.97484	1139	7
1133	3.97737	1140	7
1134	3.9799	1141	7
1135	3.98242	1142	7
1136	3.98494	1143	7
1137	3.98746	1144	7
1138	3.98997	1144	6
1139	3.99249	1145.11	6.11111
1140	3.99499	1146.22	6.22222
1141	3.9975	1147.33	6.33333
1142	4	1148.44	6.44444
1143	4.0025	1149.56	6.55556
1144	4.00499	1150.67	6.66667
1145	4.00749	1151.78	6.77778
1146	4.00998	1152.89	6.88889
1147	4.01246	1154	7
1148	4.01494	1154	6
1149	4.01742	1155.11	6.11111
1150	4.0199	1156.22	6.22222
1151	4.02237	1157.33	6.33333
1152	4.02485	1158.44	6.44444
1153	4.02731	1159.56	6.55556
1154	4.02978	1160.67	6.66667
1155	4.03224	1161.78	6.77778
1156	4.0347	1162.89	6.88889
1157	4.03715	1164	7
1158	4.03961	1164	6
1159	4.04206	1165.11	6.11111
1160	4.0445	1166.22	6.22222
1161	4.04695	1167.33	6.33333
1162	4.04939	1168.44	6.44444
1163	4.05183	1169.56	6.55556
1164	4.05426	1170.67	6.66667
1165	4.0567	1171.78	6.77778
1166	4.05913	1172.89	6.88889
1167	4.06155	1174	7
1168	4.06398	1174	6
1169	4.0664	1175	6
1170	4.06882	1176	6
1171	4.07123	1177	6
1172	4.07364	1178	6
1173	4.07605	1179	6
1174	4.07846	1180	6
1175	4.08087	1181	6
1176	4.08327	1182	6
1177	4.08567	1183	6
1178	4.08806	1184	6
1179	4.09045	1185	6
1180	4.09284	1186	6
1181	4.09523	1187	6
1182	4.09762	1188	6
1183	4.1	1189	6
1184	4.10238	1190	6
1185	4.10476	1191	6
1186	4.10713	1192	6
1187	4.1095	1193	6
1188	4.11187	1194	6
1189	4.11424	1195.08	6.07743
1190	4.1166	1196.15	6.15486
1191	4.11896	1197.23	6.23229
1192	4.12132	1198.31	6.30971
1193	4.12368	1199.39	6.38714
1194	4.12603	1200.46	6.46457
1195	4.12838	1201.54	6.542
1196	4.13073	1202.36	6.36133
1197	4.13307	1203.18	6.18067
1198	4.13542	1204	6
1199	4.13776	1205	6
1200	4.14009	1206	6
1201	4.14243	1207	6
1202	4.14476	1208	6
1203	4.14709	1209	6
1204	4.14942	1210	6
1205	4.15174	1211	6
1206	4.15407	1212	6
1207	4.15639	1213	6
1208	4.1587	1214	6
1209	4.16102	1215	6
1210	4.16333	1216	6
1211	4.16564	1217	6
1212	4.16795	1218	6
1213	4.17025	1219	6
1214	4.17256	1220	6
1215	4.17486	1221	6
1216	4.17715	1222	6
1217	4.17945	1223	6
1218	4.18174	1224	6
1219	4.18403	1225	6
1220	4.18632	1226	6
1221	4.18861	1227	6
1222	4.19089	1228	6
1223	4.19317	1229	6
1224	4.19545	1230	6
1225	4.19773	1231	6
1226	4.2	1232	6
1227	4.20227	1233	6
1228	4.20454	1234	6
1229	4.20681	1235	6
1230	4.20907	1236	6
1231	4.21133	1237	6
1232	4.21359	1238	6
1233	4.21585	1239	6
1234	4.21811	1240	6
1235	4.22036	1241	6
1236	4.22261	1242	6
1237	4.22486	1243	6
1238	4.22711	1244	6
1239	4.22935	1245	6
1240	4.23159	1246	6
1241	4.23383	1247	6
1242	4.23607	1248	6
1243	4.2383	1249	6
1244	4.24054	1250	6
1245	4.24277	1251	6
1246	4.24499	1252	6
1247	4.24722	1253	6
1248	4.24944	1254	6
1249	4.25167	1255	6
1250	4.25389	1256	6
1251	4.2561	1257	6
1252	4.25832	1258	6
1253	4.26053	1259	6
1254	4.26274	1260	6
1255	4.26495	1261	6
1256	4.26716	1262	6
1257	4.26936	1263	6
1258	4.27156	1264	6
1259	4.27376	1265	6
1260	4.27596	1266	6
1261	4.27816	1267	6
1262	4.28035	1268	6
1263	4.28254	1269	6
1264	4.28473	1270	6
1265	4.28692	1271	6
1266	4.2891	1272	6
1267	4.29129	1273	6
1268	4.29347	1274	6
1269	4.29565	1275.11	6.11111
1270	4.29783	1276.22	6.22222
1271	4.3	1277.33	6.33333
1272	4.30217	1278.44	6.44444
1273	4.30434	1279.56	6.55556
1274	4.30651	1280.67	6.66667
1275	4.30868	1281.78	6.77778
1276	4.31084	1282.89	6.88889
1277	4.31301	1284	7
1278	4.31517	1284	6
1279	4.31733	1285	6
1280	4.31948	1286	6
1281	4.32164	1287	6
1282	4.32379	1288	6
1283	4.32594	1289	6
1284	4.32809	1290	6
1285	4.33024	1291	6
1286	4.33238	1292	6
1287	4.33452	1293	6
1288	4.33666	1294	6
1289	4.3388	1295	6
1290	4.34094	1296	6
1291	4.34307	1297	6
1292	4.34521	1298	6
1293	4.34734	1299	6
1294	4.34947	1300	6
1295	4.3516	1301	6
1296	4.35372	1302	6
1297	4.35584	1303	6
1298	4.35797	1304	6
1299	4.36008	1305	6
1300	4.3622	1306	6
1301	4.36432	1307	6
1302	4.36643	1308	6
1303	4.36854	1309	6
1304	4.37065	1310	6
1305	4.37276	1311	6
1306	4.37487	1312	6
1307	4.37697	1313	6
1308	4.37908	1314	6
1309	4.38118	1315.11	6.11111
1310	4.38328	1316.22	6.22222
1311	4.38537	1317.33	6.33333
1312	4.38747	1318.44	6.44444
1313	4.38956	1319.56	6.55556
1314	4.39165	1320.67	6.66667
1315	4.39374	1321.78	6.77778
1316	4.39583	1322.89	6.88889
1317	4.39792	1324	7
1318	4.4	1325	7
1319	4.40208	1326	7
1320	4.40416	1327	7
1321	4.40624	1328	7
1322	4.40832	1329	7
1323	4.41039	1330	7
1324	4.41247	1331	7
1325	4.41454	1332	7
1326	4.41661	1333	7
1327	4.41868	1334	7
1328	4.42074	1334	6
1329	4.42281	1335.52	6.521
1330	4.42487	1337.04	7.042
1331	4.42693	1337.91	6.91175
1332	4.42899	1338.78	6.7815
1333	4.43105	1339.65	6.65125
1334	4.43311	1340.52	6.521
1335	4.43516	1341.39	6.39075
1336	4.43721	1342.26	6.2605
1337	4.43926	1343.13	6.13025
1338	4.44131	1344	6
1339	4.44336	1345.11	6.11111
1340	4.4454	1346.22	6.22222
1341	4.44745	1347.33	6.33333
1342	4.44949	1348.44	6.44444
1343	4.45153	1349.56	6.55556
1344	4.45357	1350.67	6.66667
1345	4.45561	1351.78	6.77778
1346	4.45764	1352.89	6.88889
1347	4.45967	1354	7
1348	4.46171	1354	6
1349	4.46374	1355.11	6.11111
1350	4.46577	1356.22	6.22222
1351	4.46779	1357.33	6.33333
1352	4.46982	1358.44	6.44444
1353	4.47184	1359.56	6.55556
1354	4.47386	1360.67	6.66667
1355	4.47588	1361.78	6.77778
1356	4.4779	1362.89	6.88889
1357	4.47992	1364	7
1358	4.48193	1364	6
1359	4.48395	1365.11	6.11111
1360	4.48596	1366.22	6.22222
1361	4.48797	1367.33	6.33333
1362	4.48998	1368.44	6.44444
1363	4.49199	1369.56	6.55556
1364	4.49399	1370.67	6.66667
1365	4.496	1371.78	6.77778
1366	4.498	1372.89	6.88889
1367	4.5	1374	7
1368	4.502	1374	6
1369	4.504	1375.11	6.11111
1370	4.50599	1376.22	6.22222
1371	4.50799	1377.33	6.33333
1372	4.50998	1378.44	6.44444
1373	4.51197	1379.56	6.55556
1374	4.51396	1380.67	6.66667
1375	4.51595	1381.78	6.77778
1376	4.51794	1382.89	6.88889
1377	4.51992	1384	7
1378	4.5219	1384	6
1379	4.52389	1385.11	6.11111
1380	4.52587	1386.22	6.22222
1381	4.52784	1387.33	6.33333
1382	4.52982	1388.44	6.44444
1383	4.5318	1389.56	6.55556
1384	4.53377	1390.67	6.66667
1385	4.53574	1391.78	6.77778
1386	4.53772	1392.89	6.88889
1387	4.53969	1394	7
1388	4.54165	1394	6
1389	4.54362	1395.11	6.11111
1390	4.54558	1396.22	6.22222
1391	4.54755	1397.33	6.33333
1392	4.54951	1398.44	6.44444
1393	4.55147	1399.56	6.55556
1394	4.55343	1400.67	6.66667
1395	4.55539	1401.78	6.77778
1396	4.55734	1402.89	6.88889
1397	4.5593	1404	7
1398	4.56125	1405	7
1399	4.5632	1406	7
1400	4.56515	1407	7
1401	4.5671	1408	7
1402	4.56905	1409	7
1403	4.57099	1410	7
1404	4.57294	1411	7
1405	4.57488	1412	7
1406	4.57682	1413	7
1407	4.57876	1414	7
1408	4.5807	1415	7
1409	4.58263	1416	7
1410	4.58457	1417	7
1411	4.5865	1418	7
1412	4.58844	1419	7
1413	4.59037	1420	7
1414	4.5923	1421	7
1415	4.59422	1422	7
1416	4.59615	1423	7
1417	4.59808	1424	7
1418	4.6	1425	7
1419	4.60192	1426	7
1420	4.60384	1427	7
1421	4.60576	1428	7
1422	4.60768	1429	7
1423	4.6096	1430	7
1424	4.61151	1431	7
1425	4.61343	1432	7
1426	4.61534	1433	7
1427	4.61725	1434	7
1428	4.61916	1435	7
1429	4.62107	1436	7
1430	4.62298	1437	7
1431	4.62488	1438	7
1432	4.62679	1439	7
1433	4.62869	1440	7
1434	4.63059	1441	7
1435	4.63249	1442	7
1436	4.63439	1443	7
1437	4.63629	1444	7
1438	4.63818	1445	7
1439	4.64008	1446	7
1440	4.64197	1447	7
1441	4.64386	1448	7
1442	4.64575	1449	7
1443	4.64764	1450	7
1444	4.64953	1451	7
1445	4.65141	1452	7
1446	4.6533	1453	7
1447	4.65518	1454	7
1448	4.65707	1455	7
1449	4.65895	1456	7
1450	4.66083	1457	7
1451	4.66271	1458	7
1452	4.66458	1459	7
1453	4.66646	1460	7
1454	4.66833	1461	7
1455	4.67021	1462	7
1456	4.67208	1463	7
1457	4.67395	1464	7
1458	4.67582	1465	7
1459	4.67769	1466	7
1460	4.67955	1467	7
1461	4.68142	1468	7
1462	4.68328	1469	7
1463	4.68514	1470	7
1464	4.68701	1471	7
1465	4.68887	1472	7
1466	4.69072	1473	7
1467	4.69258	1474	7
1468	4.69444	1475	7
1469	4.69629	1476	7
1470	4.69815	1477	7
1471	4.7	1478	7
1472	4.70185	1479	7
1473	4.7037	1480	7
1474	4.70555	1481	7
1475	4.7074	1482	7
1476	4.70924	1483	7
1477	4.71109	1484	7
1478	4.71293	1485	7
1479	4.71477	1486	7
1480	4.71662	1487	7
1481	4.71846	1488	7
1482	4.72029	1489	7
1483	4.72213	1490	7
1484	4.72397	1491	7
1485	4.7258	1492	7
1486	4.72764	1493	7
1487	4.72947	1494	7
1488	4.7313	1495	7
1489	4.73313	1496	7
1490	4.73496	1497	7
1491	4.73679	1498	7
1492	4.73861	1499	7
1493	4.74044	1500	7
1494	4.74226	1501	7
1495	4.74408	1502	7
1496	4.74591	1503	7
1497	4.74773	1504	7
1498	4.74955	1505	7
1499	4.75136	1506	7
1500	4.75318	1507	7
1501	4.755	1508	7
1502	4.75681	1509	7
1503	4.75862	1510	7
1504	4.76043	1511	7
1505	4.76225	1512	7
1506	4.76405	1513	7
1507	4.76586	1514	7
1508	4.76767	1515	7
1509	4.76948	1516	7
1510	4.77128	1517	7
1511	4.77308	1518	7
1512	4.77489	1519	7
1513	4.77669	1520	7
1514	4.77849	1521	7
1515	4.78029	1522	7
1516	4.78209	1523	7
1517	4.78388	1524	7
1518	4.78568	1525	7
1519	4.78747	1526	7
1520	4.78927	1527	7
1521	4.79106	1528	7
1522	4.79285	1529	7
1523	4.79464	1530	7
1524	4.79643	1531	7
1525	4.79821	1532	7
1526	4.8	1533	7
1527	4.80179	1534	7
1528	4.80357	1535	7
1529	4.80535	1536	7
1530	4.80713	1537	7
1531	4.80891	1538	7
1532	4.81069	1539	7
1533	4.81247	1540	7
1534	4.81425	1541	7
1535	4.81603	1542	7
1536	4.8178	1543	7
1537	4.81957	1544	7
1538	4.82135	1545.11	7.11111
1539	4.82312	1546.22	7.22222
1540	4.82489	1547.33	7.33333
1541	4.82666	1548.44	7.44444
1542	4.82843	1549.56	7.55556
1543	4.83019	1550.67	7.66667
1544	4.83196	1551.78	7.77778
1545	4.83373	1552.89	7.88889
1546	4.83549	1554	8
1547	4.83725	1554	7
1548	4.83901	1555	7
1549	4.84077	1556	7
1550	4.84253	1557	7
1551	4.84429	1558	7
1552	4.84605	1559	7
1553	4.84781	1560	7
1554	4.84956	1561	7
1555	4.85132	1562	7
1556	4.85307	1563	7
1557	4.85482	1564	7
1558	4.85657	1565	7
1559	4.85832	1566	7
1560	4.86007	1567	7
1561	4.86182	1568	7
1562	4.86356	1569	7
1563	4.86531	1570	7
1564	4.86705	1571	7
1565	4.8688	1572	7
1566	4.87054	1573	7
1567	4.87228	1574	7
1568	4.87402	1575	7
1569	4.87576	1576	7
1570	4.8775	1577	7
1571	4.87924	1578	7
1572	4.88097	1579	7
1573	4.88271	1580	7
1574	4.88444	1581	7
1575	4.88617	1582	7
1576	4.88791	1583	7
1577	4.88964	1584	7
1578	4.89137	1585.11	7.11111
1579	4.8931	1586.22	7.22222
1580	4.89482	1587.33	7.33333
1581	4.89655	1588.44	7.44444
1582	4.89828	1589.56	7.55556
1583	4.9	1590.67	7.66667
1584	4.90172	1591.78	7.77778
1585	4.90345	1592.89	7.88889
1586	4.90517	1594	8
1587	4.90689	1594	7
1588	4.90861	1595.11	7.11111
1589	4.91033	1596.22	7.22222
1590	4.91204	1597.33	7.33333
1591	4.91376	1598.44	7.44444
1592	4.91548	1599.56	7.55556
1593	4.91719	1600.67	7.66667
1594	4.9189	1601.78	7.77778
1595	4.92062	1602.89	7.88889
1596	4.92233	1604	8
1597	4.92404	1605	8
1598	4.92575	1606	8
1599	4.92746	1607	8
1600	4.92916	1608	8
1601	4.93087	1609	8
1602	4.93258	1610	8
1603	4.93428	1611	8
1604	4.93598	1612	8
1605	4.93769	1613	8
1606	4.93939	1614	8
1607	4.94109	1615	8
1608	4.94279	1616	8
1609	4.94449	1617	8
1610	4.94618	1618	8
1611	4.94788	1619	8
1612	4.94958	1620	8
1613	4.95127	1621	8
1614	4.95296	1622	8
1615	4.95466	1623	8
1616	4.95635	1624	8
1617	4.95804	1625.11	8.11111
1618	4.95973	1626.22	8.22222
1619	4.96142	1627.33	8.33333
1620	4.96311	1628.44	8.44444
1621	4.96479	1629.56	8.55556
1622	4.96648	1630.67	8.66667
1623	4.96816	1631.78	8.77778
1624	4.96985	1632.89	8.88889
1625	4.97153	1634	9
1626	4.97321	1635	9
1627	4.97489	1636	9
1628	4.97658	1637	9
1629	4.97825	1638	9
1630	4.97993	1639	9
1631	4.98161	1640	9
1632	4.98329	1641	9
1633	4.98496	1642	9
1634	4.98664	1643	9
1635	4.98831	1644	9
1636	4.98998	1645	9
1637	4.99166	1646	9
1638	4.99333	1647	9
1639	4.995	1648	9
1640	4.99666	1649	9
1641	4.99833	1650	9
1642	5	1651	9
1643	5.00167	1652	9
1644	5.00333	1653	9
1645	5.005	1654	9
1646	5.00666	1655	9
1647	5.00832	1656	9
1648	5.00998	1657	9
1649	5.01164	1658	9
1650	5.0133	1659	9
1651	5.01496	1660	9
1652	5.01662	1661	9
1653	5.01828	1662	9
1654	5.01993	1663	9
1655	5.02159	1664	9
1656	5.02324	1665	9
1657	5.0249	1666	9
1658	5.02655	1667	9
1659	5.0282	1668	9
1660	5.02985	1669	9
1661	5.0315	1670	9
1662	5.03315	1671	9
1663	5.0348	1672	9
1664	5.03645	1673	9
1665	5.03809	1674	9
1666	5.03974	1675	9
1667	5.04138	1676	9
1668	5.04302	1677	9
1669	5.04467	1678	9
1670	5.04631	1679	9
1671	5.04795	1680	9
1672	5.04959	1681	9
1673	5.05123	1682	9
1674	5.05287	1683	9
1675	5.0545	1684	9
1676	5.05614	1685	9
1677	5.05778	1686	9
1678	5.05941	1687	9
1679	5.06105	1688	9
1680	5.06268	1689	9
1681	5.06431	1690	9
1682	5.06594	1691	9
1683	5.06757	1692	9
1684	5.0692	1693	9
1685	5.07083	1694	9
1686	5.07246	1695	9
1687	5.07409	1696	9
1688	5.07571	1697	9
1689	5.07734	1698	9
1690	5.07896	1699	9
1691	5.08058	1700	9
1692	5.08221	1701	9
1693	5.08383	1702	9
1694	5.08545	1703	9
1695	5.08707	1704	9
1696	5.08869	1705.05	9.05263
1697	5.09031	1706.11	9.10526
1698	5.09192	1707.16	9.15789
1699	5.09354	1708.21	9.21053
1700	5.09516	1709.26	9.26316
1701	5.09677	1710.32	9.31579
1702	5.09839	1711.37	9.36842
1703	5.1	1712.42	9.42105
1704	5.10161	1713.47	9.47368
1705	5.10322	1714.53	9.52632
1706	5.10483	1715.58	9.57895
1707	5.10644	1716.63	9.63158
1708	5.10805	1717.68	9.68421
1709	5.10966	1718.74	9.73684
1710	5.11127	1719.79	9.78947
1711	5.11288	1720.84	9.84211
1712	5.11448	1721.89	9.89474
1713	5.11609	1722.95	9.94737
1714	5.11769	1724	10
1715	5.11929	1724	9
1716	5.1209	1725	9
1717	5.1225	1726	9
1718	5.1241	1727	9
1719	5.1257	1728	9
1720	5.1273	1729	9
1721	5.1289	1730	9
1722	5.1305	1731	9
1723	5.13209	1732	9
1724	5.13369	1733	9
1725	5.13528	1734	9
1726	5.13688	1735	9
1727	5.13847	1736	9
1728	5.14006	1737	9
1729	5.14166	1738	9
1730	5.14325	1739	9
1731	5.14484	1740	9
1732	5.14643	1741	9
1733	5.14802	1742	9
1734	5.1496	1743	9
1735	5.15119	1744	9
1736	5.15278	1745	9
1737	5.15436	1746	9
1738	5.15595	1747	9
1739	5.15753	1748	9
1740	5.15911	1749	9
1741	5.1607	1750	9
1742	5.16228	1751	9
1743	5.16386	1752	9
1744	5.16544	1753	9
1745	5.16702	1754	9
1746	5.1686	1755.11	9.11111
1747	5.17017	1756.22	9.22222
1748	5.17175	1757.33	9.33333
1749	5.17333	1758.44	9.44444
1750	5.1749	1759.56	9.55556
1751	5.17648	1760.67	9.66667
1752	5.17805	1761.78	9.77778
1753	5.17962	1762.89	9.88889
1754	5.18119	1764	10
1755	5.18277	1764	9
1756	5.18434	1765.11	9.11111
1757	5.18591	1766.22	9.22222
1758	5.18748	1767.33	9.33333
1759	5.18904	1768.44	9.44444
1760	5.19061	1769.56	9.55556
1761	5.19218	1770.67	9.66667
1762	5.19374	1771.78	9.77778
1763	5.19531	1772.89	9.88889
1764	5.19687	1774	10
1765	5.19844	1775	10
1766	5.2	1776	10
1767	5.20156	1777	10
1768	5.20312	1778	10
1769	5.20468	1779	10
1770	5.20624	1780	10
1771	5.2078	1781	10
1772	5.20936	1782	10
1773	5.21092	1783	10
1774	5.21248	1784	10
1775	5.21403	1785	10
1776	5.21559	1786	10
1777	5.21714	1787	10
1778	5.2187	1788	10
1779	5.22025	1789	10
1780	5.2218	1790	10
1781	5.22335	1791	10
1782	5.2249	1792	10
1783	5.22645	1793	10
1784	5.228	1794	10
1785	5.22955	1795	10
1786	5.2311	1796	10
1787	5.23265	1797	10
1788	5.23419	1798	10
1789	5.23574	1799	10
1790	5.23728	1800	10
1791	5.23883	1801	10
1792	5.24037	1802	10
1793	5.24191	1803	10
1794	5.24345	1804	10
1795	5.245	1805	10
1796	5.24654	1806	10
1797	5.24808	1807	10
1798	5.24962	1808	10
1799	5.25115	1809	10
1800	5.25269	1810	10
1801	5.25423	1811	10
1802	5.25576	1812	10
1803	5.2573	1813	10
1804	5.25883	1814	10
1805	5.26037	1814.83	9.83333
1806	5.2619	1815.67	9.66667
1807	5.26343	1816.5	9.5
1808	5.26497	1817.33	9.33333
1809	5.2665	1818.17	9.16667
1810	5.26803	1819	9
1811	5.26956	1819.83	8.83333
1812	5.27109	1820.67	8.66667
1813	5.27261	1821.5	8.5
1814	5.27414	1822.33	8.33333
1815	5.27567	1823.17	8.16667
1816	5.27719	1824	8
1817	5.27872	1825.25	8.25
1818	5.28024	1826.5	8.5
1819	5.28177	1827.75	8.75
1820	5.28329	1829	9
1821	5.28481	1830.25	9.25
1822	5.28634	1831.5	9.5
1823	5.28786	1832.75	9.75
1824	5.28938	1834	10
1825	5.2909	1834	9
1826	5.29242	1835	9
1827	5.29393	1836	9
1828	5.29545	1837	9
1829	5.29697	1838	9
1830	5.29848	1839	9
1831	5.3	1840	9
1832	5.30151	1841	9
1833	5.30303	1842	9
1834	5.30454	1843	9
1835	5.30606	1844	9
1836	5.30757	1845.11	9.11111
1837	5.30908	1846.22	9.22222
1838	5.31059	1847.33	9.33333
1839	5.3121	1848.44	9.44444
1840	5.31361	1849.56	9.55556
1841	5.31512	1850.67	9.66667
1842	5.31662	1851.78	9.77778
1843	5.31813	1852.89	9.88889
1844	5.31964	1854	10
1845	5.32114	1855	10
1846	5.32265	1856	10
1847	5.32415	1857	10
1848	5.32566	1858	10
1849	5.32716	1859	10
1850	5.32866	1860	10
1851	5.33017	1861	10
1852	5.33167	1862	10
1853	5.33317	1863	10
1854	5.33467	1864	10
1855	5.33617	1865	10
1856	5.33766	1866	10
1857	5.33916	1867	10
1858	5.34066	1868	10
1859	5.34215	1869	10
1860	5.34365	1870	10
1861	5.34515	1871	10
1862	5.34664	1872	10
1863	5.34813	1873	10
1864	5.34963	1874	10
1865	5.35112	1875	10
1866	5.35261	1876	10
1867	5.3541	1877	10
1868	5.35559	1878	10
1869	5.35708	1879	10
1870	5.35857	1880	10
1871	5.36006	1881	10
1872	5.36155	1882	10
1873	5.36303	1883	10
1874	5.36452	1884	10
1875	5.36601	1885	10
1876	5.36749	1886	10
1877	5.36898	1887	10
1878	5.37046	1888	10
1879	5.37194	1889	10
1880	5.37343	1890	10
1881	5.37491	1891	10
1882	5.37639	1892	10
1883	5.37787	1893	10
1884	5.37935	1894	10
1885	5.38083	1895	10
1886	5.38231	1896	10
1887	5.38378	1897	10
1888	5.38526	1898	10
1889	5.38674	1899	10
1890	5.38821	1900	10
1891	5.38969	1901	10
1892	5.39116	1902	10
1893	5.39264	1903	10
1894	5.39411	1904	10
1895	5.39559	1905	10
1896	5.39706	1906	10
1897	5.39853	1907	10
1898	5.4	1908	10
1899	5.40147	1909	10
1900	5.40294	1910	10
1901	5.40441	1911	10
1902	5.40588	1912	10
1903	5.40735	1913	10
1904	5.40881	1914	10
1905	5.41028	1915	10
1906	5.41174	1916	10
1907	5.41321	1917	10
1908	5.41467	1918	10
1909	5.41614	1919	10
1910	5.4176	1920	10
1911	5.41906	1921	10
1912	5.42053	1922	10
1913	5.42199	1923	10
1914	5.42345	1924	10
1915	5.42491	1925	10
1916	5.42637	1926	10
1917	5.42783	1927	10
1918	5.42929	1928	10
1919	5.43074	1929	10
1920	5.4322	1930	10
1921	5.43366	1931	10
1922	5.43511	1932	10
1923	5.43657	1933	10
1924	5.43802	1934	10
1925	5.43948	1935	10
1926	5.44093	1936	10
1927	5.44238	1937	10
1928	5.44384	1938	10
1929	5.44529	1939	10
1930	5.44674	1940	10
1931	5.44819	1941	10
1932	5.44964	1942	10
1933	5.45109	1943	10
1934	5.45254	1944	10
1935	5.45398	1945	10
1936	5.45543	1946	10
1937	5.45688	1947	10
1938	5.45832	1948	10
1939	5.45977	1949	10
1940	5.46121	1950	10
1941	5.46266	1951	10
1942	5.4641	1952	10
1943	5.46554	1953	10
1944	5.46699	1954	10
1945	5.46843	1955	10
1946	5.46987	1956	10
1947	5.47131	1957	10
1948	5.47275	1958	10
1949	5.47419	1959	10
1950	5.47563	1960	10
1951	5.47707	1961	10
1952	5.47851	1962	10
1953	5.47994	1963	10
1954	5.48138	1964	10
1955	5.48281	1965	10
1956	5.48425	1966	10
1957	5.48569	1967	10
1958	5.48712	1968	10
1959	5.48855	1969	10
1960	5.48999	1970	10
1961	5.49142	1971	10
1962	5.49285	1972	10
1963	5.49428	1973	10
1964	5.49571	1974	10
1965	5.49714	1975	10
1966	5.49857	1976	10
1967	5.5	1977	10
1968	5.50143	1978	10
1969	5.50286	1979	10
1970	5.50428	1980	10
1971	5.50571	1981	10
1972	5.50714	1982	10
1973	5.50856	1983	10
1974	5.50999	1984	10
1975	5.51141	1985	10
1976	5.51283	1986	10
1977	5.51426	1987	10
1978	5.51568	1988	10
1979	5.5171	1989	10
1980	5.51852	1990	10
1981	5.51994	1991	10
1982	5.52136	1992	10
1983	5.52278	1993	10
1984	5.5242	1994	10
1985	5.52562	1995	10
1986	5.52704	1996	10
1987	5.52846	1997	10
1988	5.52987	1998	10
1989	5.53129	1999	10
1990	5.5327	2000	10
1991	5.53412	2001	10
1992	5.53553	2002	10
1993	5.53695	2003	10
[truncated: 1,842 more rows]
